# Supplementary material for: Biotic colonization of subtropical East Asian caves through time
Source: PubMed Central journal article supplement — Proc Natl Acad Sci U S A. 2022 Aug 15;119(34):e2207199119. doi: 10.1073/pnas.2207199119 (PMC9407641; doi:10.1073/pnas.2207199119), 2022-08-15
Supplement: pnas.2207199119.sapp.pdf [file pnas.2207199119.sapp.pdf]

1

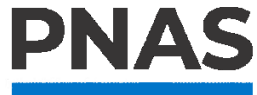

2

3

4 **Supplementary Information for**

5 **Biotic colonization of subtropical East Asian caves through time**

6

7 Xiao-Qian Li<sup>a,b</sup>, Xiao-Guo Xiang<sup>c</sup>, Florian Jabbour<sup>d</sup>, Oskar Hagen<sup>e</sup>, Rosa del C. Ortiz<sup>f</sup>, Pamela S.

8 Soltis<sup>g</sup>, Douglas E. Soltis<sup>g,h</sup>, and Wei Wang<sup>a,b,1</sup>

9

10 <sup>1</sup>To whom correspondence should be addressed. Email: [wangwei1127@ibcas.ac.cn](mailto:wangwei1127@ibcas.ac.cn)

11

12 **This PDF file includes:**

13 Supplementary Text

14 Figures S1 to S9

15 Tables S1 to S7

16 Legends for Movies S1

17 SI References

18

19 **Other supplementary materials for this manuscript include the following:**

20 Movies S1

## 21 **Supplementary Text**

### 22 **Materials and Methods**

#### 23 **Phylogenetic analysis and molecular dating**

24 We selected 28 plant, animal, and fungal clades that are well represented in subtropical East  
25 Asian caves and epigeal habitats and that have sufficient molecular data. The 28 clades include  
26 1437 sampled species, of which 189 are endemic cave-dwelling species. Among these, we  
27 assessed two clades of ferns (seven endemic cave-dwelling species; 185 species in the utilized  
28 phylogenies; representing 33-36% of the total number of species recognized), 10 clades of  
29 angiosperms (41 spp; 893 spp; 18-80%), four clades of arachnids (93 spp; 135 spp; 54-100%),  
30 two clades of reptiles (2 spp; 27 spp; 81-82%), one clade of amphibians (2 spp; 41 spp; 69%),  
31 four clades of fishes (24 spp; 88 spp; 33-71%), and five clades of fungi (20 spp; 68 spp; 60-  
32 100%). These selected taxa consist of organisms with a wide variety of phylogenetic  
33 backgrounds and ecologies. We think that our sampling is representative of the subtropical East  
34 Asia cave biota as a whole. We collected phylogenetic data using DNA sequences from  
35 GenBank and estimated divergence times. GenBank accession numbers are listed in *SI Appendix*,  
36 Table S7. Phylogenetic analyses and molecular dating details for each clade are listed below:

37

#### 38 ***Polystichum* (Dryopteridaceae, Polypodiales, Ferns)**

39 Four plastid DNA regions (*rbcL*: 1349 bp, *psbA-trnH*: 673 bp, *rps4-trnS*: 1190 bp, *trnL-F*: 1250  
40 bp) were used to construct a dated phylogeny for *Polystichum*. Following the results of Testo and  
41 Sundue (1), we used two secondary calibration points: 39.34 Ma (95% HPD: 37.78–41.38) for  
42 the stem group age of *Polystichum* and 104.82 Ma (95% HPD: 89.97–111.29) for the root age.  
43 Our divergence time estimate suggests a crown group age of 39.82 Ma (95% HPD: 36.56–43.23)  
44 for *Polystichum*, which coincides with a previous time estimate (39.25 Ma; 95% HPD: 35.61–  
45 42.66) (2).

46

47 ***Hymenasplenium* (Aspleniaceae, Polypodiales, Ferns)**

48 We re-analyzed the dataset of Xu et al. (3) to construct a dated phylogeny for *Hymenasplenium*  
49 based on four plastid DNA regions (*atpB*: 1278 bp, *rbcL*: 1383 bp, *rps4-trnS*: 1147 bp, *trnL-F*:  
50 1084 bp). Given that there are no reliable *Hymenasplenium* fossils, we used a secondary  
51 calibration point, using a single age estimated in a broad study of ferns (4): 57.7 Ma for the stem  
52 age of *Hymenasplenium*. The 95% HPD of this age was set based on Rothfels et al. (5).

53

54 **Lysimachieae (Primulaceae, Ericales, Angiosperms)**

55 One nuclear (ITS: 715 bp) and ten plastid (*matK*: 810 bp, *rbcL*: 877 bp, *rps16*: 1037 bp, *atpB*-  
56 *rbcL*: 1212 bp, *atpF-atpH*: 652 bp, *rpl20-rps12*: 915 bp, *rpl32-trnL*: 1307 bp, *trnH-psbA*: 1906  
57 bp, *trnL-F*: 1152 bp, *trnS-trnG*: 1138 bp) DNA regions were used to construct a dated phylogeny  
58 for Lysimachieae. *Lysimachia* sp., fossil seeds from the latest part of the Middle Miocene (12–16  
59 Ma) of Jutland, Denmark (6), are close to extant *L. vulgaris*, *L. terrestris*, and *L. thyrsoiflora*  
60 based on seed-coat surface and outer layer and columnar cells in the outer seed-coat layer (7).  
61 We followed Yan et al. (8) and gave a lower bound of 12 Ma for the crown group age of the *L.*  
62 *vulgaris-L. terrestris* clade. We also used two secondary calibration points, using ages estimated  
63 in a broad study of the family Primulaceae (9), 28.47 Ma (95% HPD: 23.03–37.67) for the split  
64 between the core *Lysimachia* and *Anagallis* and 37.9 Ma (95% HPD: 26.4–49.4) for the stem  
65 group age of Lysimachieae. Our divergence time estimate suggests a crown group age of 31.47  
66 Ma (95% HPD: 24.98–37.36) for Lysimachieae, which coincides with the time estimate of Yan  
67 et al. (8) (31.45 Ma; 95% HPD: 24.85–38.32).

68

69 ***Mitreola* (Loganiaceae, Gentianales, Angiosperms)**

70 Four plastid (*matK*: 775 bp, *rbcL*: 591 bp, *petB-petD*: 1029 bp, *psbA-trnH*: 663 bp) and two  
71 nuclear (ITS: 763 bp and ETS: 432 bp) DNA regions were used to construct a dated phylogeny  
72 for *Mitreola*. We used two secondary calibration points, using ages estimated in a broad study of  
73 the family Loganiaceae (10): 17.35 Ma (95% HPD: 9.3–26.87) for the stem age of *Mitreola* and  
74 23.12 Ma (95% HPD: 12.99–34.89) for the root age.

75

#### 76 ***Primulina* (Gesneriaceae, Lamiales, Angiosperms)**

77 Nine plastid (*ndhA*-intron: 922 bp, *ycf1*-1: 543 bp, *ycf1*-2: 801 bp, *atpB-rbcL*: 1239 bp, *ndhH*-  
78 *rps15-ycf1*: 991 bp, *rpl32-trnL*: 1205 bp, *rpoB-trnC*: 977 bp, *trnC-petN*: 841 bp, *trnL-F*: 1030 bp)  
79 and nine nuclear (ITS: 1001 bp, 7FR: 1038 bp, 13FR: 894 bp, 97FR: 760 bp, 117FR: 694 bp,  
80 155FR: 960 bp, 166 FR: 1733 bp, 248FR: 1004 bp, and 383FR: 682 bp) DNA regions were used  
81 to construct a dated phylogeny for *Primulina*. We used two secondary calibration points, using  
82 ages estimated in a broad study of the family Gesneriaceae (11): 12.57 Ma (95% HPD: 10.33–  
83 15.56) for the crown age of *Primulina* and 15.89 Ma (95% HPD: 12.77–19.17) for the stem  
84 group age of *Primulina*.

85

#### 86 ***Petrocodon* (Gesneriaceae, Lamiales, Angiosperms)**

87 Plastid (*trnL-F*: 955 bp) and nuclear (ITS: 912 bp) DNA regions were used to construct a dated  
88 phylogeny for *Petrocodon*. We used two secondary calibration points, using ages estimated in a  
89 broad study of the family Gesneriaceae (11): 11.7 Ma (95% HPD: 8.9–14.76) for the crown age  
90 of *Petrocodon* and 15.89 Ma (95% HPD: 12.77–19.17) for the stem group age of *Petrocodon*.

91

#### 92 ***Petrocosmea* (Gesneriaceae, Lamiales, Angiosperms)**

93 One nuclear (ITS: 885 bp) and four plastid (*matK*: 1661 bp, *rps16*: 845 bp, *trnL-F*: 919 bp, *trnT*-  
94 *L*: 739 bp) DNA regions were used to construct a dated phylogeny for *Petrocosmea*. We used

95 two secondary calibration points, using ages estimated in a broad study of the family  
96 Gesneriaceae (11): 10.72 Ma (95% HPD: 8.31–13.22) for the stem group age of *Petrocosmea*  
97 and 17.02 Ma (95% HPD: 14.12–20.74) for the root age.

98

99 ***Hemiboea* (Gesneriaceae, Lamiales, Angiosperms)**

100 We re-analyzed the dataset of Li et al. (12) to construct a dated phylogeny for *Hemiboea* based  
101 on one nuclear (ITS: 888 bp) and four plastid (*matK*: 1220 bp, *rbcL*: 723 bp, *rpS16* intron: 954  
102 bp, *atpB-rbcL*: 927 bp) DNA regions. We used two secondary calibration points, using ages  
103 estimated in a broad study of the family Gesneriaceae (11): 15.31 Ma (95% HPD: 12.15–18.87)  
104 for the stem group age of *Hemiboea* and 25.98 Ma (95% HPD: 22.15–31) for the root age.

105

106 ***Lysionotus* (Gesneriaceae, Lamiales, Angiosperms)**

107 One nuclear (ITS: 1232 bp) and nine plastid (*matK*: 1455 bp, *ndhF*: 2105 bp, *rbcL*: 1440 bp,  
108 *rpS16*: 1070 bp, *atpB-rbcL*: 1575 bp, *rpL20-rpS12*: 962 bp, *trnE-trnT*: 945 bp, *trnL-trnF*: 1356  
109 bp, *trnT-trnL*: 795 bp) DNA regions were used to construct a dated phylogeny for *Lysionotus*.

110 We used two secondary calibration points, using ages estimated in a broad study of the family  
111 Gesneriaceae (11): 14.97 Ma (95% HPD: 11.78–18.45) for the stem group age of *Lysionotus* and  
112 25.98 Ma (95% HPD: 22.15–31) for the root age.

113

114 ***Paraboea* (Gesneriaceae, Lamiales, Angiosperms)**

115 Plastid (*trnL-F*: 945 bp) and nuclear (ITS: 1058 bp) DNA regions were used to construct a dated  
116 phylogeny for *Paraboea*. We used two secondary calibration points, using ages estimated in a  
117 broad study of the family Gesneriaceae (11): 25.6 Ma (95% HPD: 21.43–30.39) for the stem  
118 group age of *Paraboea* and 29 Ma (95% HPD: 24.88–34.65) for the root age.

119

120 ***Elatostema* (Urticaceae, Rosales, Angiosperms)**

121 We re-analyzed the dataset of Tseng et al. (13) to generate a dated phylogeny for *Elatostema*.

122 The dataset contains one nuclear (ITS: 1115 bp) and two plastid (*psbM-trnD*: 669 bp, *trnH-psbA*:  
123 501 bp) DNA regions. We used two secondary calibration points, using ages estimated in a broad  
124 study of Urticaceae (14): 29.6 Ma (95% HPD: 21.1–38.4) for the crown age of core *Elatostema*  
125 and 53.3 Ma (95% HPD: 41.5–66.0) for the root age.

126

127 **Asian *Begonia* clade (Begoniaceae, Cucurbitales, Angiosperms)**

128 One nuclear (ITS: 1035 bp) and six plastid (*ndhA*: 1557bp, *ndhF-rpl32*: 2038 bp, *psbM-trnD*:  
129 1036bp, *psbM-ycf6*: 1230 bp, *trnC-ycf6*: 1136 bp, *trnL-rpl32*: 1754 bp) DNA regions were used  
130 to construct a dated phylogeny for the Asian *Begonia* clade. We used two secondary calibration  
131 points, using ages estimated in a broad study of all families of Cucurbitales and Fagales (15):  
132 16.1 Ma (95% HPD: 9.1–22.5) for the split between Clade 11 and Clade 49 and 13.0 Ma (95%  
133 HPD: 7.7–18.9) for the split between Clade 50 and Clade 51. Our divergence time estimate  
134 suggests a crown group age of 15.55 Ma (95% HPD: 10.85–20.49) for the Asian *Begonia* clade,  
135 which coincides with a previous time estimate (14.1 Ma; 95% HPD: 9.45–18.71) proposed by  
136 Chung et al. (16).

137

138 **Telemidae (Telemidae, Araneae, Arachnids)**

139 Two nuclear DNA regions (H3: 351 bp, Wnt: 376 bp) were used to construct a dated phylogeny  
140 for Telemidae. Following Shao and Li (17), we selected two fossil calibration points: (i)  
141 *Eoplectreurys gertschi* from the Jurassic of China (18) was used to give a lower bound of 170  
142 Ma for the crown group age of the Synspermiata clade; and (ii) *Microsegestria poinari* from the  
143 Lower Cretaceous found in Lebanese amber (135–125 Ma) (19) was used to give a lower bound  
144 of 125 Ma for the crown age of Dysderoidea. We also used a secondary calibration point, using

145 an age estimated in the study of Shao and Li (17): 237 Ma (95% HPD: 195–283) for the split  
146 between the core Synspermiata and Filistatidae.

147

#### 148 ***Nesticella* (Nesticidae, Araneae, Arachnids)**

149 We re-analyzed the dataset of Ballarin and Li (20) to construct a dated phylogeny for *Nesticella*.

150 The dataset contains two mitochondrial (16S rRNA: 595 bp, *COI*: 796 bp) and four nuclear (18S

151 rRNA: 1832 bp, 28S rRNA: 2132 bp, Actin5c: 823 bp, H3: 340 bp) DNA regions. We used two

152 fossil calibration points. Fossils of Nesticidae are frequently found in Baltic amber (37–40 Ma);

153 for example, species belonging to the extinct genus *Eopopino* Petrunkevitch, 1942,

154 *Balticonesticus* Wunderlich, 1986, and *Heteronesticus* Wunderlich, 1986 (21). The fossils share

155 general morphological similarities in the palpal structures with several extant European and

156 Asian genera and differ from the Asian genus *Hamus* in the structures of their palps and general

157 shape (20). Thus, we gave a lower bound of 37 Ma for the stem of the core Nesticidae. Another

158 relatively common genus of spiders found in Baltic amber (37–40 Ma) is *Pimoa* (21). These

159 fossils have been used previously in time-calibration studies of Orbiculariae spiders (22) and

160 Nesticidae spiders (20). Thus, we gave a lower bound of 37 Ma for the stem age of *Pimoa*. We

161 used two paleogeographic events as calibration points: the age of the formation of the Yangtze

162 River and its gorge (1.8–1.6 Ma) (23) and the estimated opening age of the East China Sea and

163 Sea of Japan (23–15 Ma) (24,25), which were used to constrain the split of the two different

164 *Nesticella mogera* populations, north and south of the river, and the endemic Japanese species

165 *Speleoticus uenoi* and its congeners in China (*Speleoticus navicellatus* and *Speleoticus* sp.),

166 respectively. We also set 107 Ma (95% HPD: 52–165) for the age of the most recent common

167 ancestor of Nesticidae, Linyphiidae, and Pimoidae, following Garrison et al. (26). Our

168 divergence time estimate suggests a crown group age of 34.46 Ma (95% HPD: 26.06–48.7) for

169 *Nesticella*, which coincides with the estimate of Ballarin and Li (28.3 Ma; 95% HPD: 21.4–35.5)  
170 (20).

171

172 ***Troglocoelotes* (Agelenidae, Araneae, Arachnids)**

173 Four mitochondrial (12S rRNA: 317 bp, 16S rRNA: 382 bp, *CoxI*: 1182 bp, *NadI*: 523 bp) and  
174 four nuclear (18S rRNA: 1640 bp, 28S rRNA: 1777 bp, H3: 297 bp, Wnt: 339 bp) DNA regions  
175 were used to construct a dated-phylogeny for *Troglocoelotes*. We used two secondary calibration  
176 points, taking ages estimated in the broad study of the order Araneida (27): 46.25 Ma (95% HPD:  
177 41.59–51.10) for the stem age of the *Troglocoelotes*, and 52.45 Ma (95% HPD: 46.84–57.9) for  
178 the root age.

179

180 ***Notiocoelotes* (Agelenidae, Araneae, Arachnids)**

181 Four mitochondrial (12S rRNA: 317 bp, 16S rRNA: 382 bp, *CoxI*: 1182 bp, *NadI*: 523 bp) and  
182 four nuclear (18S rRNA: 1640 bp, 28S rRNA: 1777 bp, H3: 297 bp, Wnt: 339 bp) DNA regions  
183 were used to construct a dated-phylogeny for *Notiocoelotes*. We used a secondary calibration  
184 point, taking ages estimated in the broad study of the order Araneida (27): 52.45 Ma (95% HPD:  
185 46.84–57.9) for the stem group age of *Notiocoelotes*.

186

187 ***Protobothrops* (Viperidae, Squamata, Reptiles)**

188 Four mitochondrial (12S rRNA: 1148 bp, 16S rRNA: 526 bp, *Cytb*: 1106 bp, *ND4*: 751 bp) and  
189 two nuclear (ETS: 432 bp, ITS: 763 bp) DNA regions were used to construct a dated phylogeny  
190 for *Protobothrops*. We used two secondary calibration points, using ages estimated in a broad  
191 study of the family Viperidae (28): 24.86 Ma (95% HPD: 20.49–29.43) for the stem group age of  
192 *Protobothrops* and 27.87 Ma (95% HPD: 23.5–32.46) for the root age.

193



194 ***Elaphe* (Colubridae, Squamata, Reptiles)**

195 One nuclear (C-mos: 567 bp) and five mitochondrial (12S rRNA: 870 bp, 16S rRNA: 581 bp,  
196 *Cytb*: 1157 bp, *ND2*: 987 bp, *ND4*: 889 bp) DNA regions were used to construct a dated  
197 phylogeny for *Elaphe*. We used two secondary calibration points, using ages estimated in a broad  
198 study of the family Colubridae (28): 35.61 Ma (95% HPD: 29.52–41.58) for the stem age of  
199 *Elaphe* and 31.77 Ma (95% HPD: 24.19–38.51) for the split age of *Oreocryptophis* and  
200 *Archelaphe*.

201

202 ***Odorrana* (Ranidae, Anura, Amphibians)**

203 One nuclear (C-mos: 567 bp) and eight mitochondrial (12S rRNA: 2463 bp, 16S rRNA: 2033 bp,  
204 *COI*: 1554 bp, *Cytb*: 1149 bp, *ND2*: 1066 bp, *ND3*: 467 bp, *RAG1*: 1506 bp, *Tyr*: 606 bp) DNA  
205 regions were used to construct a dated phylogeny for *Odorrana*. We used two secondary  
206 calibration points, using ages estimated in a broad study of the family Ranidae (28): 38.2 Ma  
207 (95% HPD: 33.56–42.88) for the stem group age of *Odorrana* and 34.18 Ma (95% HPD: 29.61–  
208 38.94) for the split age of *Rana* and *Pseudorana*.

209

210 ***Bibarba* (Cobitidae, Cypriniformes, Fishes)**

211 One mitochondrial gene (*Cytb*: 1141 bp) was used to construct a dated phylogeny for *Bibarba*.  
212 We used two secondary calibration points, using ages estimated in a broad study of the subfamily  
213 Cobitinae (29): 30.07 Ma (95% HPD: 25.55–34.69) for the crown age of the northern clade and  
214 42.11 Ma (95% HPD: 36.35–47.86) for the crown age of subfamily Cobitinae.

215

216 ***Oreonectes* (Nemacheilidae, Cypriniformes, Fishes)**

217 Two mitochondrial genes (*COI*: 1095 bp, *Cytb*: 1151 bp) were used to construct a dated  
218 phylogeny for *Oreonectes*. Following Chen et al. (30), we selected two fossil calibration points:

219 (i) the oldest fossil of *Plesiomyxocyprinus arratae* close to *Myxocyprinus asiaticus* from the  
220 Middle Eocene (38–40 Ma) was used to give a lower bound of 38 Ma for the stem age of  
221 *Myxocyprinus*; and (ii) a fossil of *Cobitis* from the Middle Miocene (13.8–15.9 Ma) was used to  
222 give a lower bound of 13.8 Ma for the stem age of *Cobitis*. The crown age of the family  
223 Nemacheilinae was constrained to 36.05 Ma (95% HPD: 23.00–51.09) (30).

224

#### 225 ***Triplophysa* (Nemacheilidae, Cypriniformes, Fishes)**

226 Two mitochondrial genes (*COI*: 1137 bp, *Cytb*: 1140 bp) were used to construct a dated  
227 phylogeny for *Triplophysa*. Following Chen et al. (30), we selected two fossil calibration points:

228 (i) the oldest fossil of *Plesiomyxocyprinus arratae* close to *Myxocyprinus asiaticus* from the  
229 Middle Eocene (38–40 Ma) was used to give a lower bound of 38 Ma for the stem age of  
230 *Myxocyprinus*; and (ii) a fossil of *Cobitis* from the Middle Miocene (13.8–15.9 Ma) was used to  
231 give a lower bound of 13.8 Ma for the stem age of *Cobitis*. The root age was set to 36.05 Ma  
232 (95% HPD: 23.00–51.09) (30).

233

#### 234 ***Sinocyclocheilus* (Cyprinidae, Cypriniformes, Fishes)**

235 We re-analyzed the dataset of Wen et al. (31) to construct a dated phylogeny for  
236 *Sinocyclocheilus* based on mitochondrial genome sequence data (33388 bp). Based on Wen et al.  
237 (31), we used two secondary calibration points, 35.39 Ma (95% HPD: 30.52–40.36) for the stem  
238 group age of *Sinocyclocheilus* and 71.66 Ma (95% HPD: 61.76–81.76) for the root age.

239

#### 240 ***Wardomyopsis* (Microascaceae, Microascales, Fungi)**

241 Four nuclear DNA regions (ITS: 576 bp, LSU: 810 bp, TEF: 899 bp, TUB: 487 bp) were used to  
242 construct a dated phylogeny for *Wardomyopsis*. We used two secondary calibration points,  
243 using ages estimated in a broad study of the Ascomycota (32): 88.91 Ma for the stem group age

244 of *Wardomyopsis*, and 76.57 Ma for the root age. Following Rothfels et al. (5), we assigned the  
245 95% HPD for these two ages.

246

247 ***Microascus* (Microascaceae, Microascales, Fungi)**

248 Four nuclear DNA regions (ITS: 593 bp, LSU: 811 bp, TEF: 895 bp, TUB: 502 bp) were used to  
249 construct a dated phylogeny for *Microascus*. We used three secondary calibration points, using  
250 ages estimated in a broad study of Ascomycota (32): 67.14 Ma for the stem group age of  
251 *Microascus*, 76.57 Ma for the most recent common ancestor of *Microascus*, *Scopulariopsis*, and  
252 *Pseudoscopulariopsis*, and 88.91 Ma for the root age. Following Rothfels et al. (5), we assigned  
253 the 95% HPD for these three ages.

254

255 ***Gamszarea* (Cordycipitaceae, Hypocreales, Fungi)**

256 Six nuclear DNA regions (ITS: 649 bp, LSU: 891 bp, RPB2: 1016 bp, SSU: 1044 bp, TEF: 1035  
257 bp, TUB 338 bp) were used to construct a dated phylogeny for *Gamszarea*. We used two  
258 secondary calibration points, using ages estimated in a broad study of Ascomycota (32): 72.25  
259 Ma for the most recent common ancestor of *Lecanicillium*, *Beauveria*, and *Cordyceps*, and  
260 134.28 Ma for the root age. Following Rothfels et al. (5), we assigned the 95% HPD for these  
261 two ages.

262

263 ***Simplicillium* (Cordycipitaceae, Hypocreales, Fungi)**

264 Five nuclear DNA regions (ITS: 691 bp, LSU: 829 bp, RPB2: 978 bp, SSU: 1025 bp, TEF: 923  
265 bp) were used to construct a dated phylogeny for *Simplicillium*. We used two secondary  
266 calibration points, using ages estimated in a broad study of Ascomycota (32): 72.25 Ma for the  
267 most recent common ancestor of *Akanthomyces*, *Beauveria*, and *Cordyceps*, and 134.28 Ma for  
268 the root age. Following Rothfels et al. (5), we assigned the 95% HPD for these two ages.

269

270 ***Paracremonium* (Nectriaceae, Hypocreales, Fungi)**

271 Five nuclear DNA regions (ITS: 607 bp, LSU: 860 bp, RPB2: 865 bp, TEF: 578 bp, TUB: 344  
272 bp) were used to construct a dated phylogeny for *Paracremonium*. We used a secondary  
273 calibration point, using ages estimated in a broad study of Ascomycota (32): 82.23 Ma for the  
274 stem group age of *Paracremonium*. Following Rothfels et al. (5), we assigned the 95% HPD for  
275 this age.

276

277 **Habitat, geographic range, and vegetation type**

278 Habitat, geographic range, and vegetation type were mainly obtained from the following sources:

279 African Plant Database (<http://africanplantdatabase.ch>)

280 AmphibiaChina (<https://www.amphibiachina.org>)

281 CABRI (<http://www.cabri.org>)

282 Catalogue of Life China (<http://sp2000.org.cn>)

283 FishBase ([www.fishbase.org](http://www.fishbase.org))

284 Flora of China (<http://www.efloras.org>)

285 Flora of North America (<http://floranorthamerica.org>)

286 Global Biodiversity Information Facility (<http://www.gbif.org>)

287 Hardy Fern Library (<https://hardyfernlibrary.com>)

288 KewScience-Plants of the World Online (<http://plantsoftheworldonline.org>)

289 Tropicos.org. Missouri Botanical Garden (<http://www.tropicos.org>)

290 SEINet (<https://swbiodiversity.org>)

291 The Reptile Database (<https://reptile-database.reptarium.cz>)

292 World Spider Catalog (<https://wsc.nmbe.ch>)

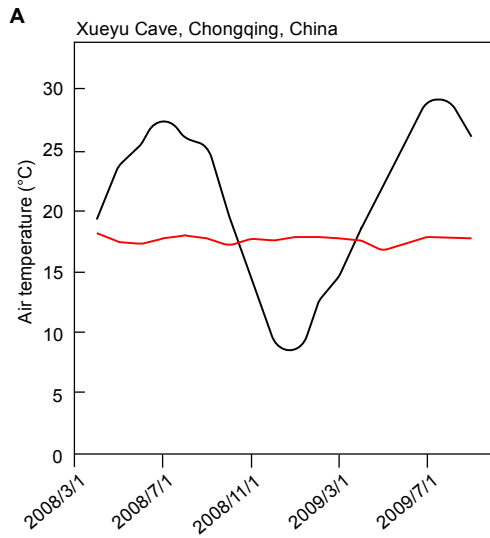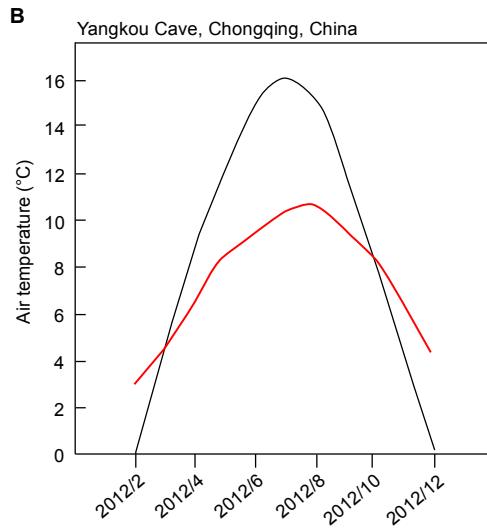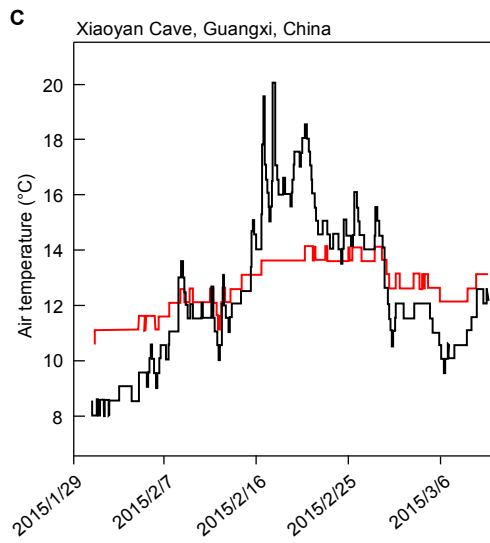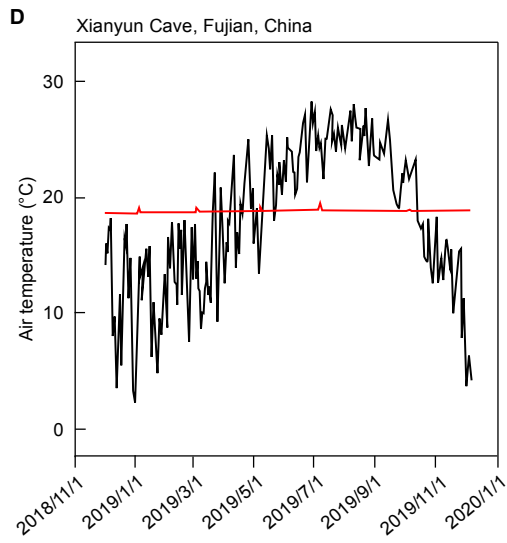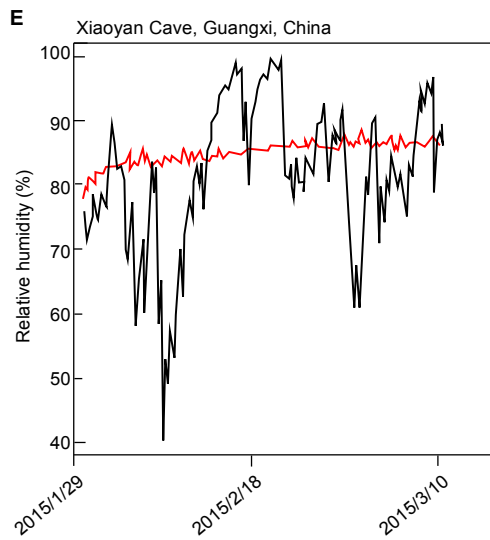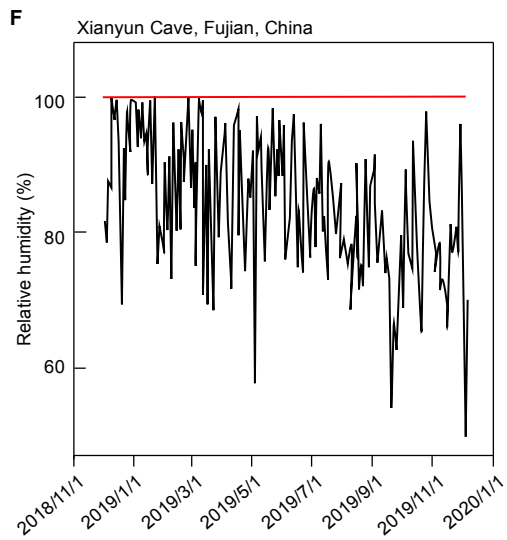

295 **Fig. S1. Temperature and/or relative humidity variation yearly inside (red) and outside**  
296 **(black) subtropical East Asian caves.** (A–D) Temperature variations. (A) Xueyu cave,  
297 Chongqing, China, modified from Pu et al. (33). (B) Yangkou cave, Chongqing, China, modified  
298 from Li et al. (34). (C) Xiaoyan cave, Guangxi, China, modified from Guo et al. (35). (D)  
299 Xianyun Cave, Fujian, China, modified from Yang et al. (36). (E–F) Relative humidity variation.  
300 (E) Xiaoyan cave, Guangxi, China, modified from Guo et al. (35). (F) Xianyun cave, Fujian,  
301 China, modified from Yang et al. (36).

A

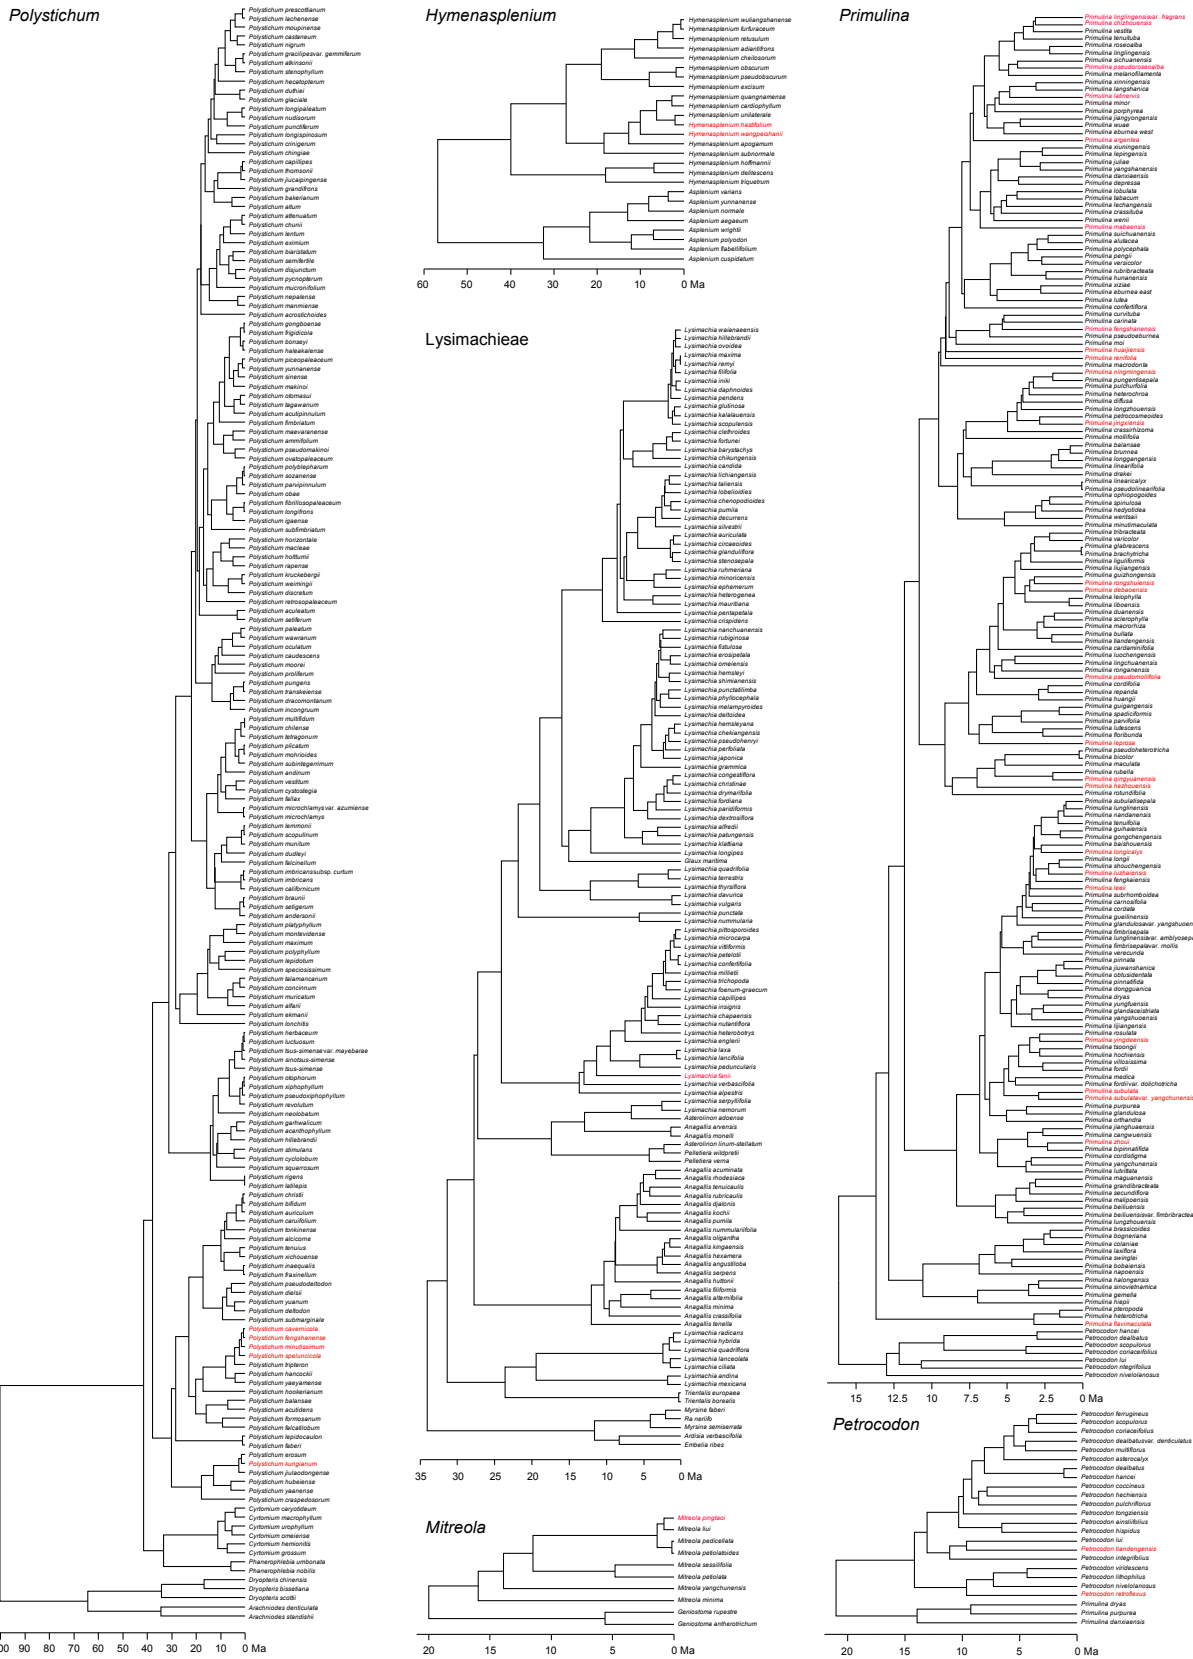







D

*Sinocytocheilus*

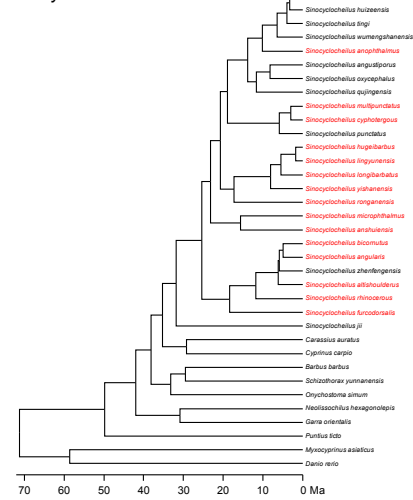

*Simplicillium*

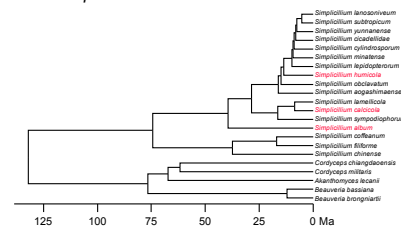

*Paracremonium*

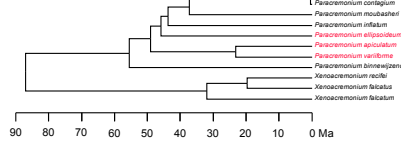

*Wardomycopis*

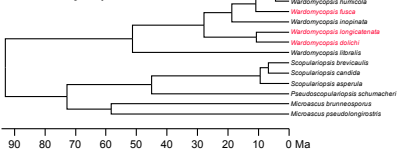

*Microascus*

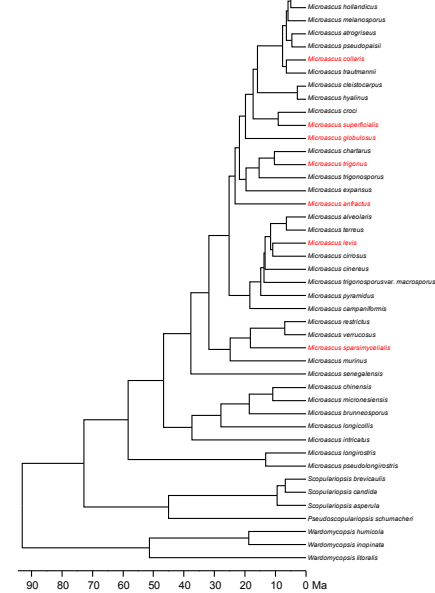

*Gamszarea*

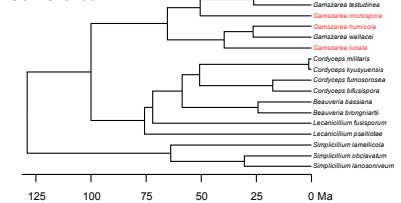

310 **Fig. S2. Timetrees for the 28 clades investigated.** (A) Chronograms for *Polystichum*,  
311 *Hymenasplenium*, Lysimachieae, *Mitreola*, *Primulina*, and *Petrocodon*. (B) Chronograms for  
312 *Petrocosmea*, *Hemiboea*, *Lysionotus*, *Paraboea*, *Elatostema*, and the Asian *Begonia* clade. (C)  
313 Chronograms for Telemidae, *Nesticella*, *Troglocoelotes*, *Notiocoelotes*, *Protobothrops*, *Elaphe*,  
314 *Odorrana*, *Bibarba*, *Oreonectes*, and *Triplophysa*. (D) Chronograms for *Sinocyclocheilus*,  
315 *Wardomyopsis*, *Microascus*, *Gamszarea*, *Simplicillium*, and *Paracremonium*. Endemic cave-  
316 dwelling species are printed in red, and other sampled species are in black. See *SI Appendix*,  
317 Table S4 for more details.

A

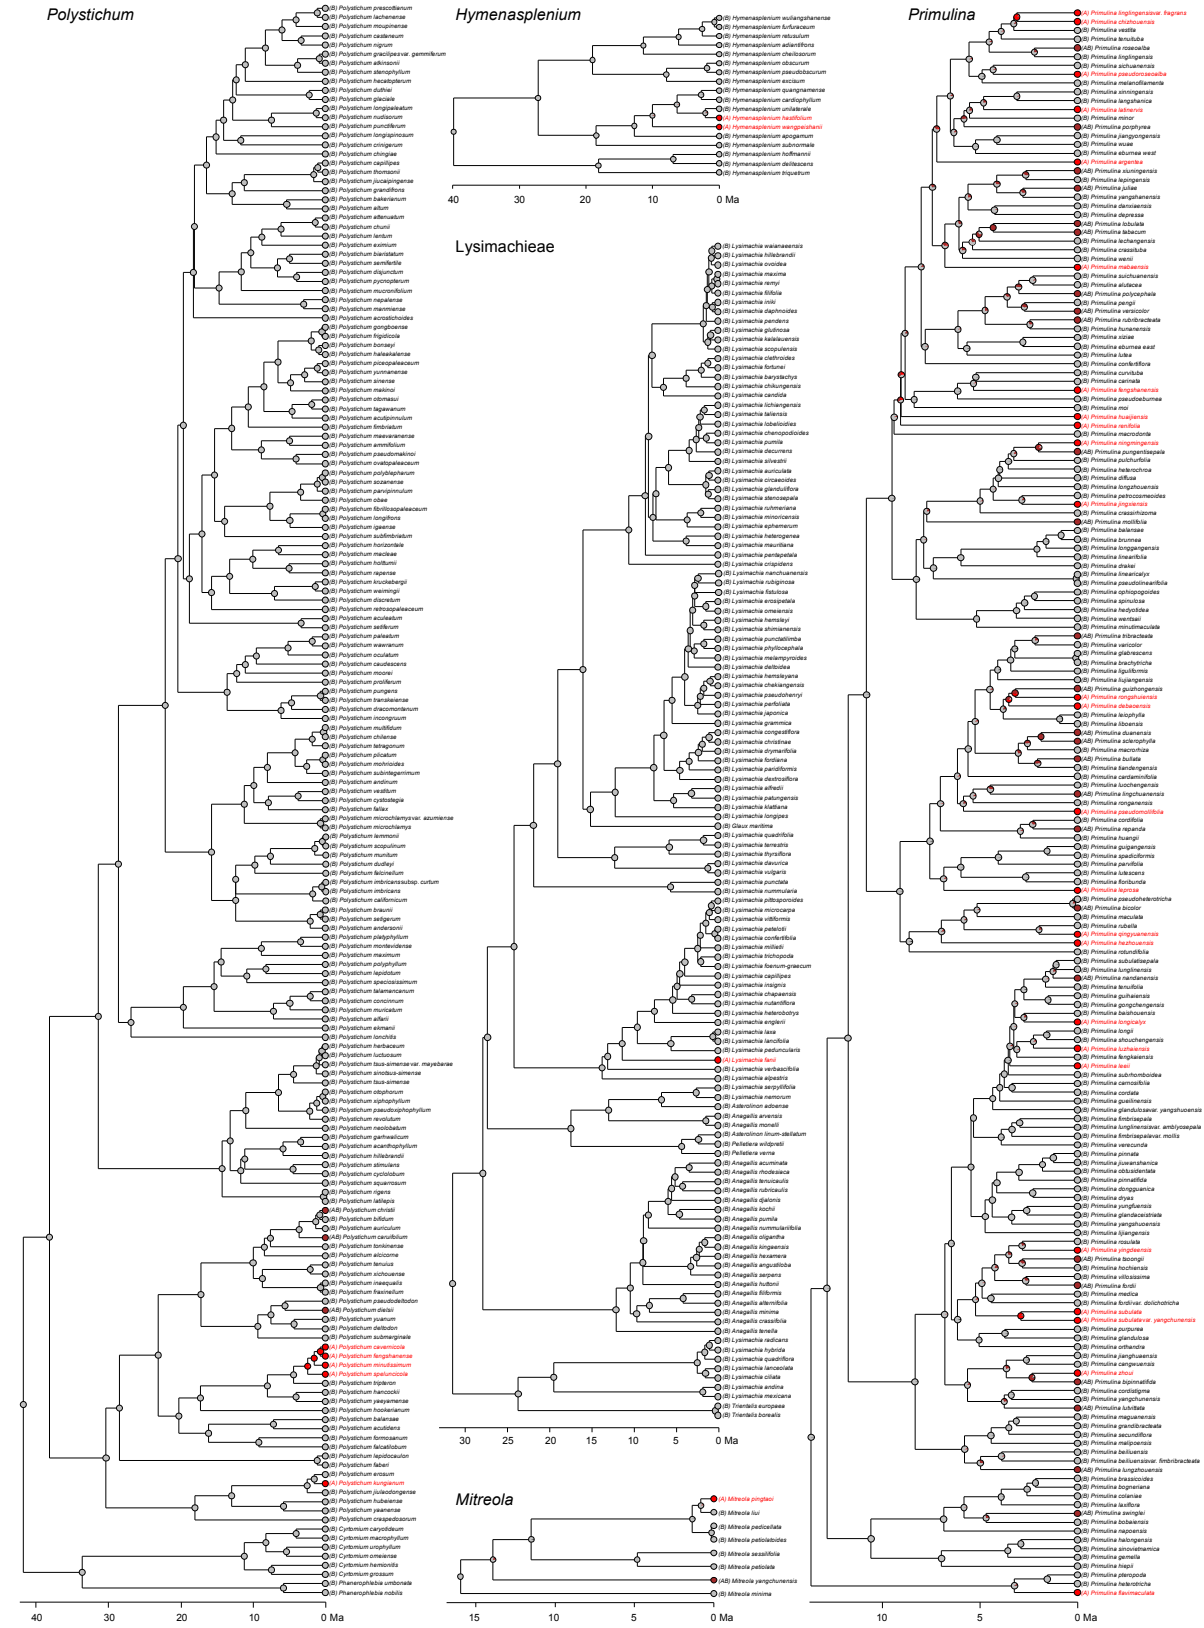

319 ● A: Hypogean ● B: Epigean ● AB



c

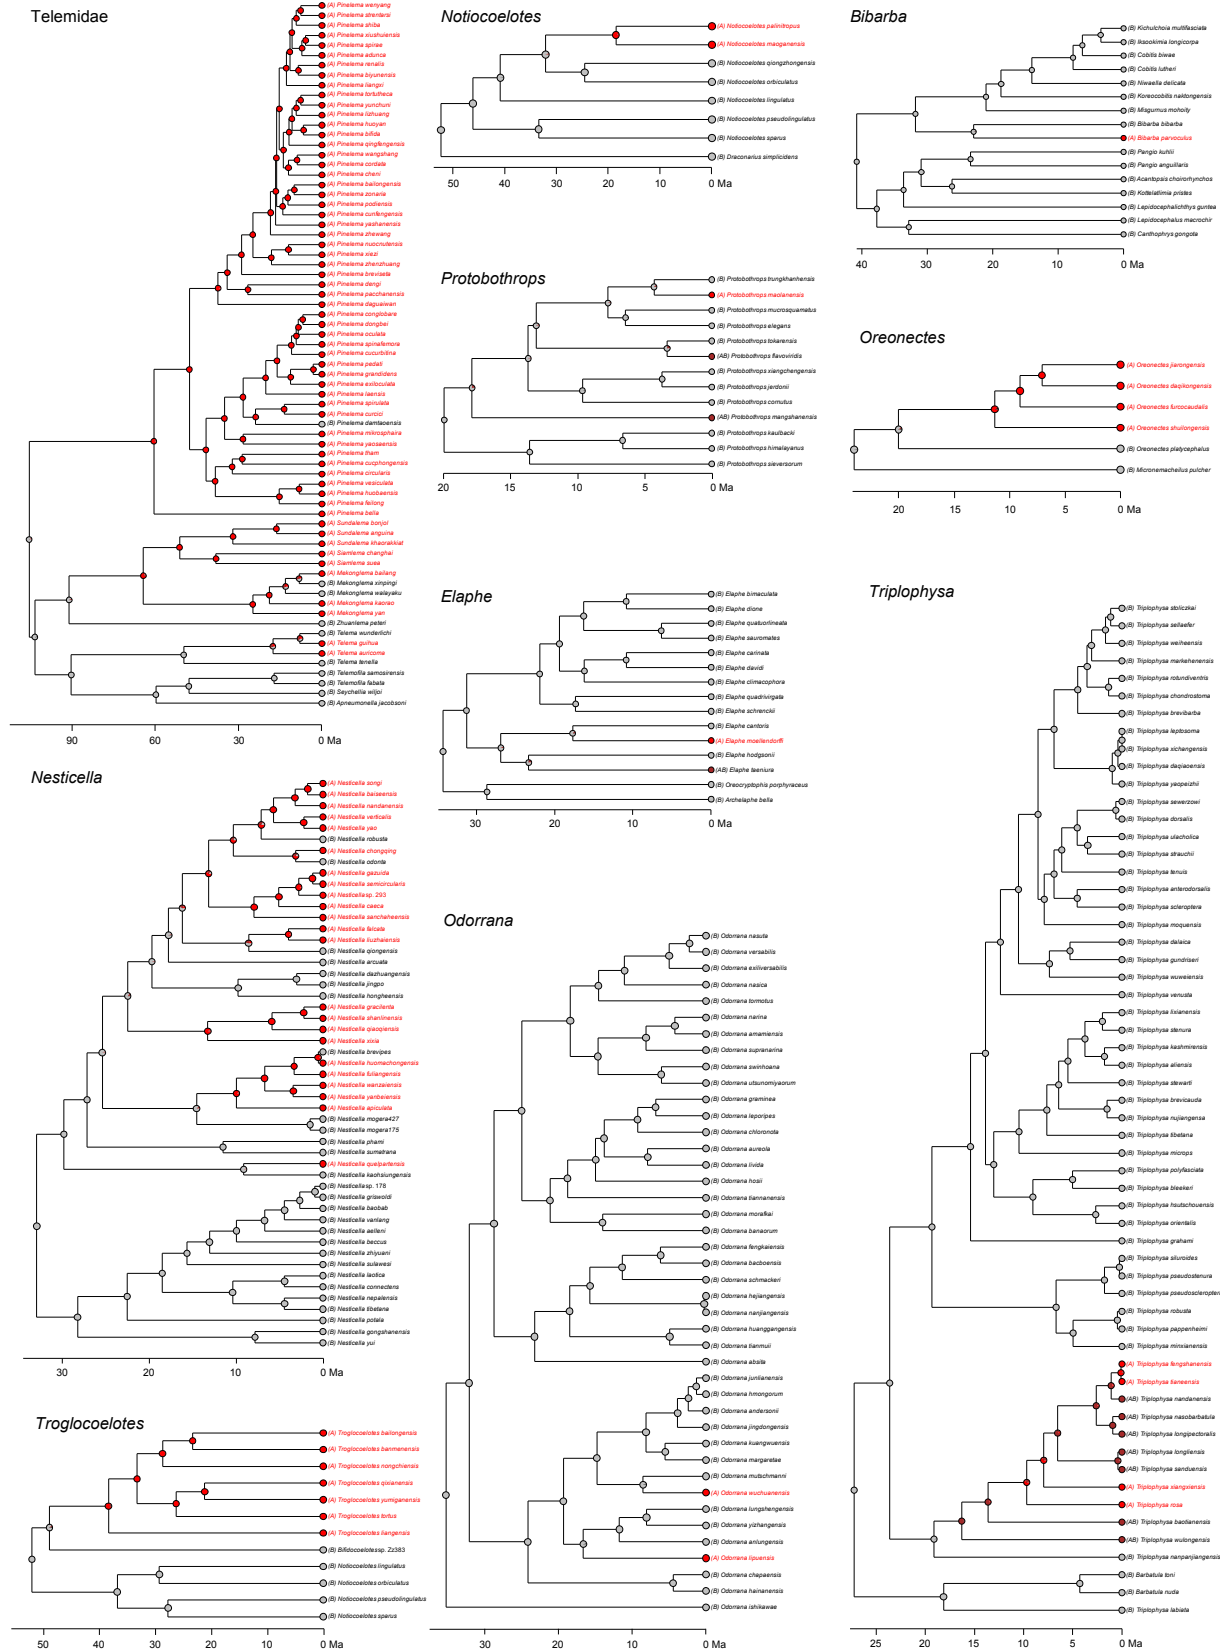

323 ● A: Hypogean ● B: Epigean ● AB

D

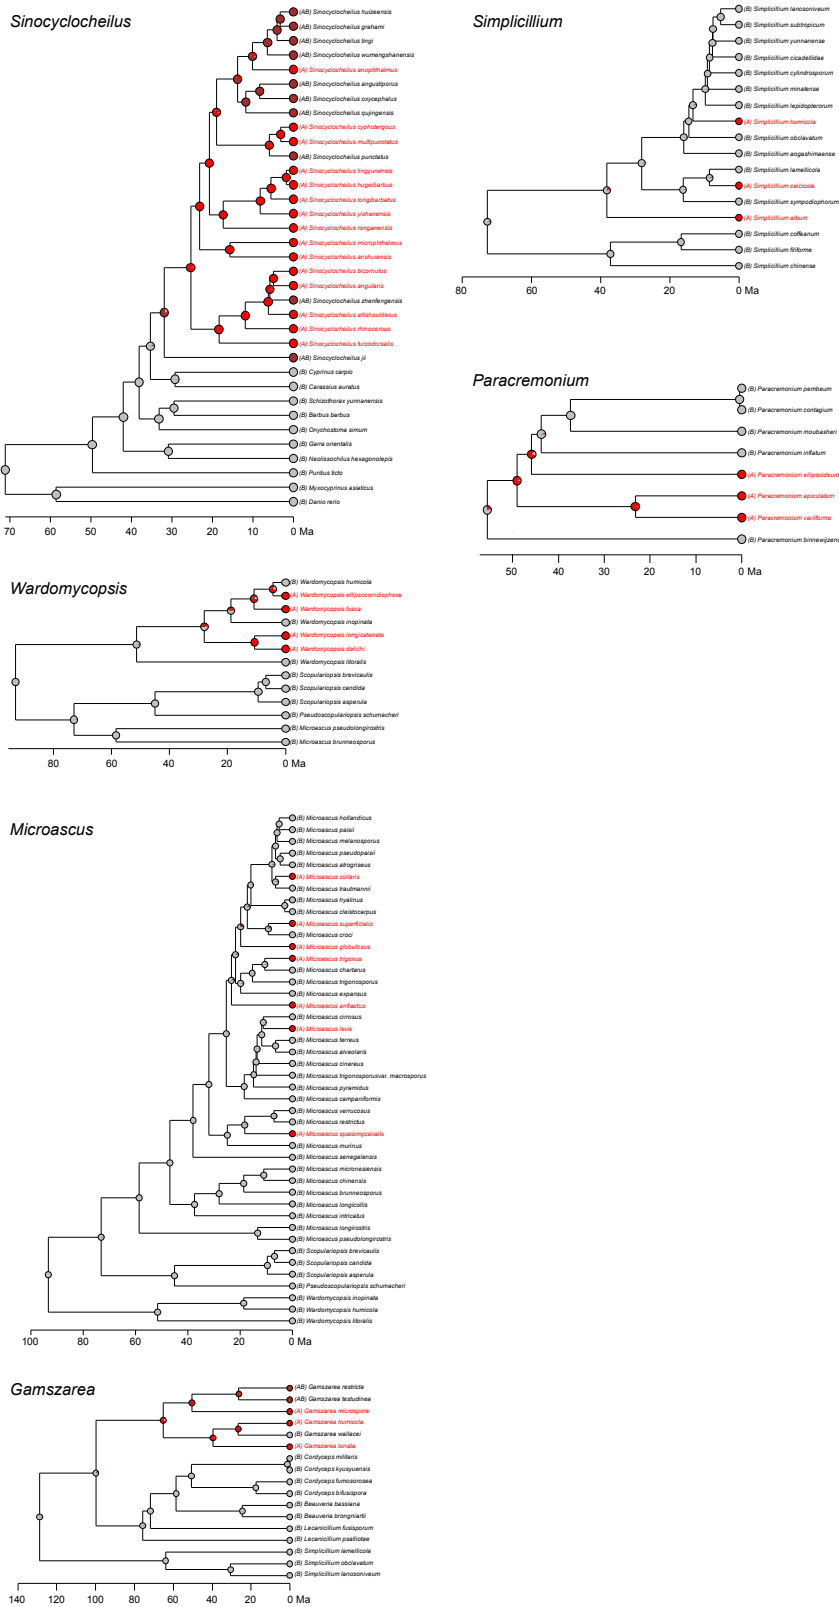

326 **Fig. S3. Ancestral habitat reconstructions of the 28 clades investigated.** (A) Ancestral habitat  
327 reconstructions for *Polystichum*, *Hymenasplenium*, *Lysimachieae*, *Mitreola*, and *Primulina*. (B)  
328 Ancestral habitat reconstructions for *Petrocodon*, *Petrocosmea*, *Hemiboea*, *Lysionotus*,  
329 *Paraboea*, *Elatostema*, and the Asian *Begonia* clade. (C) Ancestral habitat reconstructions for  
330 *Telemidae*, *Nesticella*, *Troglocoelotes*, *Notiocoelotes*, *Protobothrops*, *Elaphe*, *Odorrana*,  
331 *Bibarba*, *Oreonectes*, and *Triplophysa*. (D) Ancestral habitat reconstructions for  
332 *Sinocyclocheilus*, *Wardomycopsis*, *Microascus*, *Gamszarea*, *Simplicillium*, and *Paracremonium*.  
333 See Materials and Methods for further details. Pie charts on each node show marginal  
334 probabilities for each alternative ancestral habitat derived from the Bayesian binary Markov  
335 chain Monte Carlo (BBM) method in RASP. Endemic cave-dwelling species are shown in red,  
336 and other sampled species are in black.



337 **Fig. S4.**

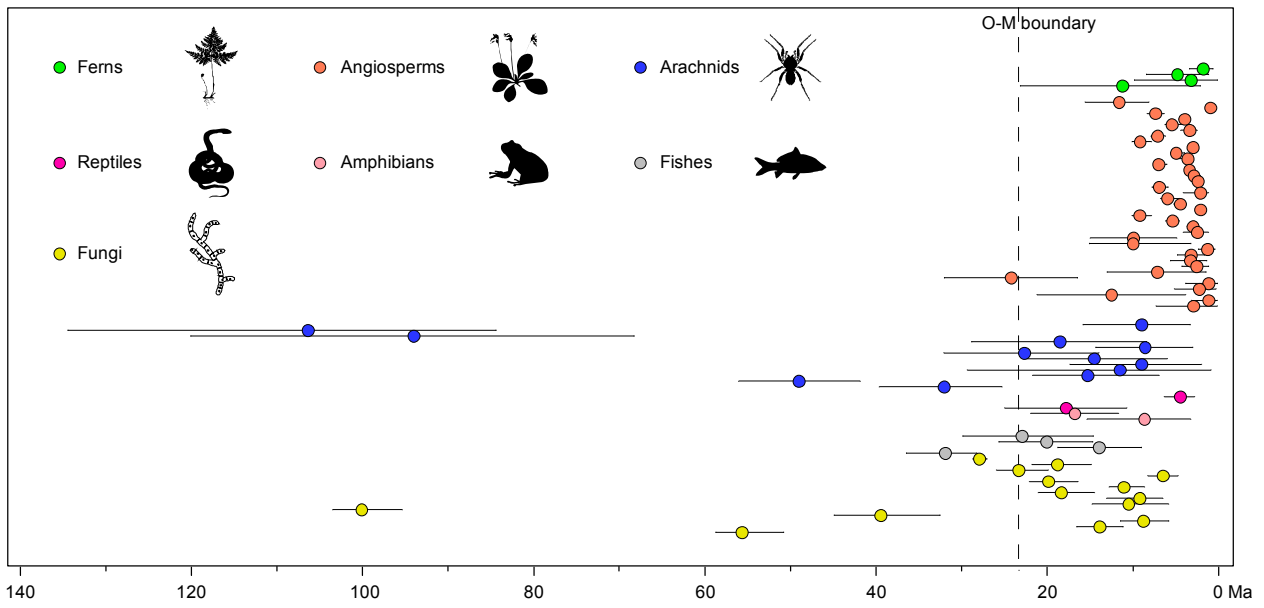

338

339 **Fig. S4. Ages of origination of endemic cave-dwelling species/lineages derived from**  
340 **molecular dating (averages and 95% credible intervals).** The vertical dashed line indicates  
341 the Oligocene-Miocene (O-M) boundary. For details, see *SI Appendix*, Table S4 and Fig. S2.

342 **Fig. S5.**

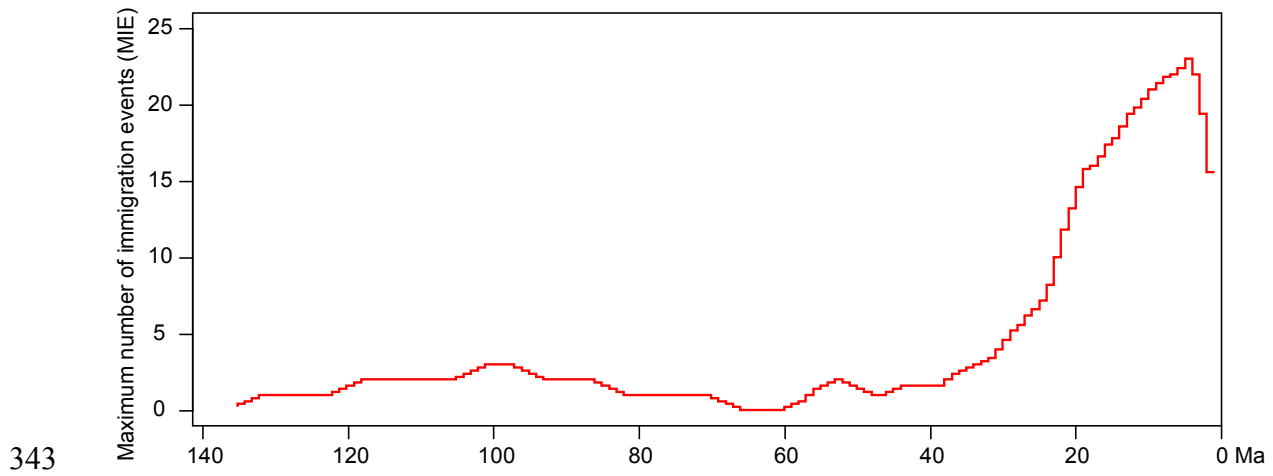

344 **Fig. S5. MIE for biotic colonization of subtropical East Asian caves.**

345 **Fig. S6.**

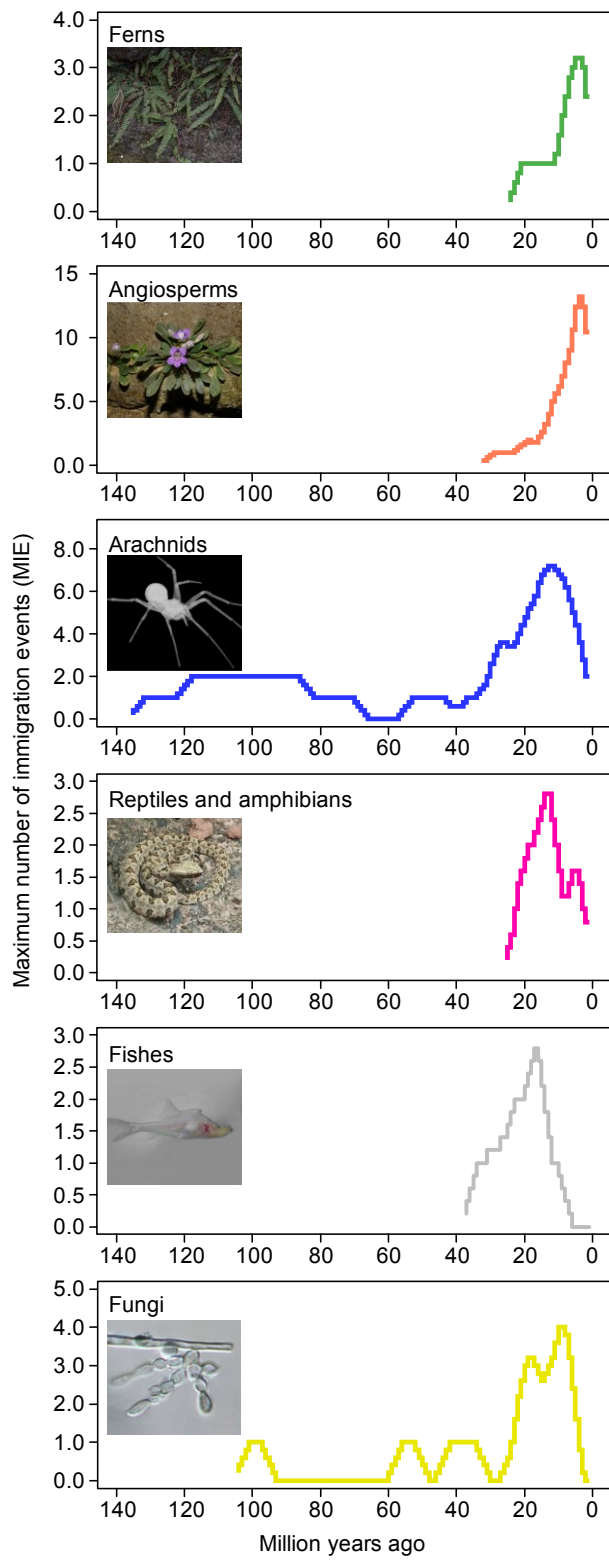

346

347 **Fig. S6. MIEs for different clades of organisms for biotic adaptation to subtropical East**

348 **Asian caves.**

A

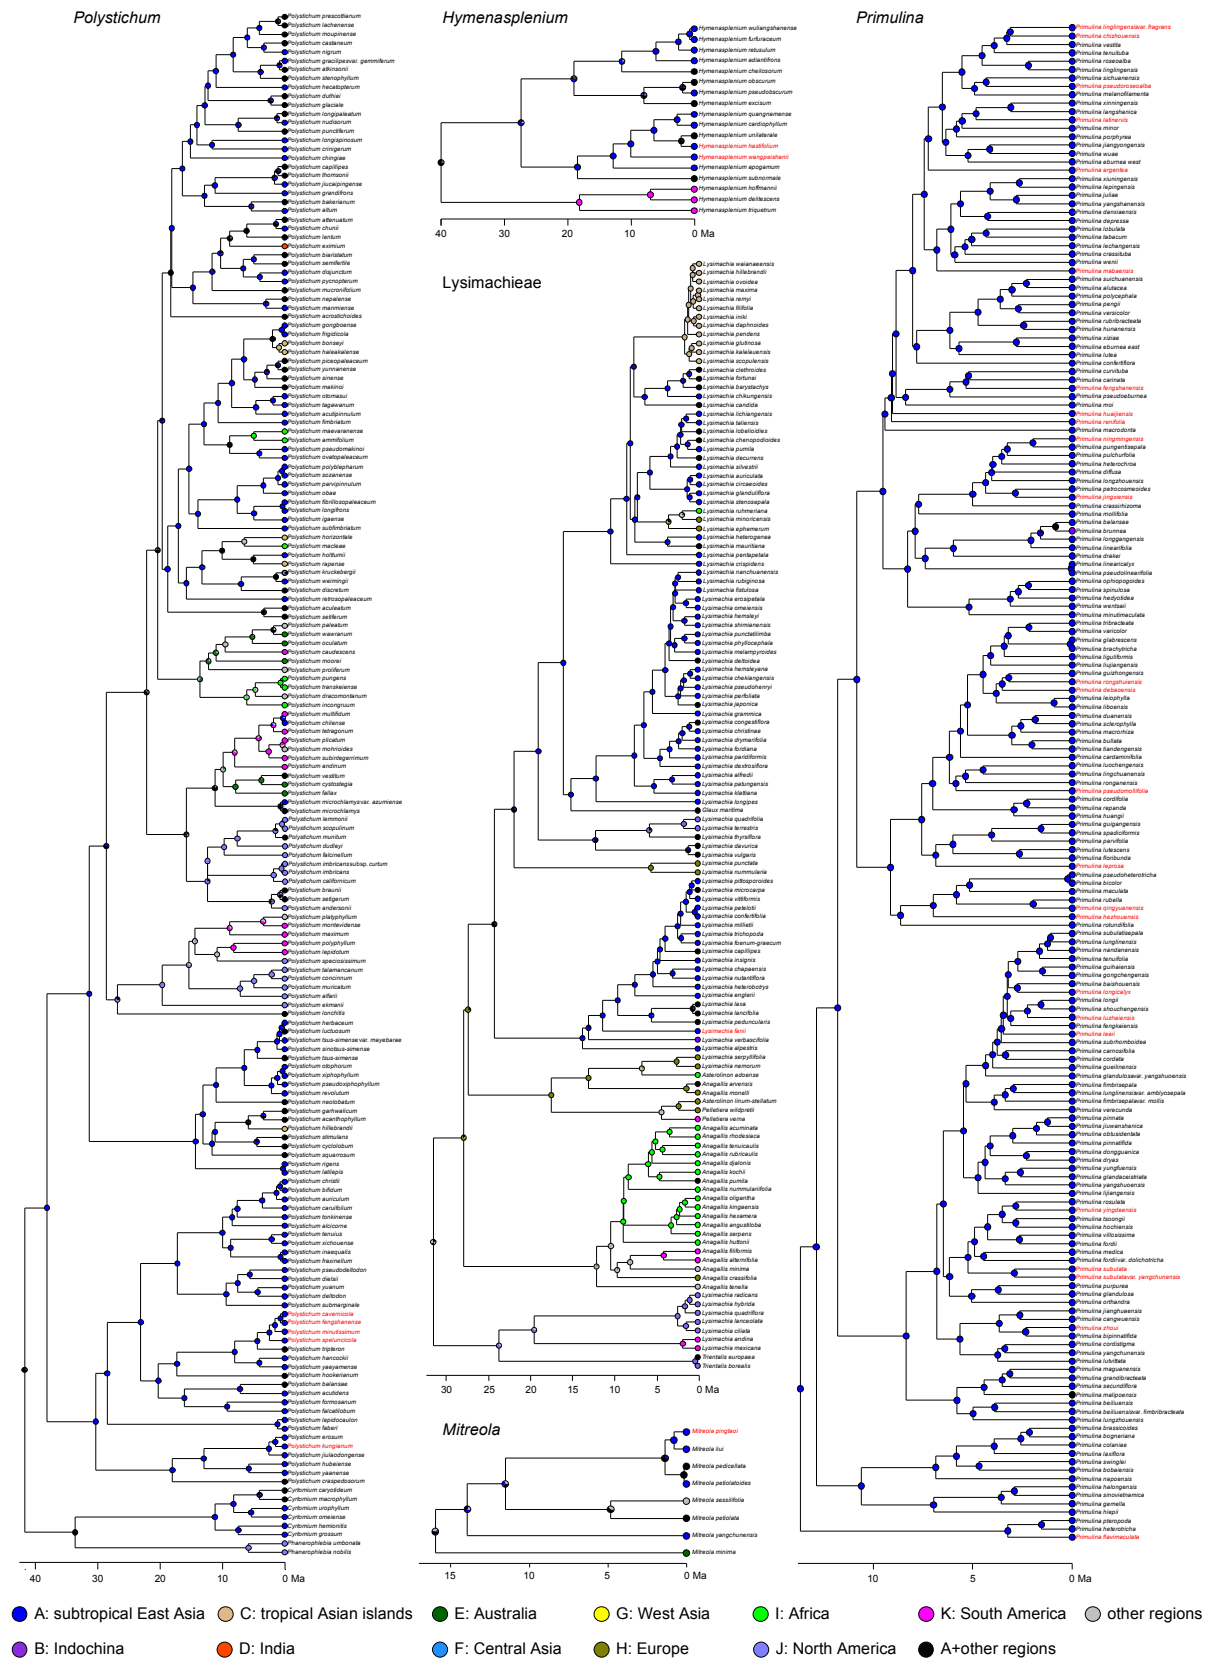

B

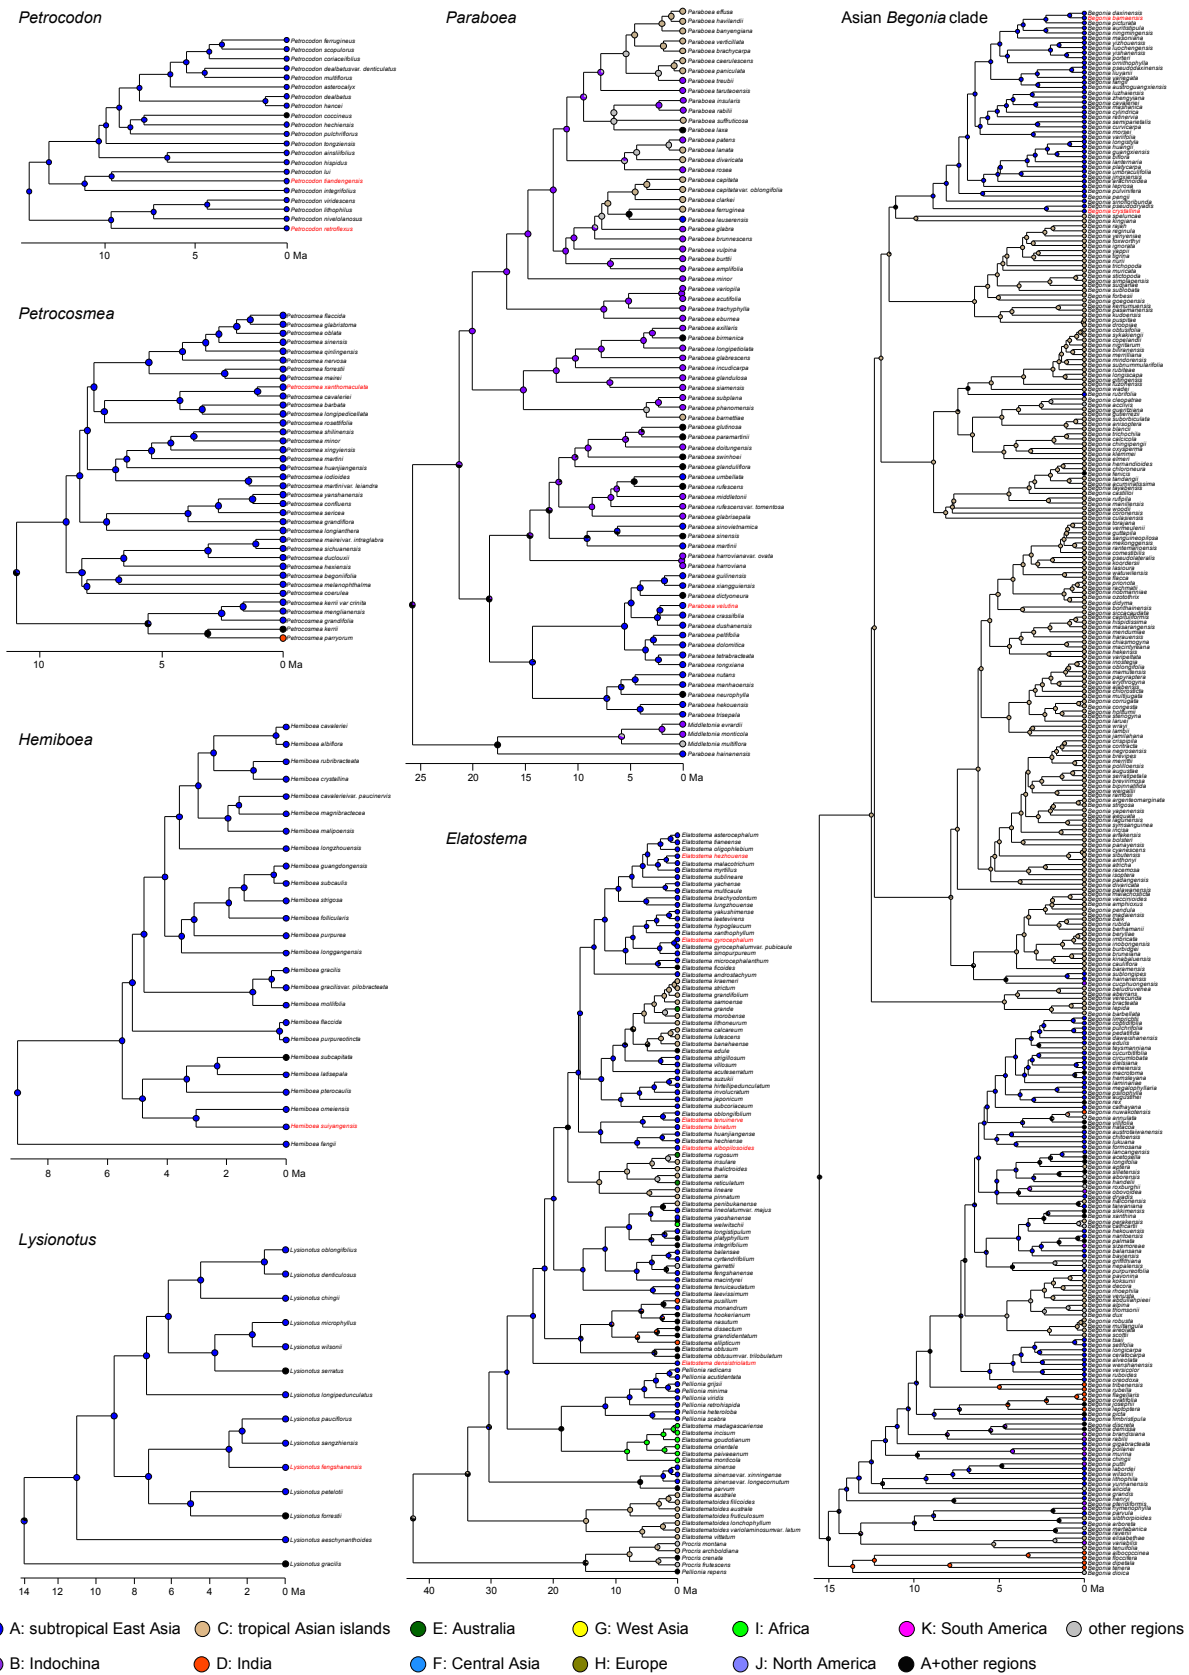

C

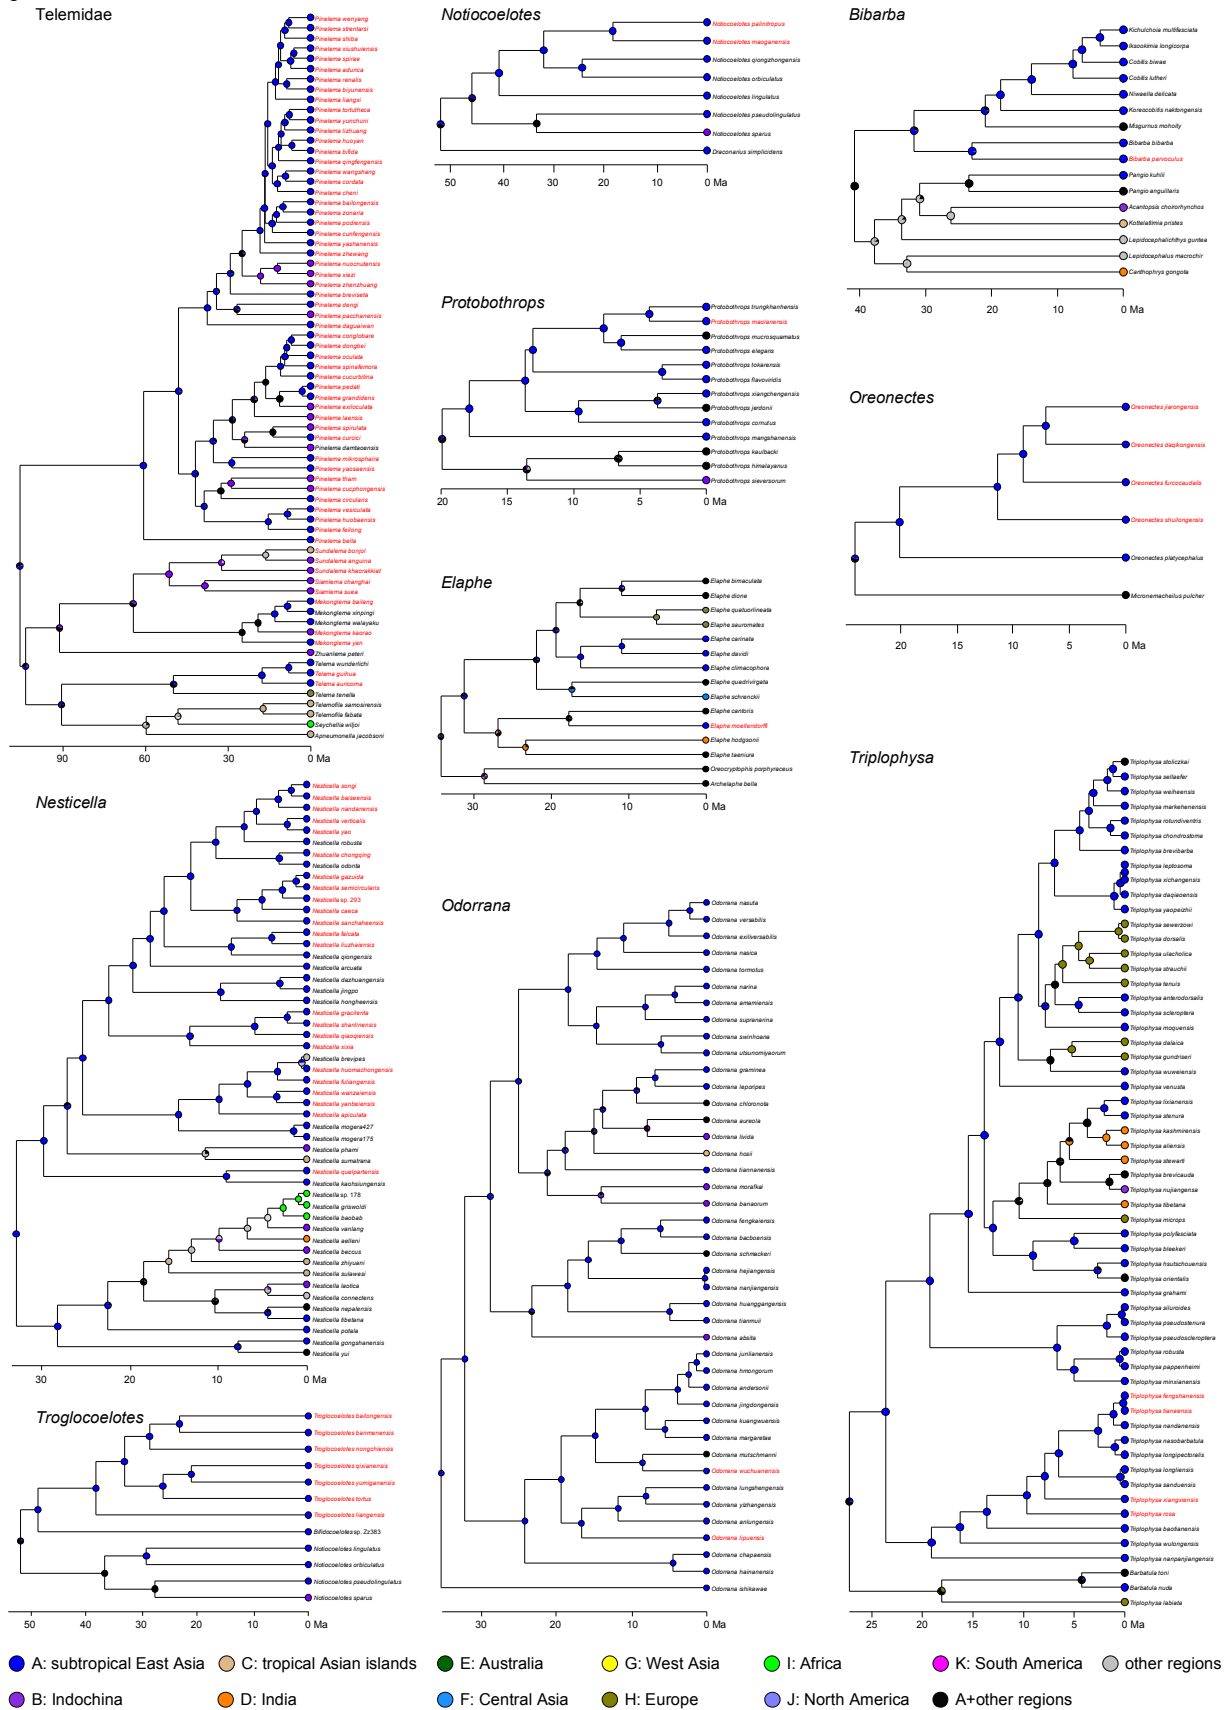

D

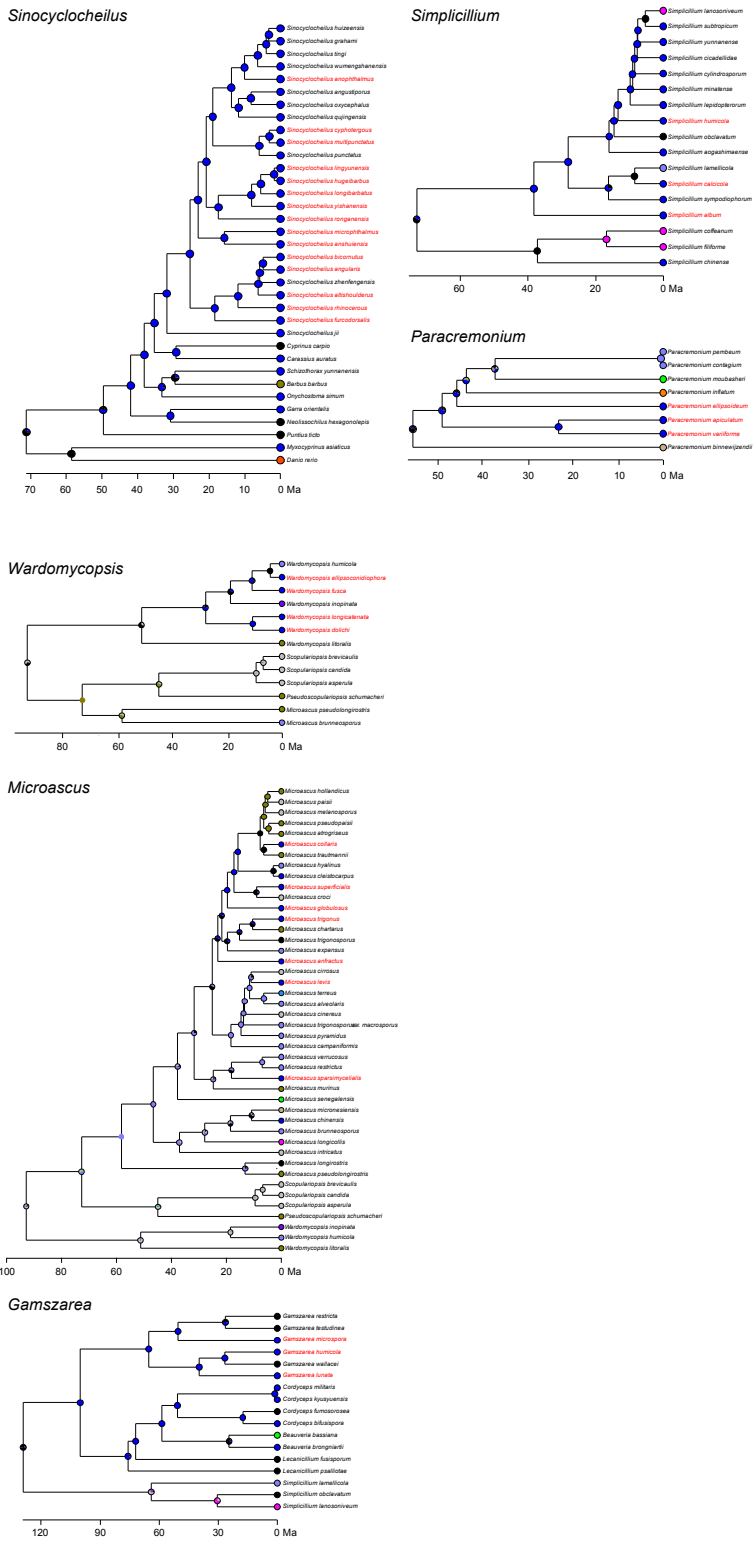

- A: subtropical East Asia
- B: Indochina
- C: tropical Asian islands
- D: India
- E: Australia
- F: Central Asia
- G: West Asia
- H: Europe
- I: Africa
- J: North America
- K: South America
- other regions
- A+other regions

357 **Fig. S7. Ancestral range reconstructions of the 28 clades investigated.** (A) Ancestral range  
358 reconstructions for *Polystichum*, *Hymenasplenium*, Lysimachieae, *Mitreola*, and *Primulina*. (B)  
359 Ancestral range reconstructions for *Petrocodon*, *Petrocosmea*, *Hemiboea*, *Lysionotus*, *Paraboea*,  
360 *Elatostema*, and Asian *Begonia* clade. (C) Ancestral range reconstructions for Telemidae,  
361 *Nesticella*, *Troglocoelotes*, *Notiocoelotes*, *Protobothrops*, *Elaphe*, *Odorrana*, *Bibarba*,  
362 *Oreonectes*, and *Triplophysa*. (D) Ancestral range reconstructions for *Sinocyclocheilus*,  
363 *Wardomyopsis*, *Microascus*, *Gamszarea*, *Simplicillium*, and *Paracremonium*. See Materials and  
364 Methods for further details. Pie charts on each node show the relative probabilities of alternative  
365 ancestral areas derived from the Dispersal-Extinction-Cladogenesis (DEC) method in  
366 BioGeoBEARS. Endemic cave-dwelling species are shown in red, and other sampled species are  
367 in black.



A

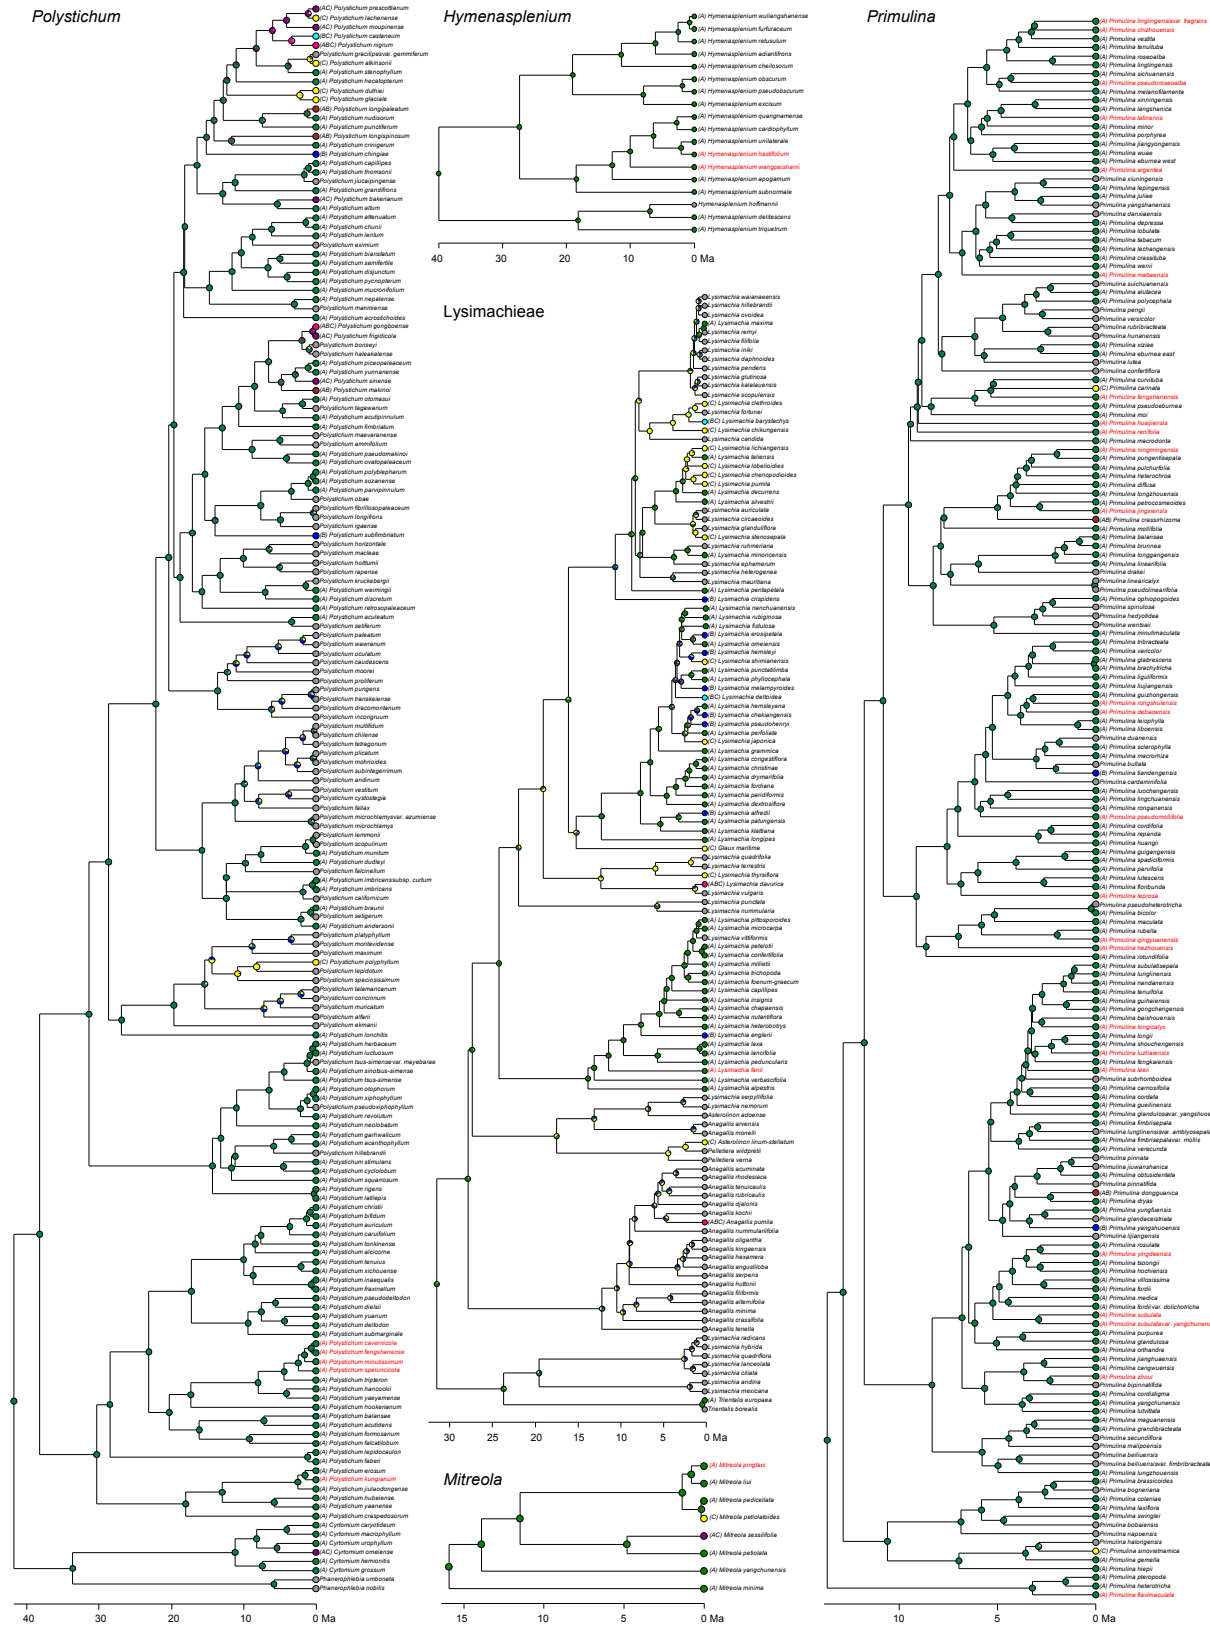

369 ● A: Forest ● B: Mountain shrub ● C: Meadow ● AB ● AC ● BC ● ABC ● Unknown

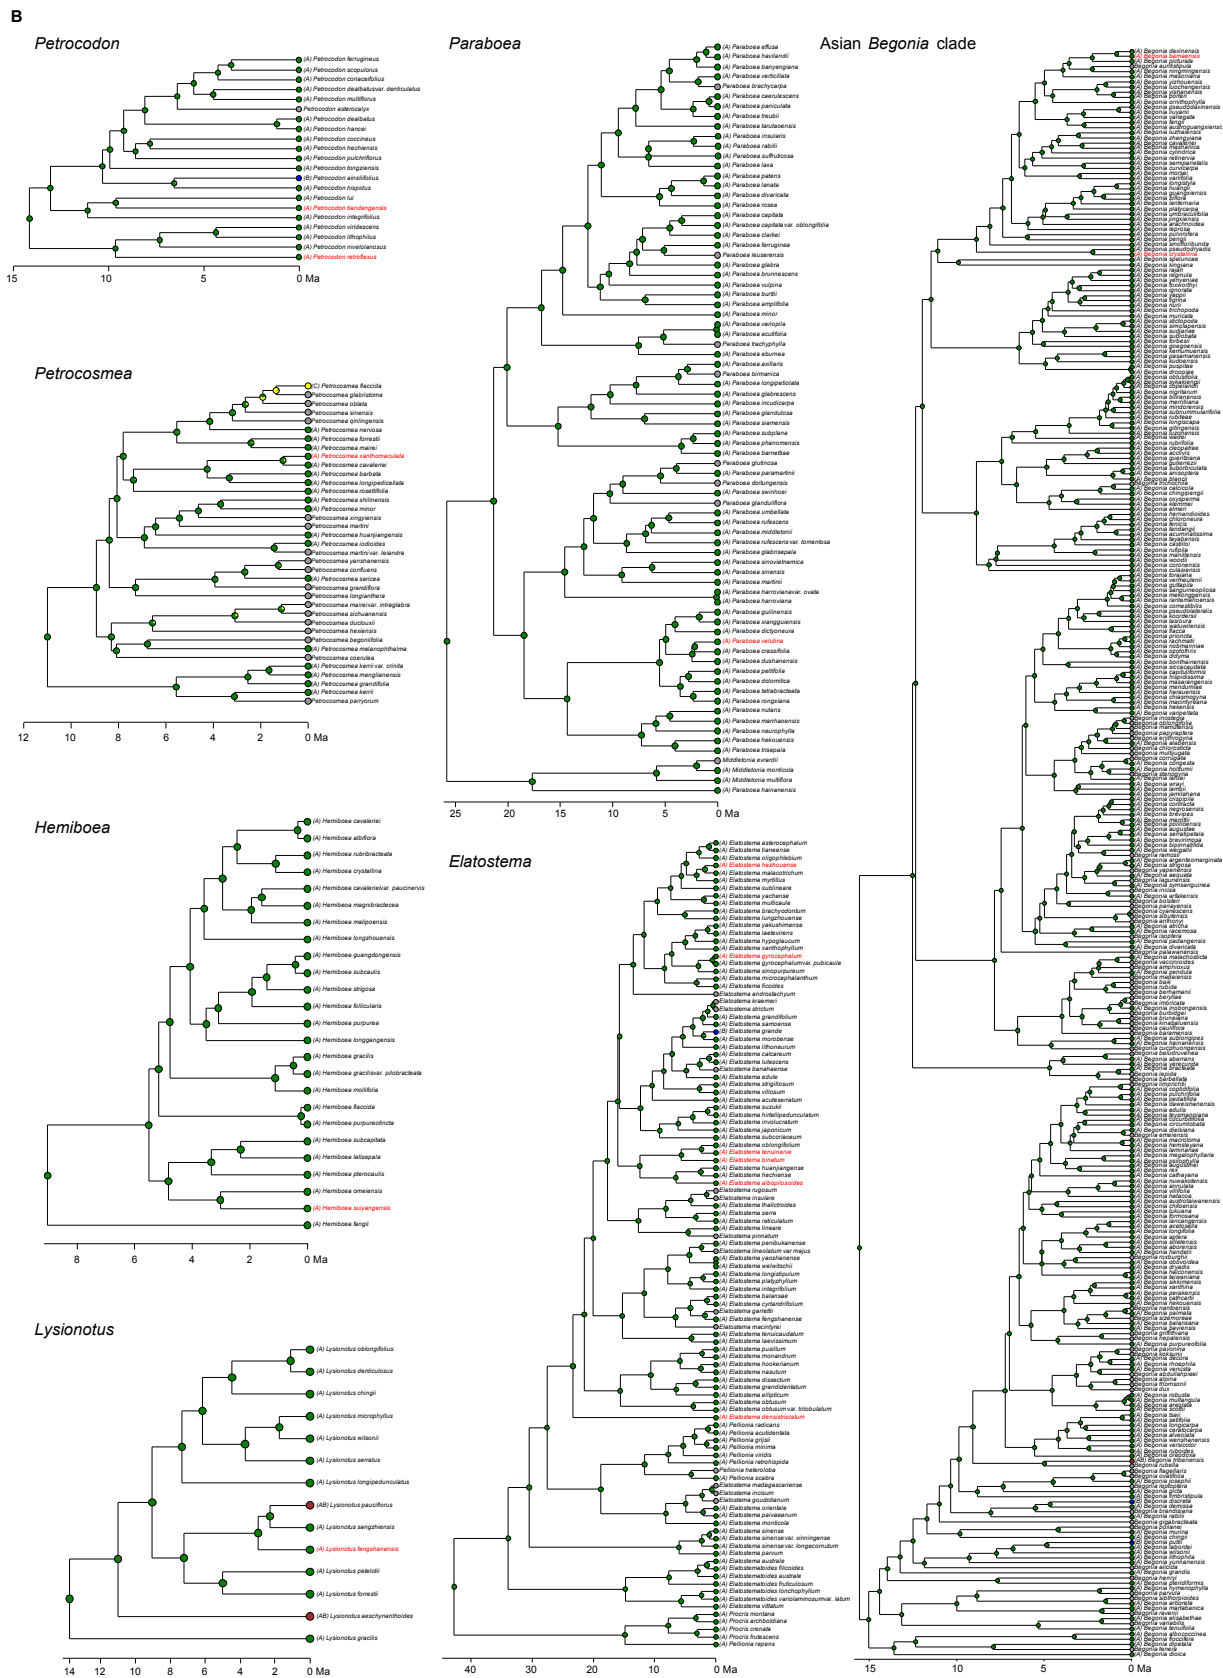

c

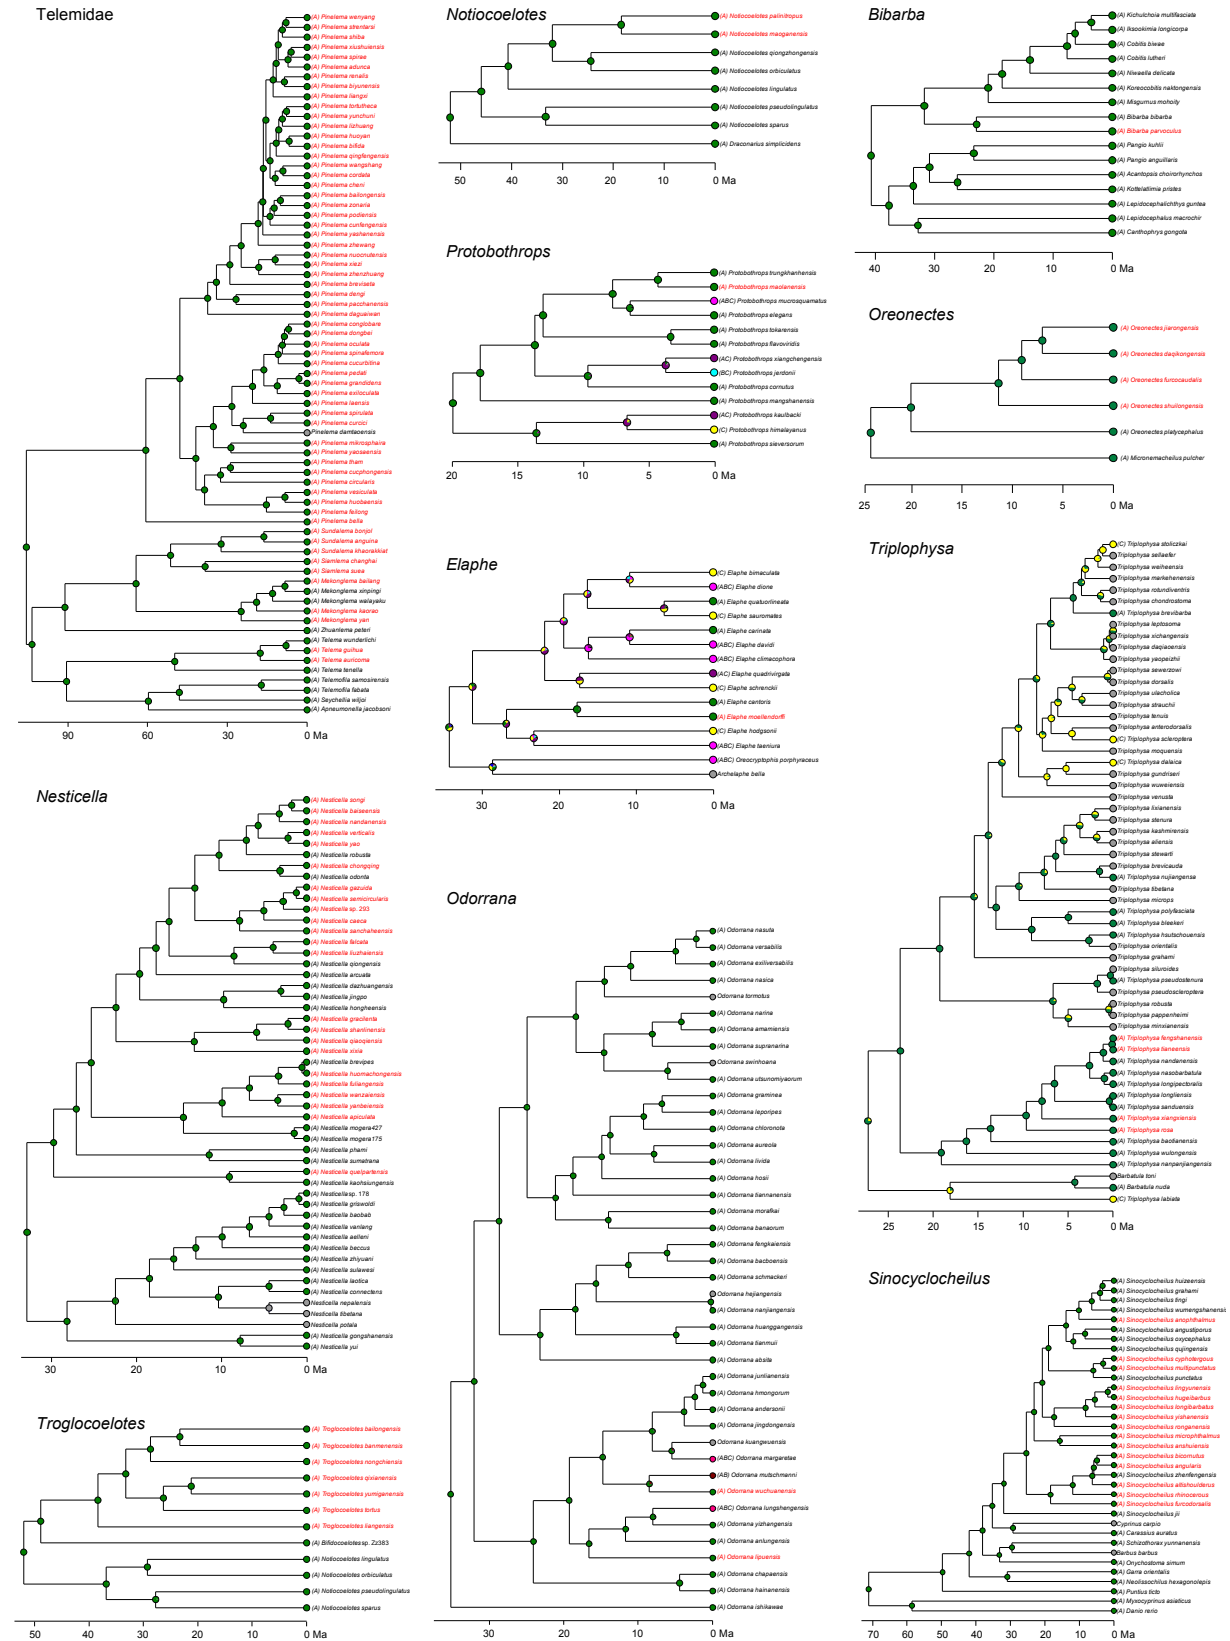

374 **Fig. S8. Reconstruction of ancestral vegetation types for 23 clades.** (A) Reconstructions of  
375 ancestral vegetation types for *Polystichum*, *Hymenasplenium*, Lysimachieae, *Mitreola*, and  
376 *Primulina*. (B) Reconstructions of ancestral vegetation types for *Petrocodon*, *Petrocosmea*,  
377 *Hemiboea*, *Lysionotus*, *Paraboea*, *Elatostema*, and the Asian *Begonia* clade. (C) Reconstructions  
378 of ancestral vegetation types for Telemidae, *Nesticella*, *Troglocoelotes*, *Notiocoelotes*,  
379 *Protobothrops*, *Elaphe*, *Odorrana*, *Bibarba*, *Oreonectes*, *Triplophysa*, and *Sinocyclocheilus*. See  
380 Materials and Methods for further details. Pie charts on each node show marginal probabilities  
381 for each alternative ancestral vegetation type derived from the Bayesian binary Markov chain  
382 Monte Carlo (BBM) method in RASP. Endemic cave-dwelling species are printed in red, and  
383 other sampled species are in black.

384 **Fig. S9.**

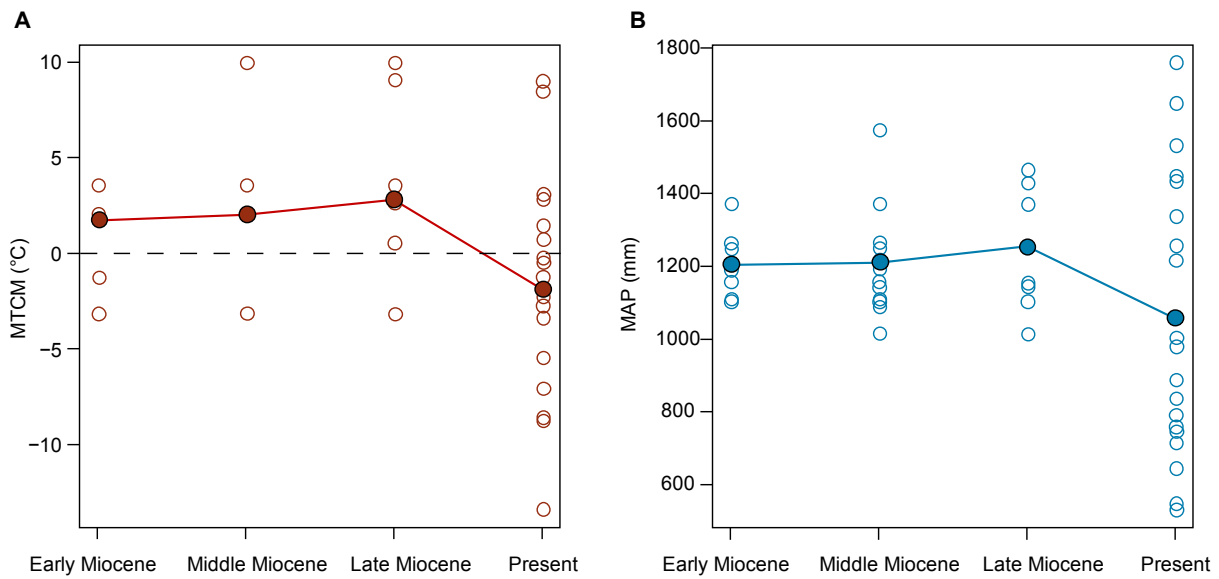

385

386 **Fig. S9. Reconstructed paleo-temperature (°C) and paleo-precipitation (mm) in subtropical**

387 **East Asia.** (A) The Minimum Temperature of the Coldest Month (MTCM). The dashed line

388 indicates the non-freezing boundary ( $\geq 0$  °C). (B) The Mean Annual Precipitation (MAP). Black

389 dots represent the mean value, whereas the open circles show the raw data (see details in *SI*

390 *Appendix*, Table S6).

391 **Table S1. Summary of the caves that were dated in southern China**

| Period                            | Location        | Method   | Reference |
|-----------------------------------|-----------------|----------|-----------|
| Carboniferous to Early Cretaceous | Leshan, Sichuan | Fossil   | (37)      |
| Middle to Late Triassic           | Guilin, Guangxi | Sediment | (38)      |
| Yanshan Period                    | Hunan           | Sediment | (39)      |
| Before the Early Cenozoic         | Bama, Guangxi   | Sediment | (40)      |
| Eocene to Early Oligocene         | Lunan, Yunnan   | Sediment | (41)      |

392 **Table S2. Sampling information for the selected 28 clades analyzed in this study**

| Family          | Genus/clade                | Total species | Sampled species (%) | Sampled cave species (endemic) | Reference |
|-----------------|----------------------------|---------------|---------------------|--------------------------------|-----------|
| Dryopteridaceae | <i>Polystichum</i>         | 500           | 163 (33)            | 8 (5)                          | (42)      |
| Aspleniaceae    | <i>Hymenasplenium</i>      | 50            | 18 (36)             | 2 (2)                          | (3)       |
| Primulaceae     | Lysimachieae               | 250           | 126 (50)            | 1 (1)                          | (8)       |
| Loganiaceae     | <i>Mitreola</i>            | 14            | 8 (50)              | 2 (1)                          | (43)      |
| Gesneriaceae    | <i>Primulina</i>           | 227           | 181 (80)            | 51 (25)                        | (44)      |
| Gesneriaceae    | <i>Petrocodon</i>          | 33            | 21 (64)             | 3 (2)                          | (45)      |
| Gesneriaceae    | <i>Petrocosmea</i>         | 50            | 37 (74)             | 3 (1)                          | (46)      |
| Gesneriaceae    | <i>Hemiboea</i>            | 34            | 25 (74)             | 1 (1)                          | (47)      |
| Gesneriaceae    | <i>Lysionotus</i>          | 25            | 14 (56)             | 1 (1)                          | (48)      |
| Gesneriaceae    | <i>Paraboea</i>            | 130           | 76 (58)             | 2 (1)                          | (49)      |
| Urticaceae      | <i>Elatostema</i>          | 500           | 88 (18)             | 22 (6)                         | (13)      |
| Begoniaceae     | Asian <i>Begonia</i> clade | 968           | 317 (33)            | 15 (2)                         | (50)      |
| Telemidae       | Telemidae                  | 85            | 73 (86)             | 61 (61)                        | (51)      |
| Nesticidae      | <i>Nesticella</i>          | 72            | 48 (66)             | 23 (23)                        | (20)      |
| Agelenidae      | <i>Troglocoelotes</i>      | 7             | 7 (100)             | 7 (7)                          | (52)      |
| Agelenidae      | <i>Notiocoelotes</i>       | 13            | 7 (54)              | 2 (2)                          | (53)      |
| Viperidae       | <i>Protobothrops</i>       | 17            | 14 (82)             | 3 (1)                          | (54)      |
| Colubridae      | <i>Elaphe</i>              | 16            | 13 (81)             | 2 (1)                          | (54)      |
| Ranidae         | <i>Odorrana</i>            | 59            | 41 (69)             | 2 (2)                          | (55)      |
| Cobitidae       | <i>Bibarba</i>             | 3             | 2 (67)              | 1 (1)                          | (56)      |
| Nemacheilidae   | <i>Oreonectes</i>          | 7             | 5 (71)              | 4 (4)                          | (57)      |
| Nemacheilidae   | <i>Triplophysa</i>         | 140           | 56 (40)             | 11 (4)                         | (58)      |
| Cyprinidae      | <i>Sinocyclocheilus</i>    | 76            | 25 (33)             | 25 (15)                        | (31)      |
| Microascaceae   | <i>Wardomycopsis</i>       | 8             | 7 (88)              | 4 (4)                          | (59)      |
| Microascaceae   | <i>Microascus</i>          | 37            | 28 (76)             | 7 (7)                          | (59)      |
| Cordycipitaceae | <i>Gamszarea</i>           | 10            | 6 (60)              | 5 (3)                          | (59)      |
| Cordycipitaceae | <i>Simplicillium</i>       | 19            | 19 (100)            | 3 (3)                          | (59)      |
| Nectriaceae     | <i>Paracremonium</i>       | 8             | 8 (100)             | 3 (3)                          | (59)      |

393 **Table S3. Endemic cave-dwelling species sampled in this study**

| Species                                             | Clade of life | Distribution within caves | Justification for inference of cave endemism                                                                                                                                                                                                                                                         |
|-----------------------------------------------------|---------------|---------------------------|------------------------------------------------------------------------------------------------------------------------------------------------------------------------------------------------------------------------------------------------------------------------------------------------------|
| <i>Polystichum cavernicola</i>                      | Fern          | -                         | <i>Polystichum cavernicola</i> was reported by He and Zhang (60); this species is only found in a karst cave.                                                                                                                                                                                        |
| <i>Polystichum fengshanense</i>                     | Fern          | Entrance & twilight zones | Zhang and He (61) first described <i>Polystichum fengshanense</i> ; it occurs in wet, weathered soil on cave walls, on growing stalagmites, and in limestone fissures inside caves. Monro et al. (62) further confirmed that this species is only known from caves based on their field expeditions. |
| <i>Polystichum kungianum</i>                        | Fern          | Entrance zone             | Based on He and Zhang (63), <i>Polystichum kungianum</i> only occurs on shady moist limestone walls at the edge of a small northeast-facing, downward-sloping karst cave.                                                                                                                            |
| <i>Polystichum minutissimum</i>                     | Fern          | Entrance zone             | Zhang and He (64) first described <i>Polystichum minutissimum</i> ; it is only found on dripping limestone walls and stalactites, ca. 10 m from the entrance inside a karst cave. Monro et al. (62) further confirmed that this species is cave-endemic based on their field expeditions.            |
| <i>Polystichum speluncicola</i>                     | Fern          | -                         | Based on Zhang and He (65), <i>Polystichum speluncicola</i> is only known from the wall of an inactive stalagmite inside a karst cave, ca. 20 m from the cave entrance.                                                                                                                              |
| <i>Hymenasplenium hastifolium</i>                   | Fern          | Entrance zone             | Based on Xu et al. (66), <i>Hymenasplenium hastifolium</i> only grows on limestone walls/floor at a cave entrance in the subtropical evergreen broadleaved forest on a karst mountain.                                                                                                               |
| <i>Hymenasplenium wangpeishanii</i>                 | Fern          | -                         | Based on Xu et al. (67), <i>Hymenasplenium wangpeishanii</i> is only known from a limestone cave with humid and shady conditions.                                                                                                                                                                    |
| <i>Lysimachia fanii</i>                             | Angiosperm    | Entrance zone             | Based on Huang et al. (68), <i>Lysimachia fanii</i> is only found in a limestone cave.                                                                                                                                                                                                               |
| <i>Mitreola pingtaoi</i>                            | Angiosperm    | Entrance & twilight zones | Fang et al. (69) first described <i>Mitreola pingtaoi</i> , which is only found in a limestone cave. Monro et al. (62) further confirmed that this species is cave-endemic based on their field expeditions.                                                                                         |
| <i>Primulina linglingensis</i> var. <i>fragrans</i> | Angiosperm    | Entrance zone             | Based on Ge et al. (70), <i>Primulina linglingensis</i> var. <i>fragrans</i> only occurs on a shaded and damp rocky tufa surface of a limestone cliff in a large cave, close to the entrance.                                                                                                        |
| <i>Primulina chizhouensis</i>                       | Angiosperm    | Entrance zone             | Based on Hong et al. (71), <i>Primulina chizhouensis</i> is only known from rocky crevices on moist shady cliffs at the entrance of a limestone cave.                                                                                                                                                |
| <i>Primulina pseudoroseoalba</i>                    | Angiosperm    | Entrance zone             | Based on Li et al. (72), <i>Primulina pseudoroseoalba</i> is only known from rocky crevices at the entrance of a limestone cave.                                                                                                                                                                     |
| <i>Primulina latinervis</i>                         | Angiosperm    | Entrance zone             | Based on Wang (73), <i>Primulina latinervis</i> is only found on damp rocks of cave entrances.                                                                                                                                                                                                       |
| <i>Primulina argentea</i>                           | Angiosperm    | Entrance zone             | Based on Hong et al. (74), <i>Primulina argentea</i> is only known from a karst cave.                                                                                                                                                                                                                |
| <i>Primulina mabaensis</i>                          | Angiosperm    | -                         | Based on Chung et al. (75), <i>Primulina mabaensis</i> is only known from a karst cave.                                                                                                                                                                                                              |



|                                                     |            |                           |                                                                                                                                                                                                                           |
|-----------------------------------------------------|------------|---------------------------|---------------------------------------------------------------------------------------------------------------------------------------------------------------------------------------------------------------------------|
| <i>Primulina fengshanensis</i>                      | Angiosperm | Entrance zone             | Wen et al. (76) first described this species; it is only found on a moist rock surface in a large limestone cave. Monro et al. (62) further confirmed that this species is cave-endemic based on their field expeditions. |
| <i>Primulina huaijiensis</i>                        | Angiosperm | -                         | Based on Feng et al. (77), <i>Primulina huaijiensis</i> is only known from a limestone karst cave.                                                                                                                        |
| <i>Primulina renifolia</i>                          | Angiosperm | Entrance & twilight zones | Fang and Qin (78) first described this species; it is only known from a limestone cave. Monro et al. (62) further confirmed that this species is cave-endemic based on their field expeditions.                           |
| <i>Primulina ningmingensis</i>                      | Angiosperm | Entrance zone             | Based on Wu et al. (79), <i>Primulina ningmingensis</i> is only known from the entrance of a limestone cave.                                                                                                              |
| <i>Primulina jingxiensis</i>                        | Angiosperm | -                         | Xu et al. (80) first described this species; it only occurs on a moist limestone rock face in a karst cave. Wei et al. (81) further confirmed that this species is cave-endemic based on their field expeditions.         |
| <i>Primulina rongshuiensis</i>                      | Angiosperm | Entrance zone             | Based on Huang et al. (82), <i>Primulina rongshuiensis</i> is only known from the entrance zone of a karst cave.                                                                                                          |
| <i>Primulina debaoensis</i>                         | Angiosperm | Entrance zone             | Jiang and Li (83) first described this species; it is found in a large limestone cave. Monro et al. (62) confirmed that this species is only known from caves based on their field expeditions.                           |
| <i>Primulina pseudomollifolia</i>                   | Angiosperm | Entrance zone             | Based on Xu et al. (84), <i>Primulina pseudomollifolia</i> is only found on moist limestone rock faces at the entrance to karst caves.                                                                                    |
| <i>Primulina leprosa</i>                            | Angiosperm | Entrance zone             | Based on Xu et al. (85), <i>Primulina leprosa</i> only grows on moist rock faces at the entrance of a karst cave.                                                                                                         |
| <i>Primulina qingyuanensis</i>                      | Angiosperm | -                         | Based on Ning et al. (86), <i>Primulina qingyuanensis</i> is only found on moist rock faces in a karst cave.                                                                                                              |
| <i>Primulina hezhouensis</i>                        | Angiosperm | Entrance zone             | Wu et al. (87) first described this species; it only occurs on a moist rock face at the entrance of a karst cave. Monro et al. (62) confirmed that this species is cave-endemic based on their field expeditions.         |
| <i>Primulina longicalyx</i>                         | Angiosperm | -                         | Based on Li and Wang (88), <i>Primulina longicalyx</i> is only found sparsely on the soft limestone stalactites at the far end of the famous cave in the Seven-star Park.                                                 |
| <i>Primulina luzhaiensis</i>                        | Angiosperm | -                         | Based on Huang et al. (89), <i>Primulina luzhaiensis</i> is only known from a karst cave.                                                                                                                                 |
| <i>Primulina leei</i>                               | Angiosperm | -                         | Based on Wen et al. (90), <i>Primulina leei</i> is only distributed on the wall of a limestone cave.                                                                                                                      |
| <i>Primulina yingdeensis</i>                        | Angiosperm | -                         | Based on Ning et al. (91), <i>Primulina yingdeensis</i> is only found on the limestone rock surface in a karst cave.                                                                                                      |
| <i>Primulina subulata</i>                           | Angiosperm | -                         | Wang (92) first described this species; it is only found in a limestone cave. Wei et al. (81) confirmed that this species is cave-endemic based on their field expeditions.                                               |
| <i>Primulina subulate</i> var. <i>yangchunensis</i> | Angiosperm | -                         | Wang (93) first described <i>Primulina subulate</i> var. <i>yangchunensis</i> , which is only found in a limestone cave. Wei et al. (81) confirmed that this species is cave-endemic based on                             |

|                                   |            |               |                                                                                                                                                                                                                              |
|-----------------------------------|------------|---------------|------------------------------------------------------------------------------------------------------------------------------------------------------------------------------------------------------------------------------|
|                                   |            |               | their field expeditions.                                                                                                                                                                                                     |
| <i>Primulina zhoui</i>            | Angiosperm | Entrance zone | Xin et al. (94) described <i>Primulina zhoui</i> and found that this species is restricted to the entrance to karst caves.                                                                                                   |
| <i>Primulina flavimaculata</i>    | Angiosperm | -             | Based on Wei et al. (81), <i>Primulina flavimaculata</i> is only found on the wall of a large limestone cave.                                                                                                                |
| <i>Petrocodon tiandengensis</i>   | Angiosperm | -             | Based on Liu et al. (95), <i>Petrocodon tiandengensis</i> is only found on the moist rock face in a limestone cave.                                                                                                          |
| <i>Petrocodon retroflexus</i>     | Angiosperm | -             | Based on Guo et al. (96), <i>Petrocodon retroflexus</i> is restricted to rock faces of a single shaded limestone cave.                                                                                                       |
| <i>Petrocosmea xanthomaculata</i> | Angiosperm | Entrance zone | Gou et al. (97) reported <i>Petrocosmea xanthomaculata</i> and found that it is restricted to a limestone cave.                                                                                                              |
| <i>Hemiboea suiyangensis</i>      | Angiosperm | -             | Li et al. (98) reported <i>Hemiboea suiyangensis</i> and found that it is only known from a limestone cave.                                                                                                                  |
| <i>Lysionotus fengshanensis</i>   | Angiosperm | Entrance zone | Nong et al. (99) first described this species; it only grows at the entrance of a karst cave. Monro et al. (62) confirmed that this species is cave-endemic based on their field expeditions.                                |
| <i>Paraboea velutina</i>          | Angiosperm | Entrance zone | Wang (100) first described this species; it is only found on rock faces of a limestone cave. Wei et al. (81) and Monro et al. (62) confirmed that this species is cave-endemic based on their field expeditions.             |
| <i>Elatostema hezhouense</i>      | Angiosperm | Entrance zone | Wei et al. (81) first described this species and considered it to be endemic to caves. Monro et al. (62) confirmed that this species is cave-endemic based on their field expeditions.                                       |
| <i>Elatostema gyrocephalum</i>    | Angiosperm | Entrance zone | Wang and Wei (101) first described this species; it is only found in a karst cave. Monro et al. (62) confirmed that this species is cave-endemic based on their field expeditions.                                           |
| <i>Elatostema tenuinerve</i>      | Angiosperm | Entrance zone | Wei and Wang (102) first described this species; it is only found on the wall of a limestone cave. Monro et al. (62) confirmed that this species is cave-endemic based on their field expeditions.                           |
| <i>Elatostema binatum</i>         | Angiosperm | Entrance zone | Wang and Wei (101) first described <i>Elatostema binatum</i> ; it is restricted to a limestone cave. Monro et al. (62) confirmed that this species is cave-endemic based on their field expeditions.                         |
| <i>Elatostema albopilosoides</i>  | Angiosperm | Entrance zone | Lin and Duan (103) reported <i>Elatostema albopilosoides</i> , which is only known from a large limestone cave.                                                                                                              |
| <i>Elatostema densistriolatum</i> | Angiosperm | Entrance zone | Wu et al. (104) first described <i>Elatostema densistriolatum</i> ; it is only found in a limestone cave. Monro et al. (62) confirmed that this species is cave-endemic based on their field expeditions.                    |
| <i>Begonia bamaensis</i>          | Angiosperm | Entrance zone | Liu et al. (105) first described this species; it only occurs on semi-shady rocky cliffs at the entrance of limestone caves. Monro et al. (62) confirmed that this species is cave-endemic based on their field expeditions. |

|                               |            |           |                                                                                                                                                                                          |
|-------------------------------|------------|-----------|------------------------------------------------------------------------------------------------------------------------------------------------------------------------------------------|
| <i>Begonia crystallina</i>    | Angiosperm | -         | Shui and Chen (106) reported this new species; it is only known from a limestone cave.                                                                                                   |
| <i>Pinelema tortutheca</i>    | Arachnid   | Dark zone | Based on Lin and Li (107), <i>Pinelema tortutheca</i> is only known from caves; it has typical troglotrophic characters, i.e., no eyes, pale somatic coloration, and no pigment pattern. |
| <i>Pinelema yunchuni</i>      | Arachnid   | -         | Based on Zhao et al. (108), <i>Pinelema yunchuni</i> is only known from caves.                                                                                                           |
| <i>Pinelema lizhuang</i>      | Arachnid   | -         | Based on Zhao et al. (108), <i>Pinelema lizhuang</i> is only known from caves.                                                                                                           |
| <i>Pinelema bifida</i>        | Arachnid   | Dark zone | Based on Lin and Li (107), <i>Pinelema bifida</i> only occurs in caves; it has typical troglotrophic characters, i.e., no eyes, pale somatic coloration, and no pigment pattern.         |
| <i>Pinelema huoyan</i>        | Arachnid   | Dark zone | Based on Zhao et al. (108), <i>Pinelema huoyan</i> lacks eyes and is only known from caves.                                                                                              |
| <i>Pinelema qingfengensis</i> | Arachnid   | Dark zone | Based on Zhao et al. (51), <i>Pinelema qingfengensis</i> , with reduced eyes, is only known from caves.                                                                                  |
| <i>Pinelema cordata</i>       | Arachnid   | -         | Based on Wang and Li (109), <i>Pinelema cordata</i> is only known from caves.                                                                                                            |
| <i>Pinelema wangshang</i>     | Arachnid   | -         | Based on Zhao et al. (108), <i>Pinelema wangshang</i> is only known from caves.                                                                                                          |
| <i>Pinelema cheni</i>         | Arachnid   | -         | Based on Zhao et al. (108), <i>Pinelema cheni</i> is only known from caves.                                                                                                              |
| <i>Pinelema wenyang</i>       | Arachnid   | -         | Based on Zhao et al. (108), <i>Pinelema wenyang</i> is only known from caves.                                                                                                            |
| <i>Pinelema strentarsi</i>    | Arachnid   | Dark zone | Based on Lin and Li (107), <i>Pinelema strentarsi</i> only occurs in caves; it has typical troglotrophic characters, i.e., no eyes, pale somatic coloration, and no pigment pattern.     |
| <i>Pinelema shiba</i>         | Arachnid   | Dark zone | Based on Zhao et al. (51), <i>Pinelema shiba</i> , with six vestigial eyes, is only known from caves.                                                                                    |
| <i>Pinelema xiushuiensis</i>  | Arachnid   | Dark zone | Based on Wang and Li (109), <i>Pinelema xiushuiensis</i> , which lacks eyes, is only known from caves.                                                                                   |
| <i>Pinelema spirae</i>        | Arachnid   | Dark zone | Based on Lin and Li (107), <i>Pinelema spirae</i> only occurs in caves; it has typical troglotrophic characters, i.e., no eyes, pale somatic coloration, and no pigment pattern.         |
| <i>Pinelema adunca</i>        | Arachnid   | -         | Based on Wang and Li (109), <i>Pinelema adunca</i> is only known from caves.                                                                                                             |
| <i>Pinelema renalis</i>       | Arachnid   | -         | Based on Zhao et al. (51), <i>Pinelema renalis</i> only occurs in caves.                                                                                                                 |
| <i>Pinelema biyunensis</i>    | Arachnid   | -         | Based on Wang and Li (109), <i>Pinelema biyunensis</i> is only known from caves.                                                                                                         |
| <i>Pinelema liangxi</i>       | Arachnid   | Dark zone | Based on Chen and Zhu (110), <i>Pinelema liangxi</i> lacks eyes and only occurs in caves.                                                                                                |
| <i>Pinelema bailongensis</i>  | Arachnid   | -         | Based on Zhao et al. (108), <i>Pinelema bailongensis</i> is only known from caves.                                                                                                       |
| <i>Pinelema zonaria</i>       | Arachnid   | -         | Based on Zhao et al. (51), <i>Pinelema zonaria</i> is only known from caves.                                                                                                             |
| <i>Pinelema podiensis</i>     | Arachnid   | Dark zone | Based on Zhao et al. (51), <i>Pinelema podiensis</i> has reduced eyes and only occurs in caves.                                                                                          |
| <i>Pinelema cunfengensis</i>  | Arachnid   | -         | Based on Song et al. (111), <i>Pinelema cunfengensis</i> is only known from caves.                                                                                                       |
| <i>Pinelema yashanensis</i>   | Arachnid   | -         | Based on Zhao et al. (51), <i>Pinelema yashanensis</i> is only known from caves.                                                                                                         |
| <i>Pinelema zhewang</i>       | Arachnid   | Dark zone | Based on Chen and Zhu (110), <i>Pinelema zhewang</i> , with no eyes, only occurs in complete darkness in the constant temperature zone of caves.                                         |

|                               |          |           |                                                                                                                                                                                           |
|-------------------------------|----------|-----------|-------------------------------------------------------------------------------------------------------------------------------------------------------------------------------------------|
| <i>Pinelema xiezi</i>         | Arachnid | -         | Based on Zhao et al. (51), <i>Pinelema xiezi</i> is only known from caves.                                                                                                                |
| <i>Pinelema nuocnutensis</i>  | Arachnid | Dark zone | Based on Zhao et al. (51), <i>Pinelema nuocnutensis</i> , with vestigial eyes, only occurs in caves.                                                                                      |
| <i>Pinelema zhenzhuang</i>    | Arachnid | Dark zone | Based on Zhao et al. (51), <i>Pinelema zhenzhuang</i> has no eyes and only occurs in caves.                                                                                               |
| <i>Pinelema breviseta</i>     | Arachnid | -         | Based on Tong and Li (112), <i>Pinelema breviseta</i> is only known from caves.                                                                                                           |
| <i>Pinelema dengi</i>         | Arachnid | -         | Based on Tong and Li (112), <i>Pinelema dengi</i> is only known from caves.                                                                                                               |
| <i>Pinelema pacchanensis</i>  | Arachnid | Dark zone | Based on Zhao et al. (51), <i>Pinelema pacchanensis</i> has no eyes and only occurs in caves.                                                                                             |
| <i>Pinelema daguaiwan</i>     | Arachnid | Dark zone | Based on Zhao et al. (51), <i>Pinelema daguaiwan</i> has no eyes and only occurs in caves.                                                                                                |
| <i>Pinelema conglobare</i>    | Arachnid | Dark zone | Based on Zhao et al. (51), <i>Pinelema conglobare</i> is only known from caves; it has typical troglotrophic characters, i.e., no eyes, pale somatic coloration, and no pigment pattern.  |
| <i>Pinelema dongbei</i>       | Arachnid | Dark zone | Based on Chen and Zhu (110), <i>Pinelema dongbei</i> has no eyes; it only occurs in complete darkness in the constant temperature zone of caves.                                          |
| <i>Pinelema oculata</i>       | Arachnid | -         | Based on Zhao et al. (51), <i>Pinelema oculata</i> is only known from caves.                                                                                                              |
| <i>Pinelema spinafemora</i>   | Arachnid | Dark zone | Based on Lin and Li (107), <i>Pinelema spinafemora</i> is only known from caves; it has typical troglotrophic characters, i.e., no eyes, pale somatic coloration, and no pigment pattern. |
| <i>Pinelema cucurbitina</i>   | Arachnid | -         | Based on Wang and Li (109), <i>Pinelema cucurbitina</i> is only known from caves.                                                                                                         |
| <i>Pinelema grandidens</i>    | Arachnid | Dark zone | Based on Zhao et al. (51), <i>Pinelema grandidens</i> , without eyes, only occurs in caves.                                                                                               |
| <i>Pinelema pedati</i>        | Arachnid | Dark zone | Based on Lin and Li (107), <i>Pinelema pedati</i> is only known from caves; it has typical troglotrophic characters, i.e., no eyes, pale somatic coloration, and no pigment pattern.      |
| <i>Pinelema exiloculata</i>   | Arachnid | Dark zone | Based on Zhao et al. (51), <i>Pinelema exiloculata</i> only occurs in caves; it has vestigial eyes.                                                                                       |
| <i>Pinelema laensis</i>       | Arachnid | -         | Based on Zhao et al. (51), <i>Pinelema laensis</i> is only known from caves.                                                                                                              |
| <i>Pinelema spirulata</i>     | Arachnid | -         | Based on Zhao et al. (51), <i>Pinelema spirulata</i> only occurs in caves.                                                                                                                |
| <i>Pinelema curcici</i>       | Arachnid | -         | Based on Wang and Li (109), <i>Pinelema curcici</i> is only known from caves.                                                                                                             |
| <i>Pinelema yaosaensis</i>    | Arachnid | -         | Based on Wang and Li (109), <i>Pinelema yaosaensis</i> only occurs in caves.                                                                                                              |
| <i>Pinelema mikrosphaira</i>  | Arachnid | -         | Based on Wang and Li (109), <i>Pinelema mikrosphaira</i> is only known from caves.                                                                                                        |
| <i>Pinelema vesiculata</i>    | Arachnid | Dark zone | Based on Lin and Li (107), <i>Pinelema vesiculata</i> is only known from caves; it has typical troglotrophic characters, i.e., no eyes, pale somatic coloration, and no pigment pattern.  |
| <i>Pinelema huobaensis</i>    | Arachnid | Dark zone | Based on Wang and Li (109), <i>Pinelema huobaensis</i> , which lacks eyes, only occurs in caves.                                                                                          |
| <i>Pinelema feilong</i>       | Arachnid | Dark zone | Based on Chen and Zhu (110), <i>Pinelema feilong</i> , which lacks eyes, only occurs in complete darkness in the constant temperature zone of caves.                                      |
| <i>Pinelema cucphongensis</i> | Arachnid | -         | Based on Zhao et al. (51), <i>Pinelema cucphongensis</i> is only known from caves.                                                                                                        |

|                                  |          |           |                                                                                                                                                                |
|----------------------------------|----------|-----------|----------------------------------------------------------------------------------------------------------------------------------------------------------------|
| <i>Pinelema tham</i>             | Arachnid | Dark zone | Based on Zhao et al. (51), <i>Pinelema tham</i> is only known from caves and has six vestigial eyes.                                                           |
| <i>Pinelema bella</i>            | Arachnid | -         | Based on Tong and Li (112), <i>Pinelema bella</i> only occurs in caves.                                                                                        |
| <i>Pinelema circularis</i>       | Arachnid | Dark zone | Based on Zhao et al. (51), <i>Pinelema circularis</i> only occurs in caves; it has no eyes.                                                                    |
| <i>Siamlema changhai</i>         | Arachnid | Dark zone | Based on Zhao et al. (51), <i>Siamlema changhai</i> is only known from caves; it has no eyes.                                                                  |
| <i>Siamlema suea</i>             | Arachnid | -         | Based on Zhao et al. (51), <i>Siamlema suea</i> only occurs in caves.                                                                                          |
| <i>Sundalema anguina</i>         | Arachnid | -         | Based on Zhao et al. (51), <i>Sundalema anguina</i> is only known from caves.                                                                                  |
| <i>Sundalema bonjol</i>          | Arachnid | Dark zone | Based on Zhao et al. (51), <i>Sundalema bonjol</i> is only known from caves; it has vestigial eyes.                                                            |
| <i>Sundalema khaorakkiat</i>     | Arachnid | Dark zone | Based on Zhao et al. (51), <i>Sundalema khaorakkiat</i> only occurs in caves; it has vestigial eyes.                                                           |
| <i>Mekonglema bailang</i>        | Arachnid | Dark zone | Based on Zhao et al. (51), <i>Mekonglema bailang</i> is only known from caves; it has four vestigial eyes.                                                     |
| <i>Mekonglema kaorao</i>         | Arachnid | Dark zone | Based on Zhao et al. (51), <i>Mekonglema kaorao</i> only occurs in caves; it has six vestigial eyes.                                                           |
| <i>Mekonglema yan</i>            | Arachnid | Dark zone | Based on Zhao et al. (51), <i>Mekonglema yan</i> is only known from caves; it has four vestigial eyes.                                                         |
| <i>Telema auricoma</i>           | Arachnid | -         | Based on Zhao et al. (51), <i>Telema auricoma</i> only occurs in caves.                                                                                        |
| <i>Telema guihua</i>             | Arachnid | Dark zone | Based on Zhao et al. (51), <i>Telema guihua</i> is only known from caves; it has no eyes and no pigment pattern.                                               |
| <i>Nesticella songi</i>          | Arachnid | -         | Based on Ballarin and Li (20), <i>Nesticella songi</i> is restricted to caves or cave-like microhabitats with high humidity and a stable temperature.          |
| <i>Nesticella baiseensis</i>     | Arachnid | -         | Based on Ballarin and Li (20), <i>Nesticella baiseensis</i> is restricted to caves or cave-like microhabitats with high humidity and a stable temperature.     |
| <i>Nesticella nandanensis</i>    | Arachnid | -         | Based on Ballarin and Li (20), <i>Nesticella nandanensis</i> is restricted to caves or cave-like microhabitats with high humidity and a stable temperature.    |
| <i>Nesticella yao</i>            | Arachnid | -         | Based on Ballarin and Li (20), <i>Nesticella yao</i> is restricted to caves or cave-like microhabitats with high humidity and a stable temperature.            |
| <i>Nesticella verticalis</i>     | Arachnid | -         | Based on Ballarin and Li (20), <i>Nesticella verticalis</i> is restricted to caves or cave-like microhabitats with high humidity and a stable temperature.     |
| <i>Nesticella chongqing</i>      | Arachnid | -         | Based on Ballarin and Li (20), <i>Nesticella chongqing</i> is restricted to caves or cave-like microhabitats with high humidity and a stable temperature.      |
| <i>Nesticella semicircularis</i> | Arachnid | -         | Based on Ballarin and Li (20), <i>Nesticella semicircularis</i> is restricted to caves or cave-like microhabitats with high humidity and a stable temperature. |
| <i>Nesticella gazuida</i>        | Arachnid | Dark zone | Based on Ballarin and Li (20), <i>Nesticella gazuida</i> is found exclusively in the deep part of caves.                                                       |

|                                    |          |           |                                                                                                                                                                     |
|------------------------------------|----------|-----------|---------------------------------------------------------------------------------------------------------------------------------------------------------------------|
| <i>Nesticella</i> sp. 293          | Arachnid | Dark zone | Based on Ballarin and Li (20), <i>Nesticella</i> sp. 293 is found exclusively in the deep part of caves.                                                            |
| <i>Nesticella caeca</i>            | Arachnid | Dark zone | Based on Ballarin and Li (20), <i>Nesticella caeca</i> is strongly bound to the subterranean habitat and found exclusively in the deep part of caves.               |
| <i>Nesticella sanchaheensis</i>    | Arachnid | -         | Based on Ballarin and Li (20), <i>Nesticella sanchaheensis</i> is restricted to caves or cave-like microhabitats with high humidity and a stable temperature.       |
| <i>Nesticella falcata</i>          | Arachnid | -         | Based on Ballarin and Li (20), <i>Nesticella falcata</i> is restricted to caves or cave-like microhabitats with high humidity and a stable temperature.             |
| <i>Nesticella liuzhaiensis</i>     | Arachnid | -         | Based on Ballarin and Li (20), <i>Nesticella liuzhaiensis</i> is restricted to caves or cave-like microhabitats with high humidity and a stable temperature.        |
| <i>Nesticella gracilentia</i>      | Arachnid | -         | Based on Ballarin and Li (20), <i>Nesticella gracilentia</i> is restricted to caves or cave-like microhabitats with high humidity and a stable temperature.         |
| <i>Nesticella shanlinensis</i>     | Arachnid | -         | Based on Ballarin and Li (20), <i>Nesticella shanlinensis</i> is restricted to caves or cave-like microhabitats with high humidity and a stable temperature.        |
| <i>Nesticella qiaoqiensis</i>      | Arachnid | -         | Based on Ballarin and Li (20), <i>Nesticella qiaoqiensis</i> is restricted to caves or cave-like microhabitats with high humidity and a stable temperature.         |
| <i>Nesticella xixia</i>            | Arachnid | -         | Based on Ballarin and Li (20), <i>Nesticella xixia</i> is found only in caves or cave-like microhabitats with high humidity and a stable temperature.               |
| <i>Nesticella huomachongensis</i>  | Arachnid | -         | Based on Ballarin and Li (20), <i>Nesticella huomachongensis</i> is found only in caves or cave-like microhabitats with high humidity and a stable temperature.     |
| <i>Nesticella fuliangensis</i>     | Arachnid | -         | Based on Ballarin and Li (20), <i>Nesticella fuliangensis</i> is found only in caves or cave-like microhabitats with high humidity and a stable temperature.        |
| <i>Nesticella wanzaiensis</i>      | Arachnid | -         | Based on Ballarin and Li (20), <i>Nesticella wanzaiensis</i> is found only in caves or cave-like microhabitats with high humidity and a stable temperature.         |
| <i>Nesticella yanbeiensis</i>      | Arachnid | -         | Based on Ballarin and Li (20), <i>Nesticella yanbeiensis</i> is found only in caves or cave-like microhabitats with high humidity and a stable temperature.         |
| <i>Nesticella apiculata</i>        | Arachnid | -         | Based on Ballarin and Li (20), <i>Nesticella apiculata</i> is found only in caves or cave-like microhabitats with high humidity and a stable temperature.           |
| <i>Nesticella quelpartensis</i>    | Arachnid | -         | Based on Ballarin and Li (20), <i>Nesticella quelpartensis</i> is found only in caves or cave-like microhabitats with high humidity and a stable temperature.       |
| <i>Troglocoelotes bailongensis</i> | Arachnid | Dark zone | Based on Li et al. (52), <i>Troglocoelotes bailongensis</i> is only known from the deep zone of moist and dark caves and has reduced eyes and pale body coloration. |
| <i>Troglocoelotes banmenensis</i>  | Arachnid | Dark zone | Based on Li et al. (52), <i>Troglocoelotes banmenensis</i> is only known from the deep zone of moist and dark caves and has reduced eyes and pale body coloration.  |
| <i>Troglocoelotes liangensis</i>   | Arachnid | Dark zone | Based on Li et al. (52), <i>Troglocoelotes liangensis</i> is only known from the deep zone of moist and dark caves and has reduced eyes and pale body coloration.   |
| <i>Troglocoelotes nongchiensis</i> | Arachnid | Dark zone | Based on Li et al. (52), <i>Troglocoelotes nongchiensis</i> only occurs in the deep zone of moist and dark caves and has reduced eyes and pale body coloration.     |

|                                        |           |                                 |                                                                                                                                                                    |
|----------------------------------------|-----------|---------------------------------|--------------------------------------------------------------------------------------------------------------------------------------------------------------------|
| <i>Troglocoelotes qixianensis</i>      | Arachnid  | Dark zone                       | Based on Li et al. (52), <i>Troglocoelotes qixianensis</i> is only known from the deep zone of moist and dark caves and has reduced eyes and pale body coloration. |
| <i>Troglocoelotes tortus</i>           | Arachnid  | Dark zone                       | Based on Li et al. (52), <i>Troglocoelotes tortus</i> is only known from the deep zone of moist and dark caves and has reduced eyes and pale body coloration.      |
| <i>Troglocoelotes yumiganensis</i>     | Arachnid  | Dark zone                       | Based on Li et al. (52), <i>Troglocoelotes yumiganensis</i> only occurs in the deep zone of moist and dark caves and has reduced eyes and pale body coloration.    |
| <i>Notiocoelotes maoganensis</i>       | Arachnid  | -                               | Based on Zhang et al. (53), <i>Notiocoelotes maoganensis</i> only occurs in caves.                                                                                 |
| <i>Notiocoelotes palinitropus</i>      | Arachnid  | -                               | Based on Wang et al. (113), <i>Notiocoelotes palinitropus</i> is only known from caves.                                                                            |
| <i>Protobothrops maolanensis</i>       | Reptile   | Entrance & twilight & dark zone | Based on Yang et al. (114), <i>Protobothrops maolanensis</i> is only known from caves.                                                                             |
| <i>Elaphe moellendorffi</i>            | Reptile   | Entrance & twilight & dark zone | Based on Zhao et al. (115), <i>Elaphe moellendorffi</i> is only known from caves.                                                                                  |
| <i>Odorrana lipuensis</i>              | Amphibian | Dark zone                       | Based on Mo et al. (116), <i>Odorrana lipuensis</i> only occurs in caves.                                                                                          |
| <i>Odorrana wuchuanensis</i>           | Amphibian | Dark zone                       | Based on Mo et al. (116), <i>Odorrana wuchuanensis</i> only occurs in dark caves.                                                                                  |
| <i>Bibarba parvoculu</i>               | Fish      | Dark zone                       | Based on Wu et al. (117), <i>Bibarba parvoculu</i> is only known from caves; it has reduced eyes and a white and semitransparent body.                             |
| <i>Oreonectes jiarongensis</i>         | Fish      | Dark zone                       | Based on Liu et al. (118), <i>Oreonectes jiarongensis</i> was inferred as endemic to caves; it lacks eyes and pigment throughout its body.                         |
| <i>Oreonectes daqikongensis</i>        | Fish      | Dark zone                       | Based on Deng et al. (119), <i>Oreonectes daqikongensis</i> only occurs in caves; it has completely degraded eyes and a white and transparent body.                |
| <i>Oreonectes furcocaudalis</i>        | Fish      | Dark zone                       | Based on Romero et al. (120), <i>Oreonectes furcocaudalis</i> only occurs in caves.                                                                                |
| <i>Oreonectes shuilongensis</i>        | Fish      | -                               | Based on Deng et al. (121), <i>Oreonectes shuilongensis</i> is only known from caves.                                                                              |
| <i>Triplophysa fengshanensis</i>       | Fish      | Dark zone                       | Based on Lan et al. (122), <i>Triplophysa fengshanensis</i> is only known from caves; it has completely degraded eyes and a white body.                            |
| <i>Triplophysa tianeensis</i>          | Fish      | Dark zone                       | Based on Romero et al. (120), <i>Triplophysa tianeensis</i> was inferred to be a troglobite based on morphological characters and field observations.              |
| <i>Triplophysa xiangxiensis</i>        | Fish      | Dark zone                       | Based on Romero et al. (120), <i>Triplophysa xiangxiensis</i> was inferred to be a troglobite based on morphological characters and field observations.            |
| <i>Triplophysa rosa</i>                | Fish      | Dark zone                       | Based on Romero et al. (120), <i>Triplophysa rosa</i> was inferred to be a troglobite based on morphological characters and field observations.                    |
| <i>Sinocyclocheilus anophthalmus</i>   | Fish      | Dark zone                       | Based on Romero et al. (120), <i>Sinocyclocheilus anophthalmus</i> was inferred to be a troglobite based on morphological characters and field observations.       |
| <i>Sinocyclocheilus multipunctatus</i> | Fish      | Dark zone                       | Based on Romero et al. (120), <i>Sinocyclocheilus multipunctatus</i> was inferred to be a troglobite based on morphological characters and field observations.     |

|                                          |       |           |                                                                                                                                                                 |
|------------------------------------------|-------|-----------|-----------------------------------------------------------------------------------------------------------------------------------------------------------------|
| <i>Sinocyclocheilus cyphotergous</i>     | Fish  | Dark zone | Based on Romero et al. (120), <i>Sinocyclocheilus cyphotergous</i> was inferred to be a troglobite based on morphological characters and field observations.    |
| <i>Sinocyclocheilus hugeibarbus</i>      | Fish  | Dark zone | Based on Romero et al. (120), <i>Sinocyclocheilus hugeibarbus</i> was inferred to be a troglobite based on morphological characters and field observations.     |
| <i>Sinocyclocheilus lingyunensis</i>     | Fish  | Dark zone | Based on Romero et al. (120), <i>Sinocyclocheilus lingyunensis</i> was inferred to be a troglobite based on morphological characters and field observations.    |
| <i>Sinocyclocheilus longibarbatulus</i>  | Fish  | Dark zone | Based on Romero et al. (120), <i>Sinocyclocheilus longibarbatulus</i> was inferred to be a troglobite based on morphological characters and field observations. |
| <i>Sinocyclocheilus yishanensis</i>      | Fish  | Dark zone | Based on Romero et al. (120), <i>Sinocyclocheilus yishanensis</i> was inferred to be a troglobite based on morphological characters and field observations.     |
| <i>Sinocyclocheilus ronganensis</i>      | Fish  | Dark zone | Based on Luo et al. (123), <i>Sinocyclocheilus ronganensis</i> is only known from an underground river flowing through caves.                                   |
| <i>Sinocyclocheilus microphthalmus</i>   | Fish  | Dark zone | Based on Romero et al. (120), <i>Sinocyclocheilus microphthalmus</i> was inferred to be a troglobite based on morphological characters and field observations.  |
| <i>Sinocyclocheilus anshuiensis</i>      | Fish  | Dark zone | Based on Gan et al. (124), <i>Sinocyclocheilus anshuiensis</i> was inferred as endemic to caves and has characteristics such as completely degraded eyes.       |
| <i>Sinocyclocheilus angularis</i>        | Fish  | Dark zone | Based on Romero et al. (120), <i>Sinocyclocheilus angularis</i> was inferred to be a troglobite based on morphological characters and field observations.       |
| <i>Sinocyclocheilus bicornutus</i>       | Fish  | Dark zone | Based on Romero et al. (120), <i>Sinocyclocheilus bicornutus</i> was inferred to be a troglobite based on morphological characters and field observations.      |
| <i>Sinocyclocheilus altishoulderus</i>   | Fish  | Dark zone | Based on Romero et al. (120), <i>Sinocyclocheilus altishoulderus</i> was inferred to be a troglobite based on morphological characters and field observations.  |
| <i>Sinocyclocheilus rhinoceros</i>       | Fish  | Dark zone | Based on Romero et al. (120), <i>Sinocyclocheilus rhinoceros</i> was inferred to be a troglobite based on morphological characters and field observations.      |
| <i>Sinocyclocheilus furcodorsalis</i>    | Fish  | Dark zone | Based on Romero et al. (120), <i>Sinocyclocheilus furcodorsalis</i> was inferred to be a troglobite based on morphological characters and field observations.   |
| <i>Wardomycopsis dolichi</i>             | Fungi | -         | Based on Zhang et al. (59), <i>Wardomycopsis dolichi</i> is only known from the E'gu cave.                                                                      |
| <i>Wardomycopsis ellipsoconidiophora</i> | Fungi | -         | Based on Zhang et al. (59), <i>Wardomycopsis ellipsoconidiophora</i> is only known from the Sanshan cave.                                                       |
| <i>Wardomycopsis fusca</i>               | Fungi | -         | Based on Zhang et al. (59), <i>Wardomycopsis fusca</i> only occurs in the Luotian cave.                                                                         |
| <i>Wardomycopsis longicatenata</i>       | Fungi | -         | Based on Zhang et al. (59), <i>Wardomycopsis longicatenata</i> only occurs in a karst cave.                                                                     |
| <i>Microascus collaris</i>               | Fungi | -         | Based on Zhang et al. (59), <i>Microascus collaris</i> is only known from the Sanshan cave.                                                                     |
| <i>Microascus superficialis</i>          | Fungi | -         | Based on Zhang et al. (59), <i>Microascus superficialis</i> is only known from the Sanshan cave.                                                                |
| <i>Microascus anfractus</i>              | Fungi | -         | Based on Zhang et al. (125), <i>Microascus anfractus</i> only occurs in a karst cave.                                                                           |
| <i>Microascus globulosus</i>             | Fungi | -         | Based on Zhang et al. (125), <i>Microascus globulosus</i> only occurs in a karst cave.                                                                          |



|                                    |       |   |                                                                                                     |
|------------------------------------|-------|---|-----------------------------------------------------------------------------------------------------|
| <i>Microascus levis</i>            | Fungi | - | Based on Zhang et al. (59), <i>Microascus levis</i> is only known from the Luotian cave.            |
| <i>Microascus sparsimycelialis</i> | Fungi | - | Based on Zhang et al. (59), <i>Microascus sparsimycelialis</i> is only known from the Sanshan cave. |
| <i>Microascus trigonus</i>         | Fungi | - | Based on Zhang et al. (59), <i>Microascus trigonus</i> only occurs in caves.                        |
| <i>Gamszarea humicola</i>          | Fungi | - | Based on Zhang et al. (59), <i>Gamszarea humicola</i> is only known from the E'gu cave.             |
| <i>Gamszarea lunata</i>            | Fungi | - | Based on Zhang et al. (59), <i>Gamszarea lunata</i> only occurs in the E'gu cave.                   |
| <i>Gamszarea microspora</i>        | Fungi | - | Based on Zhang et al. (59), <i>Gamszarea microspora</i> is only known from the Tianliang cave.      |
| <i>Simplicillium album</i>         | Fungi | - | Based on Zhang et al. (59), <i>Simplicillium album</i> only occurs in the Sanshan cave.             |
| <i>Simplicillium calcicola</i>     | Fungi | - | Based on Zhang et al. (125), <i>Simplicillium calcicola</i> only occurs in a karst cave.            |
| <i>Simplicillium humicola</i>      | Fungi | - | Based on Zhang et al. (59), <i>Simplicillium humicola</i> is only known from the E'gu cave.         |
| <i>Paracremonium apiculatum</i>    | Fungi | - | Based on Zhang et al. (59), <i>Paracremonium apiculatum</i> is only known from the Sanjiao cave.    |
| <i>Paracremonium ellipsoideum</i>  | Fungi | - | Based on Zhang et al. (59), <i>Paracremonium ellipsoideum</i> only occurs in the Sanjiao cave.      |
| <i>Paracremonium variiforme</i>    | Fungi | - | Based on Zhang et al. (125), <i>Paracremonium variiforme</i> is only known from a karst cave.       |

395 **Table S4. Inferred stem-node age, ancestral vegetation type and source area of 75**396 **lineages/species endemic to subtropical East Asian caves**

| Endemic cave lineages/species                                                                 | Stem-node age (Ma) |                          |       | Ancestral<br>vegetation type | Source area |
|-----------------------------------------------------------------------------------------------|--------------------|--------------------------|-------|------------------------------|-------------|
|                                                                                               | Median             | 95% credibility interval |       |                              |             |
|                                                                                               |                    | Lower                    | Upper |                              |             |
| <i>Polystichum kungianum</i>                                                                  | 1.67               | 0.53                     | 3.24  | Forest                       | East Asia   |
| <i>Polystichum speluncicola-</i><br><i>Polystichum cavernicola</i>                            | 4.69               | 1.03                     | 8.31  | Forest                       | East Asia   |
| <i>Hymenasplenium hastifolium</i>                                                             | 3.09               | 0.04                     | 9.71  | Forest                       | East Asia   |
| <i>Hymenasplenium wangpeishanii</i>                                                           | 11.11              | 2.01                     | 23.03 | Forest                       | East Asia   |
| <i>Lysimachia fanii</i>                                                                       | 11.5               | 8.05                     | 15.46 | Forest                       | East Asia   |
| <i>Mitreola pingtaoi</i>                                                                      | 0.81               | 0.3                      | 1.41  | Forest                       | East Asia   |
| <i>Primulina argentea</i>                                                                     | 7.24               | 6.21                     | 8.26  | Forest                       | East Asia   |
| <i>Primulina debaoensis-Primulina</i><br><i>rongshuiensis</i> clade                           | 3.82               | 3.2                      | 4.51  | Forest                       | East Asia   |
| <i>Primulina fengshanensis</i>                                                                | 5.34               | 4.03                     | 6.17  | Forest                       | East Asia   |
| <i>Primulina flavimaculata</i>                                                                | 3.25               | 2.39                     | 4.29  | Forest                       | East Asia   |
| <i>Primulina hezhouensis</i>                                                                  | 6.99               | 6.12                     | 7.76  | Forest                       | East Asia   |
| <i>Primulina huaijiensis</i>                                                                  | 9.05               | 7.71                     | 10.01 | Forest                       | East Asia   |
| <i>Primulina jingxiensis</i>                                                                  | 2.85               | 2.31                     | 3.51  | Forest                       | East Asia   |
| <i>Primulina latinervis</i>                                                                   | 4.83               | 3.88                     | 5.52  | Forest                       | East Asia   |
| <i>Primulina leei</i>                                                                         | 3.47               | 2.89                     | 4.86  | Forest                       | East Asia   |
| <i>Primulina leprosa</i>                                                                      | 6.88               | 5.97                     | 7.46  | Forest                       | East Asia   |
| <i>Primulina linglingensis</i> var.<br><i>fragrans-Primulina</i><br><i>chizhouensis</i> clade | 3.28               | 2.73                     | 3.83  | Forest                       | East Asia   |
| <i>Primulina longicalyx</i>                                                                   | 2.76               | 2.04                     | 3.34  | Forest                       | East Asia   |
| <i>Primulina luzhaiensis</i>                                                                  | 2.26               | 1.81                     | 2.73  | Forest                       | East Asia   |
| <i>Primulina mabaensis</i>                                                                    | 6.81               | 5.8                      | 7.66  | Forest                       | East Asia   |
| <i>Primulina ningmingensis</i>                                                                | 1.99               | 1.06                     | 4.04  | Forest                       | East Asia   |
| <i>Primulina pseudomollifolia</i>                                                             | 5.86               | 4.46                     | 6.67  | Forest                       | East Asia   |
| <i>Primulina pseudorosealba</i>                                                               | 4.33               | 3.66                     | 5.11  | Forest                       | East Asia   |
| <i>Primulina qingyuanensis</i>                                                                | 1.97               | 1.61                     | 2.48  | Forest                       | East Asia   |
| <i>Primulina renifolia</i>                                                                    | 9.09               | 7.73                     | 10.04 | Forest                       | East Asia   |
| <i>Primulina subulata-Primulina</i><br><i>subulata</i> var. <i>yangchunensis</i><br>clade     | 5.24               | 4.45                     | 6.12  | Forest                       | East Asia   |
| <i>Primulina yingdeensis</i>                                                                  | 2.85               | 2.32                     | 3.57  | Forest                       | East Asia   |
| <i>Primulina zhoui</i>                                                                        | 2.34               | 1.03                     | 4.03  | Forest                       | East Asia   |
| <i>Petrocodon retroflexus</i>                                                                 | 9.82               | 4.76                     | 14.88 | Forest                       | East Asia   |
| <i>Petrocodon tiandengensis</i>                                                               | 9.87               | 3.13                     | 15    | Forest                       | East Asia   |
| <i>Petrocosmea xanthomaculata</i>                                                             | 1.16               | 0.3                      | 2.21  | Forest                       | East Asia   |
| <i>Hemiboea suiyangensis</i>                                                                  | 3.09               | 1.53                     | 4.67  | Forest                       | East Asia   |
| <i>Lysionotus fengshanensis</i>                                                               | 3.15               | 1.26                     | 5.53  | Forest                       | East Asia   |
| <i>Paraboea velutina</i>                                                                      | 2.43               | 1.02                     | 4.16  | Forest                       | East Asia   |

|                                                                                         |        |       |        |         |           |
|-----------------------------------------------------------------------------------------|--------|-------|--------|---------|-----------|
| <i>Elatostema albopilosoides</i>                                                        | 7.02   | 1.34  | 12.92  | Forest  | East Asia |
| <i>Elatostema densistriolatum</i>                                                       | 24.1   | 16.4  | 31.92  | Forest  | East Asia |
| <i>Elatostema gyrocephalum</i>                                                          | 1.02   | 0.01  | 3.71   | Forest  | East Asia |
| <i>Elatostema hezhouense</i>                                                            | 2.12   | 0.15  | 5.04   | Forest  | East Asia |
| <i>Elatostema tenuinerve-</i><br><i>Elatostema binatum</i>                              | 12.38  | 3.72  | 21.15  | Forest  | East Asia |
| <i>Begonia bamaensis</i>                                                                | 1.03   | 0     | 3.02   | Forest  | East Asia |
| <i>Begonia crystallina</i>                                                              | 2.8    | 0     | 7.23   | Forest  | East Asia |
| <i>Mekonglema bailang</i>                                                               | 8.86   | 3.18  | 15.69  | Forest  | East Asia |
| <i>Pinelema tortutheca-Pinelema</i><br><i>bella</i> clade                               | 106.35 | 84.37 | 134.46 | Forest  | East Asia |
| <i>Siamlema changhai-</i><br><i>Mekonglema yan</i> clade                                | 93.99  | 68.25 | 120.11 | Forest  | East Asia |
| <i>Telema auricoma</i>                                                                  | 18.41  | 8.33  | 28.78  | Forest  | East Asia |
| <i>Telema guihua</i>                                                                    | 8.46   | 2.94  | 14.23  | Forest  | East Asia |
| <i>Nesticella gracilentia-Nesticella</i><br><i>xixia</i> clade                          | 22.58  | 13.87 | 32.02  | Forest  | East Asia |
| <i>Nesticella huomachongensis-</i><br><i>Nesticella apiculata</i> clade                 | 14.4   | 5.84  | 22.39  | Forest  | East Asia |
| <i>Nesticella liuzhaiensis-</i><br><i>Nesticella falcata</i> clade                      | 8.86   | 1.9   | 17.3   | Forest  | East Asia |
| <i>Nesticella quelpartensis</i>                                                         | 11.41  | 0.76  | 29.29  | Forest  | East Asia |
| <i>Nesticella songi-Nesticella</i><br><i>sanchaheensis</i> clade                        | 15.19  | 6.81  | 21.65  | Forest  | East Asia |
| <i>Troglucoelotes bailongensis-</i><br><i>Troglucoelotes liangensis</i> clade           | 48.94  | 41.8  | 55.98  | Forest  | East Asia |
| <i>Notiocoelotes palinitropus-</i><br><i>Notiocoelotes maoganensis</i><br>clade         | 31.96  | 25.21 | 39.57  | Forest  | East Asia |
| <i>Protobothrops maolanensis</i>                                                        | 4.33   | 2.71  | 6.27   | Forest  | East Asia |
| <i>Elaphe moellendorffi</i>                                                             | 17.7   | 10.64 | 24.88  | Forest  | East Asia |
| <i>Odorrana lipuensis</i>                                                               | 16.68  | 11.59 | 21.84  | Forest  | East Asia |
| <i>Odorrana wuchuanensis</i>                                                            | 8.53   | 3.14  | 15.3   | Forest  | East Asia |
| <i>Bibarba parvoculu</i>                                                                | 22.85  | 14.56 | 29.78  | Unknown | East Asia |
| <i>Oreonectes jiarongensis-</i><br><i>Oreonectes shuilongensis</i> clade                | 19.95  | 14.63 | 25.59  | Unknown | East Asia |
| <i>Triplophysa tianeensis-</i><br><i>Triplophysa rosa</i> clade                         | 13.84  | 8.92  | 18.66  | Unknown | East Asia |
| <i>Sinocyclocheilus furcodorsalis-</i><br><i>Sinocyclocheilus cyphotergous</i><br>clade | 31.82  | 28.17 | 36.36  | Unknown | East Asia |
| <i>Wardomycopsis dolichi-</i><br><i>Wardomycopsis longicatenata</i><br>clade            | 27.84  | 27.3  | 28     | Unknown | East Asia |
| <i>Wardomycopsis</i><br><i>ellipsoconidiophora-</i><br><i>Wardomycopsis fusca</i> clade | 18.69  | 14.79 | 21.71  | Unknown | East Asia |
| <i>Microascus anfractus</i>                                                             | 23.24  | 19.82 | 25.84  | Unknown | East Asia |
| <i>Microascus collaris</i>                                                              | 6.37   | 4.58  | 8.18   | Unknown | East Asia |
| <i>Microascus globulosus</i>                                                            | 19.76  | 16.28 | 22.05  | Unknown | East Asia |
| <i>Microascus levis</i>                                                                 | 10.95  | 8.51  | 12.67  | Unknown | East Asia |

|                                                                                |        |       |        |         |                  |
|--------------------------------------------------------------------------------|--------|-------|--------|---------|------------------|
| <i>Microascus sparsimycelialis</i>                                             | 18.25  | 14.4  | 20.94  | Unknown | East Asia        |
| <i>Microascus superficialis</i>                                                | 9.09   | 6.41  | 12.96  | Unknown | North<br>America |
| <i>Microascus trigonus</i>                                                     | 10.39  | 5.71  | 14.69  | Unknown | East Asia        |
| <i>Gamszarea microspora-</i><br><i>Gamszarea lunata</i> clade                  | 100.08 | 95.35 | 103.45 | Unknown | East Asia        |
| <i>Simplicillium album</i>                                                     | 39.36  | 32.43 | 44.83  | Unknown | East Asia        |
| <i>Simplicillium calcicola</i>                                                 | 8.66   | 5.74  | 11.37  | Unknown | East Asia        |
| <i>Simplicillium humicola</i>                                                  | 13.77  | 11.03 | 16.44  | Unknown | East Asia        |
| <i>Paracremonium variiforme-</i><br><i>Paracremonium ellipsoideum</i><br>clade | 55.59  | 50.73 | 58.66  | Unknown | East Asia        |

---

397 Note: Inferred events and ancestral states were summarized based on the result of historical  
398 habitat, range, and vegetation reconstruction analyses.

399 **Table S5. Summary of paleoaltimetry estimates for the Tibet-Himalaya-Hengduan region**  
 400 **(THH) and the Yunnan-Guizhou Plateau (YGP)**

| Region | Locality                | Age (Ma)  | Paleoelevation (m) | Modern elevation (m) | Method                      | Reference |
|--------|-------------------------|-----------|--------------------|----------------------|-----------------------------|-----------|
| THH    | Kailas*                 | 26-21     | 2700-3200          | 5103                 | Geochemistry, geochronology | (126)     |
| THH    | Mount Everest*          | 17-16     | 5100-5400          | 8800                 | Isotope                     | (127)     |
| THH    | Heihuling*              | 51-28     | 4562-5759          | 5200                 | Isotope                     | (128)     |
| THH    | Nima*                   | 26-23.5   | 1000-1000          | 4600                 | Fossil                      | (129)     |
| THH    | Qiabulin*               | 21-19     | 1400-3200          | 4020                 | Fossil                      | (130)     |
| THH    | Lunpola*                | 30-25     | 2300               | 4700                 | Fossil                      | (131)     |
| THH    | Markam*                 | 34.7-33.4 | 3590-3900          | 3910                 | Fossil                      | (132)     |
| YGP    | Liming*                 | 56-33.9   | 2350-2950          | 2700                 | Isotope                     | (133)     |
| YGP    | Western Yunnan Plateau* | 19.6-16.2 | 560                | 2300                 | Sediment                    | (134)     |
| THH    | Zanda                   | 5.3-2.6   | 3536-4176          | 3990                 | Fossil                      | (135)     |
| THH    | Namling                 | 15        | 5540-5540          | 4450                 | Fossil                      | (136)     |
| THH    | Thakkhola               | 11-10.5   | 3800-5900          | 3000-4200            | Isotope                     | (137)     |
| THH    | Gyirong                 | 7         | 1307-3153          | 4200                 | Isotope                     | (138)     |
| YGP    | Eryuan                  | 5.3-2.6   | 2050-3450          | 2300                 | Isotope                     | (133)     |
| YGP    | Lanping                 | 11.6-5.3  | 2600-3750          | 2700                 | Isotope                     | (133)     |
| YGP    | Lincang                 | 11.6-5.3  | 214                | 1600                 | Fossils                     | (139)     |
| YGP    | Luhe                    | 11.6-5.3  | 200-1800           | 1900                 | Isotope                     | (133)     |
| YGP    | Western Yunnan Plateau  | 16.2-11   | 860-950            | 2300                 | Sediment                    | (134)     |
| YGP    | Western Yunnan Plateau  | 11-5.3    | 800                | 2300                 | Sediment                    | (134)     |
| YGP    | Western Yunnan Plateau  | 5.3-1.6   | 2600-2725          | 2300                 | Sediment                    | (134)     |
| YGP    | Xianfeng                | 11.6-5.3  | 1936               | 2200                 | Fossil                      | (139)     |
| YGP    | Xiaolongtan             | 11.6-5.3  | 530                | 1050                 | Fossil                      | (139)     |
| YGP    | Yanyuan                 | 5.3-1     | 1300-3500          | 2300                 | Isotope                     | (133)     |

401 Note: \* Localities that contributed to the estimate of paleoelevations of the THH and YGP region  
 402 in the Oligocene-Early Miocene.

403 **Table S6. The climate parameters of nineteen fossil sites in subtropical China**

| No. | Site                | Location (°N, °E) | Dating method                      | Fossil type | MTCM (°C)     |             |              |         | MAP (mm)      |             |              |         | Reference |
|-----|---------------------|-------------------|------------------------------------|-------------|---------------|-------------|--------------|---------|---------------|-------------|--------------|---------|-----------|
|     |                     |                   |                                    |             | Early Miocene | Mid-Miocene | Late Miocene | Present | Early Miocene | Mid-Miocene | Late Miocene | Present |           |
| 1   | Fuyang, Anhui       | 33°21', 115°28'   | Biostratigraphy                    | Pollen      | -1.2          |             |              | -3.3    | 1191          |             |              | 835     | (140,141) |
| 2   | Tianchang, Anhui    | 32°31', 119°04'   | Biostratigraphy                    | Pollen      | 3.6           | 2.1         |              | -1.2    | 1248          | 1248        |              | 1001    | (141–143) |
| 3   | Mindongnan, Fujian  | 24°14', 117°54'   | Biostratigraphy                    | Pollen      |               | 10          | 10           | 9.0     |               | 1369        | 1369         | 1256    | (141,144) |
| 4   | Duan, Guangxi       | 23°58', 107°49'   | Biostratigraphy                    | Pollen      | 3.6           | 3.6         |              | 8.5     | 1263          | 1263        |              | 1531    | (141,145) |
| 5   | Huanghua, Hebei     | 38°22', 117°21'   | Biostratigraphy                    | Pollen      |               |             | 3.6          | -8.6    |               |             | 1012         | 530     | (141,146) |
| 6   | Sihong, Jiangsu     | 33°30', 118°24'   | Biostratigraphy                    | Pollen      | 2.1           |             |              | -2.7    | 1193          |             |              | 789     | (141,147) |
| 7   | Yancheng, Jiangsu   | 33°22', 120°07'   | Biostratigraphy                    | Pollen      | 3.6           | 3.6         | 3.6          | -2.2    | 1103          | 1103        | 1103         | 978     | (141,148) |
| 8   | Guangchang, Jiangxi | 27°13', 116°19'   | Biostratigraphy                    | Pollen      | 3.6           | 3.6         |              | 1.5     | 1371          | 1217        |              | 1758    | (141,149) |
| 9   | Liaocheng, Shandong | 36°27', 115°58'   | Biostratigraphy                    | Pollen      |               | 3.6         |              | -7.0    |               | 1014        |              | 547     | (141,150) |
| 10  | Shanwang, Shandong  | 36°33', 118°44'   | Biostratigraphy                    | Pollen      |               | 3.6         |              | -8.5    |               | 1248        |              | 758     | (141,151) |
| 11  | Jiyang, Shandong    | 36°58', 117°12'   | Biostratigraphy                    | Pollen      | -3.1          | -3.1        | -3.1         | -7.0    | 1156          | 1156        | 1152         | 713     | (141,152) |
| 12  | Lantian, Shanxi     | 34°11', 109°15'   | Biostratigraphy,<br>paleomagnetism | Pollen      | 2.1           | 2.1         |              | -5.4    | 1109          | 1109        |              | 643     | (141,153) |
| 13  | Songpan, Sichuan    | 32°38', 103°36'   | Biostratigraphy                    | Pollen      |               | -3.1        | -3.1         | -13.3   |               | 1143        | 1143         | 745     | (141,154) |
| 14  | Kaiyuan, Yunnan     | 23°48', 103°12'   | Biostratigraphy                    | Pollen      |               |             | 0.6          | 3.1     |               |             | 1427         | 1215    | (141,155) |
| 15  | Xianfeng, Yunnan    | 25°25', 102°51'   | Biostratigraphy                    | Leaf        |               |             | 2.7          | 0.8     |               |             | 1368         | 887     | (141,156) |
| 16  | Xiaolongtan, Yunnan | 23°30', 103°18'   | Biostratigraphy,<br>paleomagnetism | Leaf        |               |             | 9.1          | 2.9     |               |             | 1464         | 1336    | (141,157) |
| 17  | Ninghai, Zhejiang   | 29°18', 121°25'   | Biostratigraphy                    | Pollen      |               | -3.1        |              | -0.2    |               | 1576        |              | 1433    | (141,158) |
| 18  | Xianju, Zhejiang    | 28°51', 120°44'   | Biostratigraphy                    | Pollen      |               | 2.1         |              | -0.2    |               | 1087        |              | 1648    | (141,158) |
| 19  | Tiantai, Zhejiang   | 29°36', 120°49'   | Biostratigraphy                    | Pollen      | 2.1           | 2.1         |              | -0.4    | 1193          | 1193        |              | 1447    | (141,159) |

404 Note: Minimum temperature of the coldest month (MTCM) and mean annual precipitation (MAP) are presented. The present values of these nineteen sites are calculated from WorldClim2 (160) at 30' resolution.

405 **Table S7. Species and GenBank accession numbers used in this study**406 ***Polystichum* (Dryopteridaceae)**

| Species                           | <i>rbcL</i> | <i>psbA-trnH</i> | <i>rps4-trnS</i> | <i>trnL-F</i> |
|-----------------------------------|-------------|------------------|------------------|---------------|
| <i>Polystichum acanthophyllum</i> | KU244712    | KU244785         | KU662030         | KU662019      |
| <i>Polystichum acrostichoides</i> | MG215050    | KP402515         | MK214694         | -             |
| <i>Polystichum aculeatum</i>      | KX768041    | -                | KX768072         | KX768064      |
| <i>Polystichum acutidens</i>      | KT831872    | -                | -                | -             |
| <i>Polystichum acutipinnulum</i>  | KU244732    | -                | KU244900         | KU244987      |
| <i>Polystichum alcicorne</i>      | KU244723    | KU244796         | KU244883         | KU244970      |
| <i>Polystichum alfarii</i>        | AF537236    | -                | -                | EF177271      |
| <i>Polystichum altum</i>          | MK174897    | -                | -                | -             |
| <i>Polystichum ammifolium</i>     | KU244753    | KU244839         | KU244926         | KU245013      |
| <i>Polystichum andersonii</i>     | KX768033    | JN189401         | KX768074         | JX476098      |
| <i>Polystichum andinum</i>        | MK174898    | -                | MK214696         | MK035852      |
| <i>Polystichum atkinsonii</i>     | -           | KU244770         | KU244860         | KU244945      |
| <i>Polystichum attenuatum</i>     | KU244725    | KU244801         | KU244888         | KU244975      |
| <i>Polystichum auriculum</i>      | KU244758    | KU244844         | KU244931         | KU245020      |
| <i>Polystichum bakerianum</i>     | -           | KU244806         | KU244893         | KU244980      |
| <i>Polystichum balansae</i>       | KT831873    | -                | -                | -             |
| <i>Polystichum biaristatum</i>    | -           | KU244802         | KU244889         | KU244976      |
| <i>Polystichum bifidum</i>        | KU244757    | KU244843         | KU244930         | KU245019      |
| <i>Polystichum bonseyi</i>        | EF177341    | -                | KX768075         | KX768063      |
| <i>Polystichum braunii</i>        | KX768035    | KX068888         | KX768077         | KX768061      |
| <i>Polystichum californicum</i>   | MK776793    | KU244830         | KU244918         | MK776826      |
| <i>Polystichum capillipes</i>     | -           | KU662003         | KU662028         | KU662017      |
| <i>Polystichum caruifolium</i>    | KU244724    | KU244797         | KU244884         | KU244971      |
| <i>Polystichum castaneum</i>      | KU244730    | KU244811         | KU244898         | KU244985      |
| <i>Polystichum caudescens</i>     | MK174899    | -                | MK214697         | MK035862      |
| <i>Polystichum chilense</i>       | MK174900    | -                | MK214698         | MK035855      |
| <i>Polystichum chingiae</i>       | KU244720    | KU244793         | KU244880         | KU244967      |
| <i>Polystichum christii</i>       | AY545486    | -                | DQ151862         | DQ150399      |
| <i>Polystichum chunii</i>         | -           | KU244781         | KU244870         | KU244955      |
| <i>Polystichum concinnum</i>      | MK174901    | -                | MK214700         | MK035861      |
| <i>Polystichum craspedosorum</i>  | AB575189    | KY014815         | KU244935         | KU245024      |
| <i>Polystichum crinigerum</i>     | KU244722    | KU244795         | KU244882         | KU244969      |
| <i>Polystichum cyclolobum</i>     | MH159212    | KU244767         | KU244857         | MH101449      |
| <i>Polystichum cystostegia</i>    | AF208392    | -                | AY164630         | -             |
| <i>Polystichum deltodon</i>       | KU244703    | KU244803         | KU244862         | KU244977      |
| <i>Polystichum dielsii</i>        | KU244709    | KU244782         | KU244871         | KU244956      |
| <i>Polystichum discretum</i>      | KX768056    | KU244780         | -                | KU244954      |

|                                                         |          |          |          |           |
|---------------------------------------------------------|----------|----------|----------|-----------|
| <i>Polystichum disjunctum</i>                           | MK174902 | -        | MK214701 | -         |
| <i>Polystichum dracomontanum</i>                        | AF537240 | -        | KX768085 | EF177290  |
| <i>Polystichum dudleyi</i>                              | MK776800 | -        | KX768086 | MK776837  |
| <i>Polystichum duthiei</i>                              | -        | KU244809 | KU244896 | KU244983  |
| <i>Polystichum ekmanii</i>                              | AF537242 | -        | -        | EF177272  |
| <i>Polystichum erosum</i>                               | KU244763 | KU244850 | KU244937 | KU245026  |
| <i>Polystichum eximium</i>                              | AB575191 | AB575810 | -        | -         |
| <i>Polystichum falcatilobum</i>                         | -        | KU244771 | KU244861 | KU244946  |
| <i>Polystichum falcinellum</i>                          | KX768055 | -        | KX768087 | -         |
| <i>Polystichum fallax</i>                               | AY163865 | -        | AY164625 | -         |
| <i>Polystichum fibrillosopaleaceum</i>                  | AB575192 | AB575811 | -        | -         |
| <i>Polystichum fimbriatum</i>                           | -        | KU244769 | KU244859 | KU244944  |
| <i>Polystichum formosanum</i>                           | AB575194 | AB575812 | -        | -         |
| <i>Polystichum fraxinellum</i>                          | -        | -        | -        | KU500173  |
| <i>Polystichum frigidicola</i>                          | KU244729 | KU244808 | KU244895 | KU244982  |
| <i>Polystichum garhwalicum</i>                          | MH179982 | -        | MH175169 | _MH179983 |
| <i>Polystichum glaciale</i>                             | KY241391 | KU244829 | KU244917 | KU245004  |
| <i>Polystichum gongboense</i>                           | KX768044 | -        | -        | -         |
| <i>Polystichum gracilipes</i> var.<br><i>gemmiferum</i> | AB575195 | AB575813 | -        | -         |
| <i>Polystichum grandifrons</i>                          | KU244719 | KU244792 | KU244879 | KU244966  |
| <i>Polystichum haleakalense</i>                         | KX768046 | -        | KX768088 | EF177278  |
| <i>Polystichum hancockii</i>                            | AB575197 | AB575815 | KX768070 | -         |
| <i>Polystichum hecatopterum</i>                         | -        | KU244854 | KU244939 | KU245030  |
| <i>Polystichum herbaceum</i>                            | MH159214 | KU244818 | MH175177 | KU244993  |
| <i>Polystichum hillebrandii</i>                         | EF463217 | -        | MH175173 | EF177279  |
| <i>Polystichum holttumii</i>                            | KX768059 | -        | KX768090 | -         |
| <i>Polystichum hookerianum</i>                          | LC496696 | KU244820 | KU244908 | KU244995  |
| <i>Polystichum horizontale</i>                          | KX768050 | -        | KX768091 | -         |
| <i>Polystichum hubeiense</i>                            | -        | KU244852 | -        | KU245029  |
| <i>Polystichum igaense</i>                              | AB575199 | AB575817 | -        | -         |
| <i>Polystichum imbricans</i>                            | KU244746 | KU244831 | KU244919 | KU245006  |
| <i>Polystichum imbricans</i> subsp.<br><i>curtum</i>    | MK776797 | -        | -        | MK776843  |
| <i>Polystichum incongruum</i>                           | KU244748 | KU244835 | KU244921 | KU245009  |
| <i>Polystichum jiucaipingense</i>                       | KU244702 | KU244766 | KU244856 | KU244941  |
| <i>Polystichum jiulaodongense</i>                       | -        | KU244851 | KU244938 | KU245027  |
| <i>Polystichum kruckebergii</i>                         | MG215036 | -        | -        | -         |
| <i>Polystichum kungianum</i>                            | KU244764 | -        | -        | KU245028  |
| <i>Polystichum lachenense</i>                           | KU244743 | KU244827 | KU662031 | KU662020  |
| <i>Polystichum latilepis</i>                            | KU244735 | KU244816 | KU244904 | KU244991  |
| <i>Polystichum lemmonii</i>                             | MG215073 | -        | KX768093 | -         |
| <i>Polystichum lentum</i>                               | AF537246 | -        | AY164637 | EF177293  |



|                                                          |          |          |          |          |
|----------------------------------------------------------|----------|----------|----------|----------|
| <i>Polystichum lepidocaulon</i>                          | KY806706 | AB575820 | -        | MH029286 |
| <i>Polystichum lepidotum</i>                             | KF020338 | -        | KF020415 | KF020367 |
| <i>Polystichum lonchitis</i>                             | MG215277 | -        | MK214705 | MK035863 |
| <i>Polystichum longifrons</i>                            | AB575204 | AB575821 | -        | -        |
| <i>Polystichum longipaleatum</i>                         | -        | -        | MK214706 | KU244951 |
| <i>Polystichum longispinosum</i>                         | KU244706 | KU244777 | KU244867 | -        |
| <i>Polystichum luctuosum</i>                             | KU244750 | KU244836 | KU244923 | KU245011 |
| <i>Polystichum macleae</i>                               | AF537249 | -        | KX768094 | EF177294 |
| <i>Polystichum maevaranense</i>                          | KU244747 | KU244833 | -        | KU245008 |
| <i>Polystichum makinoi</i>                               | AB575205 | AB575822 | DQ202462 | DQ202431 |
| <i>Polystichum manmiense</i>                             | KU244717 | KU244790 | KU244877 | KU244964 |
| <i>Polystichum maximum</i>                               | KF020318 | -        | KF020416 | KF020368 |
| <i>Polystichum microchlamys</i>                          | KX856980 | -        | KX856982 | KX856981 |
| <i>Polystichum microchlamys</i> var.<br><i>azumiense</i> | AB575207 | -        | -        | -        |
| <i>Polystichum mohrioides</i>                            | MK174904 | -        | MK214708 | MK035847 |
| <i>Polystichum montevidense</i>                          | EF177326 | -        | MK214710 | EF177282 |
| <i>Polystichum moorei</i>                                | -        | -        | AY164628 | KU245033 |
| <i>Polystichum moupinense</i>                            | KU244731 | KU244812 | KU244899 | KU244986 |
| <i>Polystichum mucronifolium</i>                         | KU244715 | KU244788 | KU244887 | KU244962 |
| <i>Polystichum multifidum</i>                            | MK174908 | -        | MK214711 | MK035856 |
| <i>Polystichum munitum</i>                               | MK776811 | JN189399 | MK214713 | MK776850 |
| <i>Polystichum muricatum</i>                             | AF537251 | -        | KF020404 | EF177275 |
| <i>Polystichum neolobatum</i>                            | AB575208 | -        | MH175167 | -        |
| <i>Polystichum nepalense</i>                             | KU244713 | KU662009 | KU662034 | KU244960 |
| <i>Polystichum nigrum</i>                                | KU244728 | KU244807 | KX768098 | KU244981 |
| <i>Polystichum nudisorum</i>                             | -        | KU662001 | KU662026 | KU662015 |
| <i>Polystichum obae</i>                                  | AB575209 | AB575824 | -        | -        |
| <i>Polystichum oculatum</i>                              | -        | -        | AY164633 | JX476120 |
| <i>Polystichum otomasui</i>                              | AB575211 | AB575826 | -        | -        |
| <i>Polystichum otophorum</i>                             | KU244711 | KU244784 | -        | KU244958 |
| <i>Polystichum ovatopaleaceum</i>                        | AB575212 | AB575827 | -        | -        |
| <i>Polystichum paleatum</i>                              | KY099848 | KY099979 | -        | -        |
| <i>Polystichum parvipinnulum</i>                         | KU244739 | KU244822 | KU244910 | KU244997 |
| <i>Polystichum piceopaleaceum</i>                        | LC496700 | AB575829 | -        | -        |
| <i>Polystichum platyphyllum</i>                          | MK174910 | -        | MK214714 | EF177285 |
| <i>Polystichum plicatum</i>                              | MK174911 | -        | MK214717 | MK035853 |
| <i>Polystichum polyblepharum</i>                         | AB575215 | KU244798 | KU244885 | KU244972 |
| <i>Polystichum polyphyllum</i>                           | KF020342 | -        | KF020418 | KF020374 |
| <i>Polystichum prescottianum</i>                         | KU662014 | KU662007 | KU662032 | KU662021 |
| <i>Polystichum proliferum</i>                            | AF208393 | KU662010 | AY164627 | KU245031 |
| <i>Polystichum pseudodeltodon</i>                        | -        | KU662002 | KU662027 | KU662016 |

|                                                          |          |          |          |          |
|----------------------------------------------------------|----------|----------|----------|----------|
| <i>Polystichum pseudomakinoi</i>                         | AB575217 | AB575832 | KX768100 | -        |
| <i>Polystichum pseudoxiphophyllum</i>                    | -        | KU244768 | KU244858 | KU244943 |
| <i>Polystichum punctiferum</i>                           | MK174914 | -        | MK214718 | -        |
| <i>Polystichum pungens</i>                               | -        | -        | KX768101 | -        |
| <i>Polystichum pycnopterum</i>                           | KU244714 | KU244787 | KU244874 | KU244961 |
| <i>Polystichum rapense</i>                               | -        | -        | KX768102 | -        |
| <i>Polystichum retrosopaleaceum</i>                      | KY806707 | AB575833 | -        | LC331598 |
| <i>Polystichum revolutum</i>                             | MH159217 | KU244779 | KX768103 | KU244953 |
| <i>Polystichum rigens</i>                                | KU244736 | KU244817 | MH175176 | KU244992 |
| <i>Polystichum scopulinum</i>                            | MG215298 | -        | KX768104 | -        |
| <i>Polystichum semifertile</i>                           | KU244718 | KU244791 | KU244878 | KU244965 |
| <i>Polystichum setiferum</i>                             | AF537254 | KU244799 | AY164638 | KU244973 |
| <i>Polystichum setigerum</i>                             | KX768038 | -        | -        | -        |
| <i>Polystichum sinense</i>                               | KU244751 | KU244842 | KU244928 | KU245017 |
| <i>Polystichum sinotsus-simense</i>                      | KU244733 | KU244813 | KU244901 | KU244988 |
| <i>Polystichum sozanense</i>                             | -        | KU244823 | KU244911 | KU244998 |
| <i>Polystichum speciosissimum</i>                        | -        | -        | KF020397 | DQ514517 |
| <i>Polystichum squarrosum</i>                            | -        | -        | MH175170 | MH101422 |
| <i>Polystichum stenophyllum</i>                          | MK174915 | KU244805 | KU662033 | KU244979 |
| <i>Polystichum stimulans</i>                             | MH159213 | -        | MH175172 | -        |
| <i>Polystichum subfimbriatum</i>                         | KU244721 | KU244794 | KU244881 | KU244968 |
| <i>Polystichum subintegerrimum</i>                       | MK174917 | -        | MK214723 | MK035858 |
| <i>Polystichum submarginale</i>                          | KU244707 | KU244778 | KU244868 | KU244952 |
| <i>Polystichum tagawanum</i>                             | AB575221 | AB575836 | -        | -        |
| <i>Polystichum talamancanum</i>                          | EF177335 | -        | KF020402 | EF177305 |
| <i>Polystichum tenuius</i>                               | KU244705 | KU244775 | KU244865 | KU245022 |
| <i>Polystichum tetragonum</i>                            | MK174918 | -        | MK214724 | MK035854 |
| <i>Polystichum thomsonii</i>                             | KU244744 | KU244789 | KU244876 | KU245003 |
| <i>Polystichum tonkinense</i>                            | KU244760 | KU244847 | KU244933 | KU245023 |
| <i>Polystichum transkeiense</i>                          | AF537257 | -        | KX768107 | EF177297 |
| <i>Polystichum tripteron</i>                             | KY014835 | KX068900 | MK214726 | -        |
| <i>Polystichum tsus-simense</i>                          | MH179977 | KU244815 | MH175182 | KU244990 |
| <i>Polystichum tsus-simense</i> var.<br><i>mayebarae</i> | AB575224 | AB575839 | -        | -        |
| <i>Polystichum vestitum</i>                              | AF208395 | -        | AY164635 | AY300046 |
| <i>Polystichum wawranum</i>                              | -        | -        | AY164636 | KU245032 |
| <i>Polystichum weimingii</i>                             | KU253818 | KU244821 | KU244909 | KU244996 |
| <i>Polystichum xiphophyllum</i>                          | KU244701 | KU244765 | KU244855 | KU244940 |
| <i>Polystichum yaanense</i>                              | KU244762 | KU244849 | KU244936 | KU245025 |
| <i>Polystichum yaeyamense</i>                            | AB575225 | AB575840 | -        | -        |
| <i>Polystichum yuanum</i>                                | KU244737 | KU244819 | KU244907 | KU244994 |
| <i>Polystichum yunnanense</i>                            | -        | -        | KX768109 | -        |

|                                 |          |          |          |          |
|---------------------------------|----------|----------|----------|----------|
| <i>Polystichum cavernicola</i>  | -        | -        | JF713056 | -        |
| <i>Polystichum minutissimum</i> | -        | -        | JF827028 | -        |
| <i>Polystichum fengshanense</i> | -        | -        | JF827030 | -        |
| <i>Polystichum speluncicola</i> | -        | -        | -        | GQ244334 |
| <i>Polystichum cavernicola</i>  | -        | -        | -        | JF713056 |
| <i>Polystichum fengshanense</i> | -        | -        | -        | JF827029 |
| <i>Polystichum minutissimum</i> | -        | -        | -        | JF827028 |
| <i>Arachniodes denticulata</i>  | JN189533 | JN189425 | JN189207 | JN189102 |
| <i>Arachniodes standishii</i>   | EF540722 | AB575713 | EF540709 | EF540700 |
| <i>Cyrtogonellum inaequalis</i> | AY694812 | -        | -        | AY736351 |
| <i>Cyrtogonellum xichouense</i> | DQ054515 | -        | DQ202441 | EU106595 |
| <i>Cyrtomidictyum faberi</i>    | EF463124 | -        | EF540710 | EF540697 |
| <i>Cyrtomium caryotideum</i>    | KU244741 | KU244825 | KU244913 | KU245000 |
| <i>Cyrtomium grossum</i>        | AY694805 | -        | -        | AY736341 |
| <i>Cyrtomium hemionitis</i>     | AY694802 | -        | -        | AY736338 |
| <i>Cyrtomium macrophyllum</i>   | KU244740 | KU244824 | KU244912 | KU244999 |
| <i>Cyrtomium omeiense</i>       | KU244742 | KU244826 | KU244914 | KU245001 |
| <i>Cyrtomium urophyllum</i>     | AY545492 | -        | DQ202448 | AY736333 |
| <i>Dryopteris bissetiana</i>    | JN189587 | JN189479 | JN189261 | AY268796 |
| <i>Dryopteris chinensis</i>     | JX535859 | JN189433 | JN189215 | JN189110 |
| <i>Dryopteris scottii</i>       | DQ508775 | JN189444 | JN189226 | DQ514498 |
| <i>Phanerophlebia nobilis</i>   | JN189569 | JN189459 | JN189242 | -        |
| <i>Phanerophlebia umbonata</i>  | AF537233 | -        | -        | DQ514513 |

---

407 *Hymenasplenium* (Aspleniaceae)

| Species                                  | <i>atpB</i> | <i>rbcL</i> | <i>trnL-F</i> | <i>rps4-trnS</i> |
|------------------------------------------|-------------|-------------|---------------|------------------|
| <i>Hymenasplenium adiantifrons</i>       | -           | -           | MH065560      | MH065323         |
| <i>Hymenasplenium apogamum</i>           | MH065518    | MH065437    | MH065604      | MH065376         |
| <i>Hymenasplenium cardiophyllum</i>      | MH065454    | MH065387    | MH065534      | MH065306         |
| <i>Hymenasplenium cheilosorum</i>        | MH065492    | MH065421    | MH065575      | MH065362         |
| <i>Hymenasplenium delitescens</i>        | MH065522    | MH065443    | MH065609      | MH065338         |
| <i>Hymenasplenium excisum</i>            | MH065450    | MH065383    | MH065531      | MH065344         |
| <i>Hymenasplenium filipes</i>            | MH065481    | MH065409    | MH065557      | MH065320         |
| <i>Hymenasplenium hastifolium</i>        | MH065469    | MH065398    | MH065547      | MH065313         |
| <i>Hymenasplenium hoffmannii</i>         | MH065521    | MH065442    | MH065608      | MH065337         |
| <i>Hymenasplenium hondoense</i>          | -           | AB014705    | -             | -                |
| <i>Hymenasplenium laetum</i>             | KM114105    | AB014707    | -             | -                |
| <i>Hymenasplenium latidens</i>           | -           | -           | MH065566      | -                |
| <i>Hymenasplenium murakami-hatanakae</i> | EF452020    | EF452140    | -             | -                |
| <i>Hymenasplenium obliquissimum</i>      | MH065485    | MH065413    | MH065569      | MH065356         |
| <i>Hymenasplenium obscurum</i>           | MH065447    | MH065380    | MH065530      | MH065342         |
| <i>Hymenasplenium pseudobscurum</i>      | -           | -           | MH065565      | -                |
| <i>Hymenasplenium retusulum</i>          | MH065446    | MH065379    | MH065529      | MH065304         |
| <i>Hymenasplenium riparium</i>           | -           | AB014708    | -             | -                |
| <i>Hymenasplenium subnormale</i>         | MH065527    | -           | MH065613      | -                |
| <i>Hymenasplenium triquetrum</i>         | MH065523    | MH065444    | MH065610      | MH065339         |
| <i>Hymenasplenium unilaterale</i>        | -           | AF240652    | AF525232      | -                |
| <i>Hymenasplenium wildii</i>             | -           | KP774927    | KP851919      | KP851877         |
| <i>Hymenasplenium wuliangshanense</i>    | MH065478    | MH065407    | MH065554      | MH065318         |
| <i>Hymenasplenium quangnamense</i>       | -           | LC427111    | -             | -                |
| <i>Hymenasplenium wangpeishanii</i>      | MK826311    | MK826814    | MK827841      | -                |
| <i>Asplenium aegaeum</i>                 | -           | AY300103    | AY300050      | AY549774         |
| <i>Asplenium cuspidatum</i>              | -           | AY300111    | AY300058      | AY549760         |
| <i>Asplenium dielfalcatum</i>            | -           | AY549738    | AY549841      | AY549787         |
| <i>Asplenium flabellifolium</i>          | -           | AY300115    | AY300062      | AY549779         |
| <i>Asplenium normale</i>                 | -           | KP774926    | KP851904      | KP835419         |
| <i>Asplenium polyodon</i>                | -           | KP774900    | KP835397      | KP835433         |
| <i>Asplenium trichomanes</i>             | -           | AY549743    | AY549846      | AY549792         |
| <i>Asplenium varians</i>                 | -           | AY300147    | AY300094      | AY549802         |
| <i>Asplenium wrightii</i>                | -           | AY549730    | AY549833      | AY549766         |
| <i>Asplenium yunnanense</i>              | -           | AY300149    | AY300096      | AY549803         |
| <i>Hemidictyum marginatum</i>            | -           | KT329397    | KT329423      | KT329410         |
| <i>Gymnocarpium oyamense</i>             | -           | AB574995    | AF515248      | JN168095         |
| <i>Gymnocarpium jessoense</i>            | -           | AB574994    | -             | JN168094         |
| <i>Cystopteris reevesiana</i>            | -           | EF452149    | -             | -                |

| Species                            | ITS      | <i>matK</i> | <i>ndhF</i> | <i>rbcL</i> | <i>rpl16</i> | <i>rps16</i> | <i>atpF-atpH</i> | <i>atpB-rbcL</i> | <i>rpl20-rps12</i> | <i>rpl32-trnL</i> | <i>trnH-psbA</i> | <i>trnL-F</i> | <i>trnS-trnG</i> |
|------------------------------------|----------|-------------|-------------|-------------|--------------|--------------|------------------|------------------|--------------------|-------------------|------------------|---------------|------------------|
| <i>Anagallis acuminata</i>         | MG877747 | MG950415    | -           | MG950521    | -            | MG951049     | MG950730         | MG950628         | MG950837           | MG950942          | MG951155         | MG951263      | MG951370         |
| <i>Anagallis alternifolia</i>      | MG877748 | MG950416    | -           | MG950522    | -            | MG951050     | MG950731         | MG950629         | MG950838           | MG950943          | MG951156         | MG951264      | MG951371         |
| <i>Anagallis angustiloba</i>       | AY855134 | -           | AY856419    | -           | EU150393     | EU150413     | -                | -                | -                  | -                 | -                | AY855110      | -                |
| <i>Anagallis arvensis</i>          | MG877749 | MG950417    | -           | MG950523    | -            | MG951051     | MG950732         | MG950630         | MG950839           | MG950944          | MG951157         | MG951265      | MG951372         |
| <i>Anagallis crassifolia</i>       | AY855136 | -           | AY856421    | -           | EU150401     | EU150421     | -                | -                | -                  | -                 | -                | AY855106      | -                |
| <i>Anagallis djalonis</i>          | AY855137 | -           | AY856422    | -           | EU150390     | EU150410     | -                | -                | -                  | -                 | -                | AY855107      | -                |
| <i>Anagallis filiformis</i>        | MG877750 | -           | -           | -           | -            | -            | MG950733         | -                | -                  | -                 | -                | MG951266      | -                |
| <i>Anagallis hexamera</i>          | MG877751 | -           | -           | -           | -            | -            | MG950734         | -                | -                  | -                 | MG951158         | MG951267      | -                |
| <i>Anagallis huttonii</i>          | AY855140 | -           | AY856425    | -           | EU150392     | EU150412     | -                | -                | -                  | -                 | -                | AY855117      | -                |
| <i>Anagallis kingaensis</i>        | AY855141 | -           | AY856426    | -           | EU150395     | EU150415     | -                | -                | -                  | -                 | -                | AY855111      | -                |
| <i>Anagallis kochii</i>            | AY855142 | -           | AY856427    | -           | EU150389     | EU150409     | -                | -                | -                  | -                 | -                | AY855108      | -                |
| <i>Anagallis minima</i>            | AY855143 | -           | AY856428    | -           | EU150400     | EU150420     | -                | -                | -                  | -                 | -                | AY855120      | -                |
| <i>Anagallis monelli</i>           | MG877752 | MG950418    | -           | MG950524    | -            | MG951052     | MG950735         | MG950631         | MG950840           | MG950945          | MG951159         | MG951268      | MG951373         |
| <i>Anagallis nummularifolia</i>    | AY855145 | -           | AY856429    | -           | EU150391     | EU150411     | -                | -                | -                  | -                 | -                | AY855105      | -                |
| <i>Anagallis oligantha</i>         | AY855146 | -           | AY856430    | -           | EU150396     | EU150416     | -                | -                | -                  | -                 | -                | AY855114      | -                |
| <i>Anagallis pumila</i>            | MG877753 | MG950419    | -           | MG950525    | -            | MG951053     | MG950736         | MG950632         | MG950841           | MG950946          | MG951160         | MG951269      | MG951374         |
| <i>Anagallis rhodesiaca</i>        | AY855148 | -           | AY856432    | -           | EU150386     | EU150406     | -                | -                | -                  | -                 | -                | AY855104      | -                |
| <i>Anagallis rubricaulis</i>       | EU150424 | -           | EU169017    | -           | EU150387     | EU150407     | -                | -                | -                  | -                 | -                | EU150425      | -                |
| <i>Anagallis serpens</i>           | AY855149 | -           | AY856433    | -           | EU150397     | EU150417     | -                | -                | -                  | -                 | -                | AY855113      | -                |
| <i>Anagallis tenella</i>           | AY855150 | -           | AY856434    | -           | EU150402     | EU150422     | -                | -                | -                  | -                 | -                | AY855116      | -                |
| <i>Anagallis tenuicaulis</i>       | AY855151 | -           | AY856435    | -           | EU150388     | EU150408     | -                | -                | -                  | -                 | -                | AY855103      | -                |
| <i>Asterolinon adoëense</i>        | MG877755 | MG950421    | -           | MG950527    | -            | MG951055     | MG950738         | MG950634         | -                  | MG950948          | MG951162         | MG951271      | MG951376         |
| <i>Asterolinon linum-stellatum</i> | MG877756 | MG950422    | -           | MG950528    | -            | MG951056     | MG950739         | MG950635         | MG950843           | MG950949          | MG951163         | MG951272      | MG951377         |
| <i>Glaux maritima</i>              | MG877758 | MG950424    | -           | MG950530    | -            | MG951058     | MG950741         | MG950637         | MG950845           | MG950951          | MG951165         | MG951274      | MG951379         |
| <i>Lysimachia alfredii</i>         | MG877759 | MG950425    | -           | MG950531    | -            | MG951059     | MG950742         | MG950638         | MG950846           | MG950952          | MG951166         | MG951275      | MG951380         |
| <i>Lysimachia alpestris</i>        | MG877760 | MG950426    | -           | MG950532    | -            | MG951060     | MG950743         | MG950639         | MG950847           | MG950953          | MG951167         | MG951276      | MG951381         |
| <i>Lysimachia andina</i>           | MG877761 | MG950427    | -           | MG950533    | -            | MG951061     | MG950744         | MG950640         | MG950848           | MG950954          | MG951168         | MG951277      | MG951382         |
| <i>Lysimachia auriculata</i>       | MG877762 | MG950428    | -           | MG950534    | -            | MG951062     | MG950745         | MG950641         | MG950849           | MG950955          | MG951169         | MG951278      | MG951383         |
| <i>Lysimachia barystachys</i>      | MG877763 | MG950429    | -           | MG950535    | -            | MG951063     | MG950746         | MG950642         | MG950850           | MG950956          | MG951170         | MG951279      | MG951384         |
| <i>Lysimachia baviensis</i>        | MG877790 | MG950456    | -           | MG950562    | -            | MG951090     | MG950773         | MG950668         | MG950877           | MG950983          | MG951197         | MG951306      | MG951410         |
| <i>Lysimachia candida</i>          | MG877764 | MG950430    | -           | MG950536    | -            | MG951064     | MG950747         | MG950643         | MG950851           | MG950957          | MG951171         | MG951280      | MG951385         |
| <i>Lysimachia capillipes</i>       | MG877765 | MG950431    | -           | MG950537    | -            | MG951065     | MG950748         | MG950644         | MG950852           | MG950958          | MG951172         | MG951281      | MG951386         |
| <i>Lysimachia chapaensis</i>       | MG877766 | MG950432    | -           | MG950538    | -            | MG951066     | MG950749         | MG950645         | MG950853           | MG950959          | MG951173         | MG951282      | MG951387         |
| <i>Lysimachia chekiangensis</i>    | MG877767 | MG950433    | -           | MG950539    | -            | MG951067     | MG950750         | MG950646         | MG950854           | MG950960          | MG951174         | MG951283      | MG951388         |
| <i>Lysimachia chenopodioides</i>   | MG877768 | MG950434    | -           | MG950540    | -            | MG951068     | MG950751         | MG950647         | MG950855           | MG950961          | MG951175         | MG951284      | MG951389         |
| <i>Lysimachia chikungensis</i>     | MG877769 | MG950435    | -           | MG950541    | -            | MG951069     | MG950752         | MG950648         | MG950856           | MG950962          | MG951176         | MG951285      | MG951390         |
| <i>Lysimachia christinae</i>       | MG877770 | MG950436    | -           | MG950542    | -            | MG951070     | MG950753         | MG950649         | MG950857           | MG950963          | MG951177         | MG951286      | MG951391         |
| <i>Lysimachia ciliata</i>          | MG877771 | MG950437    | -           | MG950543    | -            | MG951071     | MG950754         | MG950650         | MG950858           | MG950964          | MG951178         | MG951287      | MG951392         |
| <i>Lysimachia circaeoides</i>      | MG877772 | MG950438    | -           | MG950544    | -            | MG951072     | MG950755         | MG950651         | MG950859           | MG950965          | MG951179         | MG951288      | MG951393         |
| <i>Lysimachia clethroides</i>      | MG877773 | MG950439    | -           | MG950545    | -            | MG951073     | MG950756         | MG950652         | MG950860           | MG950966          | MG951180         | MG951289      | MG951394         |
| <i>Lysimachia confertifolia</i>    | MG877774 | MG950440    | -           | MG950546    | -            | MG951074     | MG950757         | -                | MG950861           | MG950967          | MG951181         | MG951290      | -                |
| <i>Lysimachia congestiflora</i>    | MG877775 | MG950441    | -           | MG950547    | -            | MG951075     | MG950758         | MG950653         | MG950862           | MG950968          | MG951182         | MG951291      | MG951395         |
| <i>Lysimachia crispidens</i>       | MG877776 | MG950442    | -           | MG950548    | -            | MG951076     | MG950759         | MG950654         | MG950863           | MG950969          | MG951183         | MG951292      | MG951396         |

|                                  |          |          |   |          |          |          |          |          |          |          |          |          |          |
|----------------------------------|----------|----------|---|----------|----------|----------|----------|----------|----------|----------|----------|----------|----------|
| <i>Lysimachia daphnoides</i>     | GQ258035 | -        | - | -        | GQ257893 | GQ257940 | -        | -        | GQ257916 | -        | GQ257963 | -        | GQ257987 |
| <i>Lysimachia davurica</i>       | MG877777 | MG950443 | - | MG950549 | -        | MG951077 | MG950760 | MG950655 | MG950864 | MG950970 | MG951184 | MG951293 | MG951397 |
| <i>Lysimachia decurrens</i>      | MG877778 | MG950444 | - | MG950550 | -        | MG951078 | MG950761 | MG950656 | MG950865 | MG950971 | MG951185 | MG951294 | MG951398 |
| <i>Lysimachia deltoidea</i>      | MG877779 | MG950445 | - | MG950551 | -        | MG951079 | MG950762 | MG950657 | MG950866 | MG950972 | MG951186 | MG951295 | MG951399 |
| <i>Lysimachia dextrosiflora</i>  | MG877780 | MG950446 | - | MG950552 | -        | MG951080 | MG950763 | MG950658 | MG950867 | MG950973 | MG951187 | MG951296 | MG951400 |
| <i>Lysimachia drymarifolia</i>   | MG877781 | MG950447 | - | MG950553 | -        | MG951081 | MG950764 | MG950659 | MG950868 | MG950974 | MG951188 | MG951297 | MG951401 |
| <i>Lysimachia englerii</i>       | MG877782 | MG950448 | - | MG950554 | -        | MG951082 | MG950765 | MG950660 | MG950869 | MG950975 | MG951189 | MG951298 | MG951402 |
| <i>Lysimachia ephemerum</i>      | MG877783 | MG950449 | - | MG950555 | -        | MG951083 | MG950766 | MG950661 | MG950870 | MG950976 | MG951190 | MG951299 | MG951403 |
| <i>Lysimachia erosipetala</i>    | MG877784 | MG950450 | - | MG950556 | -        | MG951084 | MG950767 | MG950662 | MG950871 | MG950977 | MG951191 | MG951300 | MG951404 |
| <i>Lysimachia fanii</i>          | MK516276 | -        | - | -        | -        | -        | MK516269 | -        | -        | MK516271 | -        | MK516273 | MK516274 |
| <i>Lysimachia filifolia</i>      | MG877785 | MG950451 | - | MG950557 | -        | MG951085 | MG950768 | MG950663 | MG950872 | MG950978 | MG951192 | MG951301 | MG951405 |
| <i>Lysimachia fistulosa</i>      | MG877786 | MG950452 | - | MG950558 | -        | MG951086 | MG950769 | MG950664 | MG950873 | MG950979 | MG951193 | MG951302 | MG951406 |
| <i>Lysimachia foenum-graecum</i> | MG877787 | MG950453 | - | MG950559 | -        | MG951087 | MG950770 | MG950665 | MG950874 | MG950980 | MG951194 | MG951303 | MG951407 |
| <i>Lysimachia fordiana</i>       | MG877788 | MG950454 | - | MG950560 | -        | MG951088 | MG950771 | MG950666 | MG950875 | MG950981 | MG951195 | MG951304 | MG951408 |
| <i>Lysimachia fortunei</i>       | MG877789 | MG950455 | - | MG950561 | -        | MG951089 | MG950772 | MG950667 | MG950876 | MG950982 | MG951196 | MG951305 | MG951409 |
| <i>Lysimachia glanduliflora</i>  | MG877791 | MG950457 | - | MG950563 | -        | MG951091 | MG950774 | MG950669 | MG950878 | MG950984 | MG951198 | MG951307 | MG951411 |
| <i>Lysimachia glutinosa</i>      | MG877792 | MG950458 | - | MG950564 | -        | MG951092 | MG950775 | MG950670 | MG950879 | MG950985 | MG951199 | MG951308 | MG951412 |
| <i>Lysimachia grammica</i>       | MG877793 | MG950459 | - | MG950565 | -        | MG951093 | MG950776 | MG950671 | MG950880 | MG950986 | MG951200 | MG951309 | MG951413 |
| <i>Lysimachia hemsleyana</i>     | MG877794 | MG950460 | - | MG950566 | -        | MG951094 | MG950777 | MG950672 | MG950881 | MG950987 | MG951201 | -        | -        |
| <i>Lysimachia hemsleyi</i>       | MG877795 | MG950461 | - | MG950567 | -        | MG951095 | MG950778 | MG950673 | MG950882 | MG950988 | MG951202 | MG951310 | MG951414 |
| <i>Lysimachia heterobotrys</i>   | MG877796 | MG950462 | - | MG950568 | -        | MG951096 | MG950779 | MG950674 | MG950883 | MG950989 | MG951203 | MG951311 | MG951415 |
| <i>Lysimachia heterogenea</i>    | MG877797 | MG950463 | - | MG950569 | -        | MG951097 | MG950780 | MG950675 | MG950884 | MG950990 | MG951204 | MG951312 | MG951416 |
| <i>Lysimachia hillebrandii</i>   | MG877798 | MG950464 | - | MG950570 | -        | MG951098 | MG950781 | -        | MG950885 | MG950991 | MG951205 | MG951313 | MG951417 |
| <i>Lysimachia hybrida</i>        | MG877799 | MG950465 | - | MG950571 | -        | MG951099 | MG950782 | MG950676 | MG950886 | MG950992 | MG951206 | MG951314 | MG951418 |
| <i>Lysimachia iniki</i>          | MG877800 | MG950466 | - | MG950572 | -        | MG951100 | MG950783 | MG950677 | MG950887 | MG950993 | MG951207 | MG951315 | MG951419 |
| <i>Lysimachia insignis</i>       | MG877801 | MG950467 | - | MG950573 | -        | MG951101 | MG950784 | MG950678 | MG950888 | MG950994 | MG951208 | MG951316 | MG951420 |
| <i>Lysimachia japonica</i>       | MG877802 | MG950468 | - | MG950574 | -        | MG951102 | MG950785 | MG950679 | MG950889 | MG950995 | MG951209 | MG951317 | MG951421 |
| <i>Lysimachia kalalauensis</i>   | GQ258044 | -        | - | -        | GQ257902 | GQ257950 | -        | -        | GQ257925 | -        | GQ257972 | -        | GQ257998 |
| <i>Lysimachia klattiana</i>      | MG877803 | MG950469 | - | MG950575 | -        | MG951103 | MG950786 | MG950680 | MG950890 | MG950996 | MG951210 | MG951318 | MG951422 |
| <i>Lysimachia lanceolata</i>     | MG877804 | MG950470 | - | MG950576 | -        | MG951104 | MG950787 | MG950681 | MG950891 | MG950997 | MG951211 | MG951319 | MG951423 |
| <i>Lysimachia lancifolia</i>     | MG877805 | MG950471 | - | MG950577 | -        | MG951105 | MG950788 | MG950682 | MG950892 | MG950998 | MG951212 | MG951320 | MG951424 |
| <i>Lysimachia laxa</i>           | MG877806 | MG950472 | - | MG950578 | -        | MG951106 | MG950789 | MG950683 | MG950893 | MG950999 | MG951213 | MG951321 | MG951425 |
| <i>Lysimachia lichiangensis</i>  | MG877807 | MG950473 | - | MG950579 | -        | MG951107 | MG950790 | MG950684 | MG950894 | MG951000 | MG951214 | MG951322 | MG951426 |
| <i>Lysimachia lobelioidies</i>   | MG877808 | MG950474 | - | MG950580 | -        | MG951108 | MG950791 | MG950685 | MG950895 | MG951001 | MG951215 | MG951323 | MG951427 |
| <i>Lysimachia longipes</i>       | MG877809 | MG950475 | - | MG950581 | -        | MG951109 | MG950792 | MG950686 | MG950896 | MG951002 | MG951216 | MG951324 | MG951428 |
| <i>Lysimachia mauritiana</i>     | MG877810 | MG950476 | - | MG950582 | -        | MG951110 | MG950793 | MG950687 | MG950897 | MG951003 | MG951217 | MG951325 | MG951429 |
| <i>Lysimachia maxima</i>         | GQ258047 | -        | - | -        | GQ257906 | GQ257953 | -        | -        | GQ257929 | -        | GQ257976 | -        | GQ258002 |
| <i>Lysimachia melampyroides</i>  | MG877811 | MG950477 | - | MG950583 | -        | MG951111 | MG950794 | MG950688 | MG950898 | MG951004 | MG951218 | MG951326 | MG951430 |
| <i>Lysimachia menoricensis</i>   | MG877812 | MG950478 | - | MG950584 | -        | MG951112 | MG950795 | MG950689 | MG950899 | MG951005 | MG951219 | MG951327 | MG951431 |
| <i>Lysimachia mexicana</i>       | -        | -        | - | -        | -        | -        | -        | -        | -        | -        | MG951220 | -        | -        |
| <i>Lysimachia microcarpa</i>     | MG877813 | MG950479 | - | MG950585 | -        | MG951113 | MG950796 | MG950690 | MG950900 | MG951006 | MG951221 | MG951328 | MG951432 |
| <i>Lysimachia millietii</i>      | MG877814 | MG950480 | - | MG950586 | -        | MG951114 | MG950797 | MG950691 | MG950901 | MG951007 | MG951222 | MG951329 | MG951433 |
| <i>Lysimachia nanchuanensis</i>  | MG877815 | MG950481 | - | MG950587 | -        | MG951115 | MG950798 | MG950692 | MG950902 | MG951008 | MG951223 | MG951330 | MG951434 |
| <i>Lysimachia nemorum</i>        | MG877816 | MG950482 | - | MG950588 | -        | MG951116 | MG950799 | MG950693 | MG950903 | MG951009 | MG951224 | MG951331 | MG951435 |
| <i>Lysimachia nummularia</i>     | MG877817 | MG950483 | - | MG950589 | -        | MG951117 | MG950800 | MG950694 | MG950904 | MG951010 | MG951225 | MG951332 | MG951436 |
| <i>Lysimachia nutantiflora</i>   | MG877818 | MG950484 | - | MG950590 | -        | MG951118 | MG950801 | MG950695 | MG950905 | MG951011 | MG951226 | MG951333 | MG951437 |

|                                  |          |          |   |          |          |          |          |          |          |          |          |          |          |
|----------------------------------|----------|----------|---|----------|----------|----------|----------|----------|----------|----------|----------|----------|----------|
| <i>Lysimachia omeiensis</i>      | MG877819 | MG950485 | - | MG950591 | -        | MG951119 | MG950802 | MG950696 | MG950906 | MG951012 | MG951227 | MG951334 | MG951438 |
| <i>Lysimachia ovoidea</i>        | -        | -        | - | -        | GQ257907 | GQ257954 | -        | -        | GQ257930 | -        | GQ257977 | -        | GQ258003 |
| <i>Lysimachia paridiformis</i>   | MG877820 | MG950486 | - | MG950592 | -        | MG951120 | MG950803 | MG950697 | MG950907 | MG951013 | MG951228 | MG951335 | MG951439 |
| <i>Lysimachia patungensis</i>    | MG877821 | MG950487 | - | MG950593 | -        | MG951121 | MG950804 | MG950698 | MG950908 | MG951014 | MG951229 | MG951336 | MG951440 |
| <i>Lysimachia peduncularis</i>   | MG877822 | MG950488 | - | MG950594 | -        | MG951122 | MG950805 | MG950699 | MG950909 | MG951015 | MG951230 | MG951337 | -        |
| <i>Lysimachia pendens</i>        | GQ258048 | -        | - | -        | -        | -        | -        | -        | GQ257931 | -        | -        | -        | GQ258004 |
| <i>Lysimachia pentapetala</i>    | MG877823 | MG950489 | - | MG950595 | -        | MG951123 | MG950806 | MG950700 | MG950910 | MG951016 | MG951231 | MG951338 | MG951441 |
| <i>Lysimachia perfoliata</i>     | MG877824 | MG950490 | - | MG950596 | -        | MG951124 | MG950807 | MG950701 | MG950911 | MG951017 | MG951232 | MG951339 | MG951442 |
| <i>Lysimachia petelotii</i>      | MG877825 | MG950491 | - | MG950597 | -        | MG951125 | MG950808 | MG950702 | MG950912 | MG951018 | MG951233 | MG951340 | MG951443 |
| <i>Lysimachia phyllocephala</i>  | MG877826 | MG950492 | - | MG950598 | -        | MG951126 | MG950809 | MG950703 | MG950913 | MG951019 | MG951234 | MG951341 | MG951444 |
| <i>Lysimachia pittosporoides</i> | MG877827 | MG950493 | - | MG950599 | -        | MG951127 | MG950810 | MG950704 | MG950914 | MG951020 | MG951235 | MG951342 | MG951445 |
| <i>Lysimachia pseudohenryi</i>   | MG877828 | MG950494 | - | MG950600 | -        | MG951128 | MG950811 | MG950705 | MG950915 | MG951021 | MG951236 | MG951343 | MG951446 |
| <i>Lysimachia pumila</i>         | MG877829 | MG950495 | - | MG950601 | -        | MG951129 | MG950812 | MG950706 | MG950916 | MG951022 | MG951237 | MG951344 | MG951447 |
| <i>Lysimachia punctata</i>       | MG877830 | MG950496 | - | MG950602 | -        | MG951130 | MG950813 | MG950707 | MG950917 | MG951023 | MG951238 | MG951345 | MG951448 |
| <i>Lysimachia punctatilimba</i>  | MG877831 | MG950497 | - | MG950603 | -        | MG951131 | MG950814 | MG950708 | MG950918 | MG951024 | MG951239 | MG951346 | MG951449 |
| <i>Lysimachia quadriflora</i>    | MG877832 | MG950498 | - | MG950604 | -        | MG951132 | -        | -        | MG950919 | MG951025 | -        | MG951347 | -        |
| <i>Lysimachia quadrifolia</i>    | MG877833 | MG950499 | - | MG950605 | -        | MG951133 | MG950815 | MG950709 | MG950920 | MG951026 | MG951240 | MG951348 | MG951450 |
| <i>Lysimachia radicans</i>       | MG877834 | -        | - | MG950606 | -        | -        | -        | -        | -        | MG951027 | MG951241 | -        | -        |
| <i>Lysimachia remyi</i>          | MG877835 | MG950500 | - | MG950607 | -        | MG951134 | MG950816 | MG950710 | MG950921 | MG951028 | MG951242 | MG951349 | MG951451 |
| <i>Lysimachia rubiginosa</i>     | MG877836 | MG950501 | - | MG950608 | -        | MG951135 | MG950817 | MG950711 | MG950922 | MG951029 | MG951243 | MG951350 | MG951452 |
| <i>Lysimachia ruhmeriana</i>     | MG877837 | MG950502 | - | MG950609 | -        | MG951136 | MG950818 | MG950712 | MG950923 | MG951030 | MG951244 | MG951351 | MG951453 |
| <i>Lysimachia scopulensis</i>    | GQ258054 | -        | - | -        | GQ257913 | GQ257960 | -        | -        | GQ257937 | -        | GQ257983 | -        | GQ258010 |
| <i>Lysimachia serpyllifolia</i>  | MG877838 | MG950503 | - | MG950610 | -        | MG951137 | MG950819 | MG950713 | MG950924 | MG951031 | MG951245 | MG951352 | MG951454 |
| <i>Lysimachia shimianensis</i>   | MG877839 | MG950504 | - | MG950611 | -        | MG951138 | MG950820 | MG950714 | MG950925 | MG951032 | MG951246 | MG951353 | MG951455 |
| <i>Lysimachia silvestrii</i>     | MG877840 | MG950505 | - | MG950612 | -        | MG951139 | MG950821 | MG950715 | MG950926 | MG951033 | MG951247 | MG951354 | MG951456 |
| <i>Lysimachia stenosepala</i>    | MG877841 | MG950506 | - | MG950613 | -        | MG951140 | MG950822 | MG950716 | MG950927 | MG951034 | MG951248 | MG951355 | MG951457 |
| <i>Lysimachia taliensis</i>      | MG877842 | MG950507 | - | MG950614 | -        | MG951141 | MG950823 | MG950717 | MG950928 | MG951035 | MG951249 | MG951356 | MG951458 |
| <i>Lysimachia terrestris</i>     | MG877843 | MG950508 | - | MG950615 | -        | MG951142 | MG950824 | MG950718 | MG950929 | MG951036 | MG951250 | MG951357 | MG951459 |
| <i>Lysimachia thyrsiflora</i>    | MG877844 | MG950509 | - | MG950616 | -        | MG951143 | MG950825 | MG950719 | MG950930 | MG951037 | MG951251 | MG951358 | MG951460 |
| <i>Lysimachia trichopoda</i>     | MG877845 | MG950510 | - | MG950617 | -        | MG951144 | MG950826 | MG950720 | MG950931 | MG951038 | MG951252 | MG951359 | MG951461 |
| <i>Lysimachia verbascifolia</i>  | MG877846 | MG950511 | - | MG950618 | -        | MG951145 | MG950827 | MG950721 | MG950932 | MG951039 | MG951253 | MG951360 | MG951462 |
| <i>Lysimachia vittiformis</i>    | MG877847 | MG950512 | - | MG950619 | -        | MG951146 | MG950828 | MG950722 | MG950933 | MG951040 | MG951254 | MG951361 | MG951463 |
| <i>Lysimachia vulgaris</i>       | MG877848 | MG950513 | - | MG950620 | -        | MG951147 | MG950829 | -        | MG950934 | MG951041 | MG951255 | MG951362 | MG951464 |
| <i>Lysimachia waianaensis</i>    | GQ258056 | -        | - | -        | GQ257915 | GQ257962 | -        | -        | GQ257939 | -        | GQ257986 | -        | GQ258012 |
| <i>Pelletiera verna</i>          | MG877851 | MG950516 | - | MG950623 | -        | MG951150 | MG950832 | MG950725 | MG950937 | MG951044 | MG951258 | MG951365 | MG951467 |
| <i>Pelletiera wildpretii</i>     | MG877852 | MG950517 | - | MG950624 | -        | MG951151 | MG950833 | MG950726 | MG950938 | MG951045 | MG951259 | MG951366 | MG951468 |
| <i>Trientalis borealis</i>       | MG877854 | MG950519 | - | MG950626 | -        | MG951153 | MG950835 | MG950728 | MG950940 | MG951047 | MG951261 | MG951368 | MG951470 |
| <i>Trientalis europaea</i>       | MG877855 | MG950520 | - | MG950627 | -        | MG951154 | MG950836 | MG950729 | MG950941 | MG951048 | MG951262 | MG951369 | MG951471 |
| <i>Myrsine faberi</i>            | MG877849 | MG950514 | - | MG950621 | -        | MG951148 | MG950830 | MG950723 | MG950935 | MG951042 | MG951256 | MG951363 | MG951465 |
| <i>Ra neriifo</i>                | MG877853 | MG950518 | - | MG950625 | -        | MG951152 | MG950834 | MG950727 | MG950939 | MG951046 | MG951260 | MG951367 | MG951469 |
| <i>Myrsine semiserrata</i>       | MG877850 | MG950515 | - | MG950622 | -        | MG951149 | MG950831 | MG950724 | MG950936 | MG951043 | MG951257 | MG951364 | MG951466 |
| <i>Ardisia verbascifolia</i>     | MG877754 | MG950420 | - | MG950526 | -        | MG951054 | MG950737 | MG950633 | MG950842 | MG950947 | MG951161 | MG951270 | MG951375 |
| <i>Embelia ribes</i>             | MG877757 | MG950423 | - | MG950529 | -        | MG951057 | MG950740 | MG950636 | MG950844 | MG950950 | MG951164 | MG951273 | MG951378 |

409 *Mitreola* (Loganiaceae)

| Species                          | ITS      | ETS      | <i>matk</i> | <i>rbcL</i> | <i>petB-petD</i> | <i>psbA-trnH</i> |
|----------------------------------|----------|----------|-------------|-------------|------------------|------------------|
| <i>Mitreola petiolata</i>        | MK524298 | JX029177 | JQ588153    | JQ592401    | JX046123         | -                |
| <i>Mitreola petiolatoides</i>    | MF100716 | -        | -           | MF100724    | -                | MF100721         |
| <i>Mitreola pedicellata</i>      | MF100718 | -        | -           | MF100726    | -                | MF100719         |
| <i>Mitreola pingtaoi</i>         | MF100717 | -        | -           | MF100725    | -                | MF100722         |
| <i>Mitreola minima</i>           | -        | JX029168 | -           | -           | JX046121         | -                |
| <i>Mitreola sessilifolia</i>     | -        | JX029176 | KJ772948    | MH549923    | -                | -                |
| <i>Mitreola yangchunensis</i>    | -        | -        | NC050923    | NC050923    | NC050923         | NC050923         |
| <i>Geniostoma antherotrichum</i> | -        | JX029189 | -           | -           | JX046135         | -                |
| <i>Geniostoma rupestre</i>       | DQ499096 | JX029192 | KU564579    | KU564803    | JX046133         | -                |
| <i>Logania serpyllifolia</i>     | -        | JX029170 | -           | -           | JX046139         | -                |
| <i>Logania vaginalis</i>         | -        | -        | KJ815653    | Z68826      | KJ511473         | -                |
| <i>Logania albiflora</i>         | DQ358879 | JX029172 | AJ388273    | -           | KJ511468         | -                |



| Species                                                  | ITS      | 7FR      | 13FR     | 97FR     | 117FR    | 155FR    | 166FR    | 248FR    | 383FR    | <i>trnL-F</i> | <i>rpl32-trnL</i> | <i>atpB-rbcL</i> | <i>rpoB-trnC</i> | <i>trnC-petN</i> | <i>ndhA</i> -intron | <i>ndhH-rps15-ycf1</i> | <i>ycf1-1</i> | <i>ycf1-2</i> |
|----------------------------------------------------------|----------|----------|----------|----------|----------|----------|----------|----------|----------|---------------|-------------------|------------------|------------------|------------------|---------------------|------------------------|---------------|---------------|
| <i>Primulina alutacea</i>                                | KY394847 | KY395245 | KY395440 | KY395639 | KY395839 | KY396040 | KY395048 | -        | -        | KY393441      | KY393642          | KY393843         | KY394044         | KY394245         | KY394446            | KY394647               | -             | -             |
| <i>Primulina argentea</i>                                | KY394848 | KY395246 | KY395441 | KY395640 | KY395840 | KY396041 | KY395049 | -        | -        | KY393442      | KY393643          | KY393844         | KY394045         | KY394246         | KY394447            | KY394648               | -             | -             |
| <i>Primulina baishouensis</i>                            | KY394849 | KY395247 | KY395442 | KY395641 | KY395841 | KY396042 | KY395050 | -        | -        | KY393443      | KY393644          | KY393845         | KY394046         | KY394247         | KY394448            | KY394649               | -             | -             |
| <i>Primulina balansae</i>                                | MK747141 | -        | -        | MK746845 | MK764483 | MK746597 | MK746937 | MK746387 | MK746669 | MK746274      | MK746710          | MK779217         | MK775054         | MK746815         | MK746972            | MK747238               | MK747067      | MK765984      |
| <i>Primulina beiliuensis</i>                             | KY394850 | KY395248 | KY395443 | KY395642 | KY395842 | KY396043 | KY395051 | -        | -        | KY393444      | KY393645          | KY393846         | KY394047         | KY394248         | KY394449            | KY394650               | -             | -             |
| <i>Primulina beiliuensis</i> var. <i>fimbribracteata</i> | KY394851 | KY395249 | KY395444 | KY395643 | KY395843 | KY396044 | KY395052 | -        | -        | KY393445      | KY393646          | KY393847         | KY394048         | KY394249         | KY394450            | KY394651               | -             | -             |
| <i>Primulina bicolor</i>                                 | KY394852 | KY395250 | KY395445 | KY395644 | KY395844 | KY396045 | KY395053 | -        | -        | KY393446      | KY393647          | KY393848         | KY394049         | KY394250         | KY394451            | KY394652               | -             | -             |
| <i>Primulina bipinnatifida</i>                           | KY394853 | KY395251 | KY395446 | KY395645 | KY395845 | KY396046 | KY395054 | -        | -        | KY393447      | KY393648          | KY393849         | KY394050         | KY394251         | KY394452            | KY394653               | -             | -             |
| <i>Primulina bobaiensis</i>                              | KY394854 | KY395252 | KY395447 | KY395646 | KY395846 | KY396047 | KY395055 | -        | -        | KY393448      | KY393649          | KY393850         | KY394051         | KY394252         | KY394453            | KY394654               | -             | -             |
| <i>Primulina bogneriana</i>                              | MK747166 | -        | -        | MK746846 | MK764460 | MK746576 | MK746916 | MK746371 | MK746642 | MK746225      | MK746707          | MK779218         | MK775055         | MK746831         | MK746979            | MK747237               | MK747038      | MK765932      |
| <i>Primulina brachytricha</i>                            | KY394856 | KY395254 | KY395449 | KY395648 | KY395848 | KY396049 | KY395057 | -        | -        | KY393450      | KY393651          | KY393852         | KY394053         | KY394254         | KY394455            | KY394656               | -             | -             |
| <i>Primulina brassicoides</i>                            | MK747165 | -        | -        | MK746847 | MK764466 | MK746578 | MK746915 | MK746373 | MK746638 | MK746226      | MK746706          | MK779219         | MK775056         | MK746833         | MK746978            | MK747236               | MK747036      | MK765931      |
| <i>Primulina brunnea</i>                                 | MK747142 | -        | -        | MK746848 | MK764482 | MK746596 | MK746938 | MK746386 | MK746651 | MK746275      | MK746712          | MK779220         | MK775057         | MK746814         | MK746981            | MK747234               | MK747068      | MK765985      |
| <i>Primulina bullata</i>                                 | KY394857 | KY395255 | KY395450 | KY395649 | KY395849 | KY396050 | KY395058 | -        | -        | KY393451      | KY393652          | KY393853         | KY394054         | KY394255         | KY394456            | KY394657               | -             | -             |
| <i>Primulina cangwuensis</i>                             | MK747103 | -        | -        | MK746849 | MK764471 | MK746582 | MK746935 | MK746384 | MK746696 | MK746289      | MK746713          | MK779221         | MK775058         | MK746773         | MK746982            | MK747233               | MK747078      | MK765974      |
| <i>Primulina cardaminifolia</i>                          | MK747131 | -        | -        | MK746850 | MK764485 | MK746608 | MK746946 | MK746396 | MK746664 | MK746255      | MK746714          | MK779222         | MK775059         | MK746806         | MK746983            | MK747232               | MK747092      | MK765951      |
| <i>Primulina carinata</i>                                | KY394858 | KY395256 | KY395451 | KY395650 | KY395850 | KY396051 | KY395059 | -        | -        | KY393452      | KY393653          | KY393854         | KY394055         | KY394256         | KY394457            | KY394658               | -             | -             |
| <i>Primulina carnosifolia</i>                            | MK747124 | -        | -        | MK746851 | MK764474 | MK746588 | MK746953 | MK746419 | MK746693 | MK746268      | MK746715          | MK779223         | MK775060         | MK746783         | MK746984            | MK747231               | MK747086      | MK765976      |
| <i>Primulina chizhouensis</i>                            | KY394860 | KY395258 | KY395453 | KY395652 | KY395852 | KY396053 | KY395061 | -        | -        | KY393454      | KY393655          | KY393856         | KY394057         | KY394258         | KY394459            | KY394660               | -             | -             |
| <i>Primulina colaniae</i>                                | MK747167 | -        | -        | MK746852 | MK764461 | MK746577 | -        | MK746374 | MK746641 | MK746224      | MK746708          | MK779224         | MK775061         | MK746832         | MK746980            | -                      | MK747037      | MK765933      |
| <i>Primulina confertiflora</i>                           | MK747101 | -        | -        | MK746853 | MK764503 | MK746617 | MK746954 | MK746410 | MK746667 | MK746253      | MK746716          | MK779225         | MK775062         | MK746802         | MK746985            | -                      | MK747057      | MK765966      |
| <i>Primulina cordata</i>                                 | KY394862 | KY395260 | KY395455 | KY395654 | KY395854 | KY396055 | KY395063 | -        | -        | KY393456      | KY393657          | KY393858         | KY394059         | KY394260         | KY394461            | KY394662               | -             | -             |
| <i>Primulina cordifolia</i>                              | KY394863 | KY395261 | KY395456 | KY395655 | KY395855 | KY396056 | KY395064 | -        | -        | KY393457      | KY393658          | KY393859         | KY394060         | KY394261         | KY394462            | KY394663               | -             | -             |
| <i>Primulina cordistigma</i>                             | MK747118 | -        | -        | MK746854 | MK764469 | MK746581 | MK746931 | MK746424 | MK746690 | MK746251      | MK746718          | MK779226         | MK775063         | MK746801         | MK746986            | -                      | MK747077      | MK765981      |
| <i>Primulina crassirhizoma</i>                           | KY394864 | KY395262 | KY395457 | KY395656 | KY395856 | KY396057 | KY395065 | -        | -        | KY393458      | KY393659          | KY393860         | KY394061         | KY394262         | KY394463            | KY394664               | -             | -             |
| <i>Primulina crassituba</i>                              | MK747147 | -        | -        | MK746855 | -        | MK746580 | -        | MK746375 | MK746644 | MK746230      | MK746704          | MK779227         | -                | MK746830         | MK746976            | MK747227               | MK747033      | MK765935      |
| <i>Primulina curvituba</i>                               | MK747137 | -        | -        | MK746856 | MK764512 | MK746622 | -        | MK746391 | MK746676 | MK746242      | MK746734          | MK779228         | MK775064         | MK746813         | -                   | MK747226               | MK747066      | MK765963      |
| <i>Primulina danxiaensis</i>                             | KY394867 | KY395265 | KY395459 | KY395657 | KY395859 | KY396058 | KY395066 | -        | -        | KY393460      | KY393660          | KY393861         | KY394064         | KY394264         | KY394466            | KY394665               | -             | -             |
| <i>Primulina debaoensis</i>                              | MK747130 | KY395266 | KY395460 | MK746857 | MK764459 | KY396061 | MK746911 | MK746369 | MK746645 | MK746228      | MK746711          | KY393864         | KY394065         | KY394266         | KY394467            | KY394668               | MK747032      | MK765928      |
| <i>Primulina depressa</i>                                | KY394869 | KY395267 | KY395461 | KY395661 | KY395861 | KY396062 | KY395069 | -        | -        | KY393463      | KY393664          | KY393865         | KY394066         | KY394267         | KY394468            | KY394669               | -             | -             |
| <i>Primulina diffusa</i>                                 | KY394871 | KY395269 | KY395463 | KY395663 | KY395863 | KY396064 | KY395071 | -        | -        | KY393465      | KY393666          | KY393867         | KY394068         | KY394269         | KY394470            | KY394671               | -             | -             |
| <i>Primulina dongguanica</i>                             | KY394872 | KY395270 | KY395464 | KY395664 | KY395864 | KY396065 | KY395072 | -        | -        | KY393466      | KY393667          | KY393868         | KY394069         | KY394270         | KY394471            | KY394672               | -             | -             |
| <i>Primulina drakei</i>                                  | MK747164 | KY395271 | KY395465 | MK746858 | MK764465 | MK746575 | MK746914 | MK746366 | MK746646 | KY393467      | KY393668          | KY393869         | KY394070         | MK746829         | MK746973            | KY394673               | MK747034      | MK765934      |
| <i>Primulina dryas</i>                                   | KY394875 | KY395273 | KY395467 | KY395667 | KY395867 | KY396068 | KY395075 | -        | -        | KY393469      | KY393670          | KY393871         | KY394072         | KY394273         | KY394474            | KY394675               | -             | -             |
| <i>Primulina duanensis</i>                               | KY394877 | KY395275 | KY395469 | KY395669 | KY395869 | KY396070 | KY395077 | -        | -        | KY393471      | KY393672          | KY393873         | KY394074         | KY394275         | KY394476            | KY394677               | -             | -             |
| <i>Primulina eburnea east</i>                            | KY394878 | KY395276 | KY395470 | KY395670 | KY395870 | KY396071 | KY395078 | -        | -        | KY393472      | KY393673          | KY393874         | KY394075         | KY394276         | KY394477            | KY394678               | -             | -             |
| <i>Primulina eburnea west</i>                            | KY394879 | KY395277 | KY395471 | KY395671 | KY395871 | KY396072 | KY395079 | -        | -        | KY393474      | KY393674          | KY393875         | KY394076         | KY394277         | KY394478            | KY394679               | -             | -             |
| <i>Primulina fengkaiensis</i>                            | KY394881 | KY395279 | KY395473 | KY395673 | KY395873 | KY396074 | KY395081 | -        | -        | KY393475      | KY393676          | KY393877         | KY394078         | KY394279         | KY394480            | KY394681               | -             | -             |
| <i>Primulina fengshanensis</i>                           | KY394882 | KY395280 | KY395474 | KY395674 | KY395874 | KY396075 | KY395082 | -        | -        | KY393476      | KY393677          | KY393878         | KY394079         | KY394280         | KY394481            | KY394682               | -             | -             |
| <i>Primulina fimbrisepala</i>                            | KY394883 | KY395281 | KY395475 | MK746859 | KY395875 | KY396076 | MK746908 | MK746361 | MK746637 | KY393477      | KY393678          | KY393879         | MK775067         | MK746789         | MK746965            | MK747222               | MK747044      | MK765953      |
| <i>Primulina fimbrisepala</i> var. <i>mollis</i>         | KY394884 | KY395282 | KY395476 | KY395676 | KY395876 | KY396077 | KY395084 | -        | -        | KY393478      | KY393679          | KY393880         | KY394081         | KY394282         | KY394483            | KY394684               | -             | -             |
| <i>Primulina flavimaculata</i>                           | KY394885 | KY395283 | KY395477 | KY395677 | KY395877 | KY396078 | KY395085 | -        | -        | KY393479      | KY393680          | KY393881         | KY394082         | KY394283         | KY394484            | KY394685               | -             | -             |
| <i>Primulina floribunda</i>                              | KY394886 | KY395284 | KY395478 | KY395678 | KY395878 | KY396079 | KY395086 | -        | -        | KY393480      | KY393681          | KY393882         | KY394083         | KY394284         | KY394485            | KY394686               | -             | -             |

|                                                       |          |          |          |          |          |          |          |          |          |          |          |          |          |          |          |          |          |          |
|-------------------------------------------------------|----------|----------|----------|----------|----------|----------|----------|----------|----------|----------|----------|----------|----------|----------|----------|----------|----------|----------|
| <i>Primulina fordii</i>                               | MK747129 | -        | -        | MK746860 | MK764473 | MK746589 | MK746928 | MK746379 | MK746691 | MK746288 | MK746727 | MK779232 | MK775068 | MK746770 | MK746989 | MK747221 | MK747083 | MK765979 |
| <i>Primulina fordii</i> var. <i>dolichotricha</i>     | MK747125 | -        | -        | MK746861 | MK764470 | MK746592 | MK746930 | MK746378 | MK746688 | MK746247 | MK746728 | MK779233 | MK775069 | MK746775 | MK746990 | MK747220 | MK747085 | MK765980 |
| <i>Primulina gemella</i>                              | MK747146 | -        | -        | MK746862 | MK764495 | -        | MK746910 | MK746393 | MK746685 | MK746254 | MK746729 | MK779234 | MK775070 | MK746784 | MK746991 | MK747219 | MK747040 | MK765990 |
| <i>Primulina glabrescens</i>                          | MK747132 | -        | -        | MK746863 | MK764492 | MK746598 | -        | MK746388 | MK746672 | MK746278 | MK746730 | MK779235 | MK775071 | MK746797 | MK746992 | MK747218 | MK747091 | MK765949 |
| <i>Primulina glandacestriata</i>                      | MK747114 | -        | -        | MK746864 | -        | MK746587 | MK746960 | MK746383 | MK746657 | MK746256 | MK746731 | MK779236 | MK775072 | MK746777 | MK746993 | MK747217 | MK747076 | MK765977 |
| <i>Primulina glandulosa</i>                           | KY394887 | KY395285 | KY395479 | KY395679 | KY395879 | KY396080 | KY395087 | -        | -        | KY393481 | KY393682 | KY393883 | KY394084 | KY394285 | KY394486 | KY394687 | -        | -        |
| <i>Primulina glandulosa</i> var. <i>yangshuoensis</i> | KY394888 | KY395286 | KY395480 | KY395680 | KY395880 | KY396081 | KY395088 | -        | -        | KY393482 | KY393683 | KY393884 | KY394085 | KY394286 | KY394487 | KY394688 | -        | -        |
| <i>Primulina gongchengensis</i>                       | KY394889 | KY395287 | KY395481 | KY395681 | KY395881 | KY396082 | KY395089 | -        | -        | KY393483 | KY393684 | KY393885 | KY394086 | KY394287 | KY394488 | KY394689 | -        | -        |
| <i>Primulina grandibracteata</i>                      | MK747121 | -        | -        | MK746865 | MK764484 | MK746605 | MK746922 | MK746415 | MK746659 | MK746266 | MK746732 | MK779237 | MK775073 | MK746778 | MK746994 | MK747216 | MK747096 | MK765982 |
| <i>Primulina gueilinesis</i>                          | KY394967 | KY395288 | KY395559 | KY395758 | KY395882 | KY396083 | KY395090 | -        | -        | KY393561 | KY393685 | KY393886 | KY394087 | KY394288 | KY394566 | KY394690 | -        | -        |
| <i>Primulina guigangensis</i>                         | KY394892 | -        | KY395484 | KY395684 | KY395884 | KY396085 | KY395092 | -        | -        | KY393486 | KY393687 | KY393888 | KY394089 | KY394290 | KY394491 | KY394692 | -        | -        |
| <i>Primulina guihaiensis</i>                          | KY394893 | KY395290 | KY395485 | KY395685 | KY395885 | KY396086 | KY395093 | -        | -        | KY393487 | KY393688 | KY393889 | KY394090 | KY394291 | KY394492 | KY394693 | -        | -        |
| <i>Primulina guizhongensis</i>                        | KY394894 | -        | KY395486 | KY395686 | KY395886 | KY396087 | KY395094 | -        | -        | KY393488 | KY393689 | KY393890 | KY394091 | KY394292 | KY394493 | KY394694 | -        | -        |
| <i>Primulina halongensis</i>                          | MK747145 | KY395291 | KY395487 | MK746866 | KY395887 | MK746628 | MK746920 | MK746394 | MK746686 | MK746259 | KY393690 | MK779238 | MK775074 | MK746785 | MK746995 | MK747215 | MK747041 | MK765991 |
| <i>Primulina hedyotideae</i>                          | KY394897 | KY395293 | KY395489 | KY395688 | KY395889 | KY396090 | KY395097 | -        | -        | KY393491 | KY393692 | KY393893 | KY394094 | KY394295 | KY394496 | KY394697 | -        | -        |
| <i>Primulina heterochroa</i>                          | KY394898 | KY395294 | KY395490 | KY395689 | KY395890 | KY396091 | KY395098 | -        | -        | KY393492 | KY393693 | KY393894 | KY394095 | KY394296 | KY394497 | KY394698 | -        | -        |
| <i>Primulina heterotricha</i>                         | KY394899 | KY395295 | KY395491 | KY395690 | KY395891 | KY396092 | KY395099 | -        | -        | KY393493 | KY393694 | KY393895 | KY394096 | KY394297 | KY394498 | KY394699 | -        | -        |
| <i>Primulina hezhouensis</i>                          | MK747143 | -        | -        | MK746867 | MK764494 | MK746601 | MK746925 | MK746411 | MK746658 | MK746258 | MK746736 | MK779239 | MK775075 | MK746811 | MK746996 | MK747214 | -        | MK765952 |
| <i>Primulina hiepii</i>                               | MK747144 | -        | -        | MK746868 | MK764463 | MK746574 | MK746918 | MK746370 | MK746640 | MK746223 | MK746705 | MK779240 | MK775076 | MK746800 | MK746971 | MK747213 | MK747042 | MK765930 |
| <i>Primulina hochiensis</i>                           | KY394900 | KY395296 | KY395492 | KY395691 | KY395892 | KY396093 | KY395100 | -        | -        | KY393494 | KY393695 | KY393896 | KY394097 | KY394298 | KY394499 | KY394700 | -        | -        |
| <i>Primulina huaijiensis</i>                          | KY394901 | KY395297 | KY395493 | KY395692 | KY395893 | KY396094 | KY395101 | -        | -        | KY393495 | KY393696 | KY393897 | KY394098 | KY394299 | KY394500 | KY394701 | -        | -        |
| <i>Primulina huangii</i>                              | MK747138 | -        | -        | MK746869 | MK764467 | MK746567 | MK746912 | MK746367 | MK746647 | MK746231 | MK746703 | MK779241 | MK775077 | MK746818 | MK746975 | MK747212 | MK747035 | MK765927 |
| <i>Primulina hunanensis</i>                           | MK747152 | -        | -        | MK746870 | MK764505 | MK746611 | MK746959 | MK746408 | MK746656 | MK746270 | MK746738 | MK779242 | MK775078 | MK746826 | MK746998 | MK747211 | MK747094 | MK765960 |
| <i>Primulina jianghuaensis</i>                        | MK747102 | -        | -        | MK746871 | MK764472 | MK746583 | MK746934 | MK746377 | MK746648 | MK746271 | MK746739 | MK779243 | MK775079 | MK746774 | MK746999 | MK747210 | MK747079 | MK765975 |
| <i>Primulina jiangyongensis</i>                       | KY394902 | KY395298 | KY395494 | KY395693 | KY395894 | KY396095 | KY395102 | -        | -        | KY393496 | KY393697 | KY393898 | KY394099 | KY394300 | KY394501 | -        | -        | -        |
| <i>Primulina jingxiensis</i>                          | KY394903 | KY395299 | KY395495 | KY395694 | KY395895 | KY396096 | KY395103 | -        | -        | KY393497 | KY393698 | KY393899 | KY394100 | KY394301 | KY394502 | KY394702 | -        | -        |
| <i>Primulina jiuwanshanica</i>                        | MK747116 | -        | -        | MK746872 | MK764478 | MK746585 | MK746932 | MK746422 | MK746694 | MK746260 | MK746733 | MK779244 | MK775080 | MK746803 | MK747000 | MK747209 | MK747071 | MK765969 |
| <i>Primulina juliae</i>                               | KY394905 | KY395302 | KY395496 | MK746873 | KY395898 | KY396098 | KY395105 | MK746399 | MK746649 | KY393500 | KY393701 | KY393900 | KY394103 | MK746795 | KY394503 | KY394705 | MK747059 | MK765941 |
| <i>Primulina langshanica</i>                          | KY394907 | KY395303 | KY395499 | KY395698 | KY395899 | KY396100 | KY395107 | -        | -        | KY393501 | KY393702 | KY393903 | KY394104 | KY394305 | KY394506 | KY394706 | -        | -        |
| <i>Primulina latinervis</i>                           | KY394908 | KY395304 | KY395500 | KY395699 | KY395900 | KY396101 | KY395108 | -        | -        | KY393502 | KY393703 | KY393904 | KY394105 | KY394306 | KY394507 | KY394707 | -        | -        |
| <i>Primulina laxiflora</i>                            | KY394909 | KY395305 | KY395501 | KY395700 | KY395901 | KY396102 | KY395109 | -        | -        | KY393503 | KY393704 | KY393905 | KY394106 | KY394307 | KY394508 | KY394708 | -        | -        |
| <i>Primulina lechangensis</i>                         | KY394910 | KY395306 | KY395502 | KY395701 | KY395902 | KY396103 | KY395110 | -        | -        | KY393504 | KY393705 | KY393906 | KY394107 | KY394308 | KY394509 | KY394709 | -        | -        |
| <i>Primulina leei</i>                                 | KY394911 | KY395307 | KY395503 | KY395702 | KY395903 | KY396104 | KY395111 | -        | -        | KY393505 | KY393706 | KY393907 | KY394108 | KY394309 | KY394510 | KY394710 | -        | -        |
| <i>Primulina leiophylla</i>                           | KY394912 | KY395308 | KY395504 | KY395703 | KY395904 | KY396105 | KY395112 | -        | -        | KY393506 | KY393707 | KY393908 | KY394109 | KY394310 | KY394511 | KY394711 | -        | -        |
| <i>Primulina lepingensis</i>                          | KY394913 | KY395309 | KY395505 | KY395704 | KY395905 | KY396106 | KY395113 | -        | -        | KY393507 | KY393708 | KY393909 | KY394110 | KY394311 | KY394512 | KY394712 | -        | -        |
| <i>Primulina leprosa</i>                              | KY394914 | KY395310 | KY395506 | KY395705 | KY395906 | KY396107 | KY395114 | -        | -        | KY393508 | KY393709 | KY393910 | KY394111 | KY394312 | KY394513 | KY394713 | -        | -        |
| <i>Primulina liboensis</i>                            | KY394917 | KY395311 | KY395509 | KY395708 | KY395909 | KY396110 | KY395117 | -        | -        | KY393511 | KY393712 | KY393913 | KY394114 | KY394315 | KY394516 | KY394716 | -        | -        |
| <i>Primulina liguliformis</i>                         | KY394918 | KY395312 | KY395510 | KY395709 | KY395910 | KY396111 | KY395118 | -        | -        | KY393512 | KY393713 | KY393914 | KY394115 | KY394316 | KY394517 | KY394717 | -        | -        |
| <i>Primulina lijiangensis</i>                         | KY394919 | KY395313 | KY395511 | KY395710 | KY395911 | KY396112 | KY395119 | -        | -        | KY393513 | KY393714 | KY393915 | KY394116 | KY394317 | KY394518 | KY394718 | -        | -        |
| <i>Primulina linearicalyx</i>                         | KY394920 | KY395314 | KY395512 | KY395711 | KY395912 | KY396113 | KY395120 | -        | -        | KY393514 | KY393715 | KY393916 | KY394117 | KY394318 | KY394519 | KY394719 | -        | -        |
| <i>Primulina linearifolia</i>                         | KY394921 | KY395315 | KY395513 | KY395712 | KY395913 | KY396114 | KY395121 | -        | -        | KY393515 | KY393716 | KY393917 | KY394118 | KY394319 | KY394520 | KY394720 | -        | -        |
| <i>Primulina lingchuanensis</i>                       | KY394922 | KY395316 | KY395514 | KY395713 | KY395914 | KY396115 | -        | -        | -        | KY393516 | KY393717 | KY393918 | KY394119 | KY394320 | KY394521 | KY394721 | -        | -        |
| <i>Primulina linglingensis</i>                        | KY394923 | KY395317 | KY395515 | KY395714 | KY395915 | KY396116 | KY395122 | -        | -        | KY393517 | KY393718 | KY393919 | KY394120 | KY394321 | KY394522 | KY394722 | -        | -        |
| <i>Primulina linglingensis</i> var. <i>fragrans</i>   | MK747157 | -        | -        | MK746874 | MK764506 | -        | MK746950 | MK746413 | MK746670 | MK746285 | MK746742 | MK779246 | MK775082 | MK746807 | MK747003 | MK747207 | MK747051 | MK765943 |
| <i>Primulina liujiangensis</i>                        | KY394924 | KY395318 | KY395516 | KY395715 | KY395916 | KY396117 | KY395123 | -        | -        | KY393518 | KY393719 | KY393920 | KY394121 | KY394322 | KY394523 | KY394723 | -        | -        |

|                                                        |          |          |          |          |          |          |          |          |          |          |          |          |          |          |          |          |          |          |
|--------------------------------------------------------|----------|----------|----------|----------|----------|----------|----------|----------|----------|----------|----------|----------|----------|----------|----------|----------|----------|----------|
| <i>Primulina lobulata</i>                              | KY394925 | KY395319 | KY395517 | KY395716 | KY395917 | KY396118 | KY395124 | -        | -        | KY393519 | KY393720 | KY393921 | KY394122 | KY394323 | KY394524 | KY394724 | -        | -        |
| <i>Primulina longgangensis</i>                         | KY394926 | KY395320 | KY395518 | KY395717 | KY395918 | KY396119 | KY395125 | -        | -        | KY393520 | KY393721 | KY393922 | KY394123 | KY394324 | KY394525 | KY394725 | -        | -        |
| <i>Primulina longicalyx</i>                            | KY394927 | KY395321 | KY395519 | KY395718 | KY395919 | KY396120 | KY395126 | -        | -        | KY393521 | KY393722 | KY393923 | KY394124 | KY394325 | KY394526 | KY394726 | -        | -        |
| <i>Primulina longii</i>                                | KY394928 | KY395322 | KY395520 | KY395719 | KY395920 | KY396121 | KY395127 | -        | -        | KY393522 | KY393723 | KY393924 | KY394125 | KY394326 | KY394527 | KY394727 | -        | -        |
| <i>Primulina longzhouensis</i>                         | MK747139 | -        | -        | MK746876 | MK764480 | MK746594 | MK746940 | MK746385 | MK746665 | MK746262 | MK746744 | MK779248 | MK775084 | MK746828 | MK747005 | MK747205 | MK747043 | MK765936 |
| <i>Primulina lunglinensis</i>                          | KY394930 | KY395324 | KY395522 | MK746877 | KY395922 | KY396123 | KY395129 | -        | -        | KY393524 | KY393725 | KY393926 | KY394127 | KY394328 | KY394529 | KY394729 | -        | -        |
| <i>Primulina lunglinensis</i> var. <i>amblyosepala</i> | MK747105 | -        | -        | KY395721 | MK764451 | MK746570 | MK746926 | MK746381 | MK746695 | -        | MK746745 | MK779249 | MK775085 | MK746782 | MK747006 | MK747203 | MK747075 | MK765973 |
| <i>Primulina lungzhouensis</i>                         | KY394931 | KY395325 | KY395523 | KY395722 | KY395923 | KY396124 | KY395130 | -        | -        | KY393525 | KY393726 | KY393927 | KY394128 | KY394329 | KY394530 | KY394730 | -        | -        |
| <i>Primulina luochengensis</i>                         | KY394932 | KY395326 | KY395524 | KY395723 | KY395924 | KY396125 | KY395131 | -        | -        | KY393526 | KY393727 | KY393928 | KY394129 | KY394330 | KY394531 | KY394731 | -        | -        |
| <i>Primulina lutea</i>                                 | KY394934 | KY395328 | KY395526 | KY395725 | KY395926 | KY396127 | KY395133 | -        | -        | KY393528 | KY393729 | KY393930 | KY394131 | KY394332 | KY394533 | KY394733 | -        | -        |
| <i>Primulina lutescens</i>                             | MK747135 | -        | -        | MK746878 | MK764487 | MK746607 | MK746943 | MK746397 | MK746673 | MK746263 | MK746751 | MK779250 | MK775086 | MK746798 | MK747012 | MK747202 | MK747087 | MK765989 |
| <i>Primulina lutvittata</i>                            | KY394935 | KY395329 | KY395527 | KY395726 | KY395927 | KY396128 | KY395134 | -        | -        | KY393529 | KY393730 | KY393931 | KY394132 | KY394333 | KY394534 | KY394734 | -        | -        |
| <i>Primulina luzhaiensis</i>                           | KY394936 | KY395330 | KY395528 | KY395727 | KY395928 | KY396129 | KY395135 | -        | -        | KY393530 | KY393731 | KY393932 | KY394133 | KY394334 | KY394535 | KY394735 | -        | -        |
| <i>Primulina mabaensis</i>                             | KY394937 | KY395331 | KY395529 | KY395728 | KY395929 | KY396130 | KY395136 | -        | -        | KY393531 | KY393732 | KY393933 | KY394134 | KY394335 | KY394536 | KY394736 | -        | -        |
| <i>Primulina macrodonta</i>                            | KY394938 | KY395332 | KY395530 | KY395729 | KY395930 | KY396131 | KY395137 | -        | -        | KY393532 | KY393733 | KY393934 | KY394135 | KY394336 | KY394537 | KY394737 | -        | -        |
| <i>Primulina macrorhiza</i>                            | KY394939 | KY395333 | KY395531 | KY395730 | KY395931 | KY396132 | KY395138 | -        | -        | KY393533 | KY393734 | KY393935 | KY394136 | KY394337 | KY394538 | KY394738 | -        | -        |
| <i>Primulina maculata</i>                              | MK747126 | -        | -        | MK746879 | MK764491 | MK746610 | -        | MK746420 | MK746682 | MK746243 | MK746746 | MK779251 | MK775087 | MK746810 | MK747007 | MK747200 | MK747097 | MK765946 |
| <i>Primulina maguanensis</i>                           | MK747127 | -        | -        | MK746880 | -        | MK746603 | MK746924 | -        | MK746653 | MK746267 | MK746747 | MK779252 | MK775088 | MK746779 | MK747008 | MK747199 | MK747072 | MK765971 |
| <i>Primulina malipoensis</i>                           | MK747123 | -        | -        | MK746881 | MK764489 | MK746606 | MK746923 | MK746414 | MK746650 | MK746240 | MK746769 | MK779253 | MK775089 | MK746794 | MK747030 | MK747198 | MK747070 | MK765968 |
| <i>Primulina medica</i>                                | KY394940 | KY395334 | KY395532 | KY395731 | KY395932 | KY396133 | KY395139 | -        | -        | KY393534 | KY393735 | KY393936 | KY394137 | KY394338 | KY394539 | KY394739 | -        | -        |
| <i>Primulina melanofilamenta</i>                       | MK747158 | -        | -        | MK746882 | MK764507 | MK746626 | MK746948 | MK746405 | MK746678 | MK746277 | MK746748 | MK779254 | MK775090 | MK746825 | MK747009 | MK747197 | MK747055 | MK765939 |
| <i>Primulina minor</i>                                 | MK747160 | -        | -        | MK746883 | MK764509 | MK746623 | -        | MK746427 | MK746652 | MK746290 | MK746749 | MK779255 | MK775091 | MK746790 | MK747010 | MK747196 | MK747058 | MK765987 |
| <i>Primulina minutimaculata</i>                        | KY394941 | KY395335 | KY395533 | KY395732 | KY395933 | KY396134 | KY395140 | -        | -        | KY393535 | KY393736 | KY393937 | KY394138 | KY394339 | KY394540 | KY394740 | -        | -        |
| <i>Primulina moi</i>                                   | KY394942 | KY395336 | KY395534 | KY395733 | KY395934 | KY396135 | KY395141 | -        | -        | KY393536 | KY393737 | KY393938 | KY394139 | KY394340 | KY394541 | KY394741 | -        | -        |
| <i>Primulina mollifolia</i>                            | KY394944 | KY395337 | KY395536 | KY395735 | KY395936 | KY396136 | KY395143 | -        | -        | KY393538 | KY393739 | KY393940 | KY394141 | KY394342 | KY394543 | KY394743 | -        | -        |
| <i>Primulina nandanensis</i>                           | KY394947 | KY395340 | KY395539 | KY395738 | KY395939 | KY396139 | KY395146 | -        | -        | KY393541 | KY393742 | KY393943 | KY394144 | KY394345 | KY394546 | KY394746 | -        | -        |
| <i>Primulina napoensis</i>                             | MK747168 | KY395341 | KY395540 | MK746884 | MK764462 | MK746579 | MK746917 | MK746372 | MK746643 | MK746227 | MK746709 | MK779256 | MK775092 | MK746834 | MK746977 | MK747195 | MK747039 | MK765929 |
| <i>Primulina ningmingensis</i>                         | KY394949 | KY395342 | KY395541 | KY395740 | KY395941 | KY396141 | KY395148 | -        | -        | KY393543 | KY393744 | KY393945 | KY394146 | KY394347 | KY394548 | KY394748 | -        | -        |
| <i>Primulina obtusidentata</i>                         | KY394950 | KY395343 | KY395542 | KY395741 | KY395942 | KY396142 | KY395149 | -        | -        | KY393544 | KY393745 | KY393946 | KY394147 | KY394348 | KY394549 | KY394749 | -        | -        |
| <i>Primulina ophiopogoides</i>                         | KY394951 | KY395344 | KY395543 | KY395742 | KY395943 | KY396143 | KY395150 | -        | -        | KY393545 | KY393746 | KY393947 | KY394148 | KY394349 | KY394550 | KY394750 | -        | -        |
| <i>Primulina orthandra</i>                             | MK747128 | -        | -        | MK746885 | MK764475 | MK746593 | MK746936 | MK746382 | MK746692 | MK746286 | MK746750 | MK779257 | MK775093 | MK746799 | MK747011 | MK747194 | MK747080 | MK765983 |
| <i>Primulina parvifolia</i>                            | KY394952 | KY395345 | KY395544 | KY395743 | KY395944 | KY396144 | KY395151 | -        | -        | KY393546 | KY393747 | KY393948 | KY394149 | KY394350 | KY394551 | KY394751 | -        | -        |
| <i>Primulina pengii</i>                                | MK747154 | -        | -        | MK746886 | MK764504 | MK746615 | MK746919 | MK746407 | MK746681 | MK746250 | MK746752 | MK779258 | MK775094 | MK746821 | MK747013 | MK747193 | MK747060 | MK765925 |
| <i>Primulina petrocosomeoides</i>                      | KY394953 | KY395346 | KY395545 | KY395744 | KY395945 | KY396145 | KY395152 | -        | -        | KY393547 | KY393748 | KY393949 | KY394150 | KY394351 | KY394552 | KY394752 | -        | -        |
| <i>Primulina pinnata</i>                               | MK747115 | -        | -        | MK746887 | MK764477 | MK746586 | MK746933 | MK746423 | MK746689 | MK746249 | MK746753 | MK779259 | MK775095 | MK746781 | MK747014 | MK747190 | MK747069 | MK765972 |
| <i>Primulina pinnatifida</i>                           | KY394954 | KY395347 | KY395546 | KY395745 | KY395946 | KY396146 | KY395153 | -        | -        | KY393548 | KY393749 | KY393950 | KY394151 | KY394352 | KY394553 | KY394753 | -        | -        |
| <i>Primulina polycephala</i>                           | KY394956 | KY395349 | KY395548 | KY395747 | KY395948 | KY396148 | KY395155 | -        | -        | KY393550 | KY393751 | KY393952 | KY394153 | KY394354 | KY394555 | KY394755 | -        | -        |
| <i>Primulina porphyrea</i>                             | KY394957 | KY395350 | KY395549 | KY395748 | KY395949 | KY396149 | KY395156 | -        | -        | KY393551 | KY393752 | KY393953 | KY394154 | KY394355 | KY394556 | KY394756 | -        | -        |
| <i>Primulina pseudoeburnea</i>                         | KY394958 | KY395351 | KY395550 | KY395749 | KY395950 | KY396150 | KY395157 | -        | -        | KY393552 | KY393753 | KY393954 | KY394155 | KY394356 | KY394557 | KY394757 | -        | -        |
| <i>Primulina pseudoheterotricha</i>                    | MK747117 | -        | -        | MK746888 | MK764493 | MK746600 | -        | MK746395 | MK746674 | MK746291 | MK746755 | MK779260 | MK775096 | -        | MK747016 | MK747189 | -        | MK765947 |
| <i>Primulina pseudolinearifolia</i>                    | MK747140 | -        | -        | MK746889 | MK764481 | MK746595 | MK746939 | MK746380 | MK746677 | -        | MK746756 | MK779261 | MK775097 | -        | MK747017 | MK747188 | MK747065 | MK765962 |
| <i>Primulina pseudomollifolia</i>                      | MK747134 | -        | -        | MK746890 | MK764488 | MK746602 | -        | MK746389 | MK746680 | MK746244 | MK746757 | MK779262 | MK775098 | MK746816 | MK747018 | MK747187 | MK747093 | MK765950 |
| <i>Primulina pseudoroscoalba</i>                       | KY394959 | KY395352 | KY395551 | KY395750 | KY395951 | KY396151 | KY395158 | -        | -        | KY393553 | KY393754 | KY393955 | KY394156 | KY394357 | KY394558 | KY394758 | -        | -        |
| <i>Primulina pteropoda</i>                             | KY394960 | KY395353 | KY395552 | KY395751 | KY395952 | KY396152 | KY395159 | -        | -        | KY393554 | KY393755 | KY393956 | KY394157 | KY394358 | KY394559 | KY394759 | -        | -        |
| <i>Primulina pulchurifolia</i>                         | KY394961 | KY395354 | KY395553 | KY395752 | KY395953 | KY396153 | KY395160 | -        | -        | KY393555 | KY393756 | KY393957 | KY394158 | KY394359 | KY394560 | KY394760 | -        | -        |

|                                                     |          |          |          |          |          |          |          |          |          |          |          |          |          |          |          |          |          |          |
|-----------------------------------------------------|----------|----------|----------|----------|----------|----------|----------|----------|----------|----------|----------|----------|----------|----------|----------|----------|----------|----------|
| <i>Primulina pungentisepala</i>                     | KY394962 | KY395355 | KY395554 | KY395753 | KY395954 | KY396154 | KY395161 | -        | -        | KY393556 | KY393757 | KY393958 | KY394159 | KY394360 | KY394561 | KY394761 | -        | -        |
| <i>Primulina purpurea</i>                           | KY394963 | KY395356 | KY395555 | KY395754 | KY395955 | KY396155 | KY395162 | -        | -        | KY393557 | KY393758 | KY393959 | KY394160 | KY394361 | KY394562 | KY394762 | -        | -        |
| <i>Primulina qingyuanensis</i>                      | KY394965 | KY395358 | KY395557 | KY395756 | KY395957 | KY396157 | KY395164 | -        | -        | KY393559 | KY393760 | KY393961 | KY394162 | KY394363 | KY394564 | KY394764 | -        | -        |
| <i>Primulina renifolia</i>                          | KY394966 | KY395359 | KY395558 | KY395757 | KY395958 | KY396158 | KY395165 | -        | -        | KY393560 | KY393761 | KY393962 | KY394163 | KY394364 | KY394565 | KY394765 | -        | -        |
| <i>Primulina repanda</i>                            | KY394968 | KY395361 | KY395560 | KY395759 | KY395960 | KY396160 | KY395167 | -        | -        | KY393562 | KY393763 | KY393964 | KY394165 | KY394366 | KY394567 | KY394767 | -        | -        |
| <i>Primulina ronganensis</i>                        | KY394970 | KY395363 | KY395562 | KY395761 | KY395962 | KY396162 | KY395169 | -        | -        | KY393564 | KY393765 | KY393966 | KY394167 | KY394368 | KY394569 | KY394769 | -        | -        |
| <i>Primulina rongshuiensis</i>                      | KY394971 | KY395364 | KY395563 | KY395762 | KY395963 | KY396163 | KY395170 | -        | -        | KY393565 | KY393766 | KY393967 | KY394168 | KY394369 | KY394570 | KY394770 | -        | -        |
| <i>Primulina roseoalba</i>                          | KY394972 | KY395365 | KY395564 | KY395763 | KY395964 | KY396164 | KY395171 | -        | -        | KY393566 | KY393767 | KY393968 | KY394169 | KY394370 | KY394571 | KY394771 | -        | -        |
| <i>Primulina rosulata</i>                           | MH343970 | MH342849 | MH342975 | MH343096 | MH343223 | -        | -        | MH343603 | MH343857 | MH344611 | MH344675 | MH342727 | MH344235 | MH344358 | MH344109 | MH344863 | -        | -        |
| <i>Primulina rotundifolia</i>                       | KY394975 | KY395368 | KY395567 | KY395766 | KY395967 | KY396167 | KY395174 | -        | -        | KY393569 | KY393770 | KY393971 | KY394172 | KY394373 | KY394574 | KY394774 | -        | -        |
| <i>Primulina rubella</i>                            | KY394976 | KY395369 | KY395568 | KY395767 | KY395968 | KY396168 | KY395175 | -        | -        | KY393570 | KY393771 | KY393972 | KY394173 | KY394374 | KY394575 | KY394775 | -        | -        |
| <i>Primulina rubribracteata</i>                     | KY394977 | KY395370 | KY395569 | KY395768 | KY395969 | KY396169 | KY395176 | -        | -        | KY393571 | KY393772 | KY393973 | KY394174 | KY394375 | KY394576 | KY394776 | -        | -        |
| <i>Primulina sclerophylla</i>                       | KY394979 | KY395372 | KY395571 | KY395770 | KY395971 | KY396171 | KY395178 | -        | -        | KY393573 | KY393774 | KY393975 | KY394176 | KY394377 | KY394578 | KY394778 | -        | -        |
| <i>Primulina secundiflora</i>                       | MK747119 | -        | -        | MK746891 | MK764510 | MK746604 | MK746921 | -        | MK746675 | -        | MK746758 | MK779263 | MK775099 | MK746780 | MK747019 | MK747186 | MK747074 | MK765970 |
| <i>Primulina shouchengensis</i>                     | KY394980 | KY395373 | KY395572 | KY395771 | KY395972 | KY396172 | KY395179 | -        | -        | KY393574 | KY393775 | KY393976 | KY394177 | KY394378 | KY394579 | KY394779 | -        | -        |
| <i>Primulina sichuanensis</i>                       | MK747162 | -        | -        | MK746892 | MK764500 | MK746624 | MK746949 | MK746404 | MK746662 | MK746264 | MK746759 | MK779264 | MK775100 | MK746822 | MK747020 | MK747185 | MK747053 | MK765986 |
| <i>Primulina sinovietnamica</i>                     | KY394981 | KY395374 | KY395573 | KY395772 | KY395973 | KY396173 | KY395180 | -        | -        | KY393575 | KY393776 | KY393977 | KY394178 | KY394379 | KY394580 | KY394780 | -        | -        |
| <i>Primulina spadiceiformis</i>                     | MK747136 | -        | -        | MK746897 | MK764490 | MK746609 | MK746944 | MK746392 | MK746679 | MK746283 | MK746760 | MK779269 | MK775105 | MK746819 | MK747021 | MK747180 | -        | MK765948 |
| <i>Primulina spinulosa</i>                          | KY395017 | KY395409 | KY395608 | KY395808 | KY396009 | KY396207 | KY395214 | -        | -        | KY393576 | KY393812 | KY394013 | KY394214 | KY394415 | KY394616 | KY394816 | -        | -        |
| <i>Primulina subrhomboidea</i>                      | KY395018 | KY395410 | KY395609 | KY395809 | KY396010 | KY396208 | KY395215 | -        | -        | KY393577 | KY393813 | KY394014 | KY394215 | KY394416 | KY394617 | KY394817 | -        | -        |
| <i>Primulina subulata</i>                           | KY395020 | KY395412 | KY395611 | KY395811 | KY396012 | KY396210 | KY395217 | -        | -        | KY393579 | KY393815 | KY394016 | KY394217 | KY394418 | KY394619 | KY394819 | -        | -        |
| <i>Primulina subulata</i> var. <i>yangchunensis</i> | MK747120 | -        | -        | MK746898 | MK764479 | MK746590 | MK746945 | -        | MK746654 | MK746276 | MK746767 | MK779270 | MK775106 | MK746771 | MK747028 | MK747179 | MK747081 | MK765978 |
| <i>Primulina subulatisepala</i>                     | MK747122 | -        | -        | MK746899 | MK764468 | MK746591 | MK746929 | MK746421 | MK746687 | MK746246 | MK746761 | MK779271 | MK775107 | MK746776 | MK747022 | MK747178 | MK747073 | MK765967 |
| <i>Primulina suichuanensis</i>                      | MK747153 | -        | -        | MK746900 | MK764513 | MK746614 | MK746927 | MK746409 | MK746661 | MK746261 | MK746762 | MK779272 | -        | MK746824 | MK747023 | MK747177 | MK747062 | MK765961 |
| <i>Primulina swinglei</i>                           | KY395022 | KY395414 | KY395613 | KY395813 | KY396014 | KY396212 | KY395219 | -        | -        | KY393581 | KY393817 | KY394018 | KY394219 | KY394420 | KY394621 | KY394821 | -        | -        |
| <i>Primulina tabacum</i>                            | KY395023 | KY395415 | KY395614 | KY395814 | KY396015 | KY396213 | KY395220 | -        | -        | KY393582 | KY393818 | KY394019 | KY394220 | KY394421 | KY394622 | KY394822 | -        | -        |
| <i>Primulina tenuifolia</i>                         | KY395024 | KY395416 | KY395615 | KY395815 | KY396016 | KY396214 | KY395221 | -        | -        | KY393583 | KY393819 | KY394020 | KY394221 | KY394422 | KY394623 | KY394823 | -        | -        |
| <i>Primulina tenuituba</i>                          | KY395025 | KY395417 | KY395616 | KY395816 | KY396017 | KY396215 | KY395222 | -        | -        | KY393584 | KY393820 | KY394021 | KY394222 | KY394423 | KY394624 | KY394824 | -        | -        |
| <i>Primulina tiandengensis</i>                      | KY395027 | KY395419 | KY395618 | KY395818 | KY396019 | KY396217 | KY395224 | -        | -        | KY393586 | KY393822 | KY394023 | KY394224 | KY394425 | KY394626 | KY394826 | -        | -        |
| <i>Primulina tribracteata</i>                       | KY395019 | KY395411 | KY395619 | KY395810 | KY396020 | KY396209 | KY395216 | -        | -        | KY393578 | KY393814 | KY394024 | KY394225 | KY394417 | KY394618 | KY394827 | -        | -        |
| <i>Primulina tsoongii</i>                           | KY395029 | KY395421 | KY395620 | KY395820 | KY396021 | KY396219 | KY395226 | -        | -        | KY393588 | KY393824 | KY394025 | KY394226 | KY394427 | KY394628 | KY394828 | -        | -        |
| <i>Primulina varicolor</i>                          | KY395030 | KY395422 | KY395621 | KY395821 | KY396022 | KY396220 | KY395227 | -        | -        | KY393589 | KY393825 | KY394026 | KY394227 | KY394428 | KY394629 | KY394829 | -        | -        |
| <i>Primulina verecunda</i>                          | KY395031 | KY395423 | KY395622 | KY395822 | KY396023 | KY396221 | KY395228 | -        | -        | KY393590 | KY393826 | KY394027 | KY394228 | KY394429 | KY394630 | KY394830 | -        | -        |
| <i>Primulina versicolor</i>                         | MK747155 | -        | -        | MK746901 | MK764514 | MK746613 | -        | MK746406 | MK746655 | MK746252 | MK746763 | MK779273 | MK775108 | MK746820 | MK747024 | MK747176 | MK747061 | MK765964 |
| <i>Primulina vestita</i>                            | MK747156 | -        | -        | MK746902 | MK764511 | -        | MK746941 | MK746400 | MK746666 | MK746282 | MK746764 | MK779274 | MK775109 | MK746809 | MK747025 | MK747175 | MK747052 | MK765942 |
| <i>Primulina villosissima</i>                       | KY395032 | KY395424 | KY395623 | KY395823 | KY396024 | KY396222 | KY395229 | -        | -        | KY393591 | KY393827 | KY394028 | KY394229 | KY394430 | KY394631 | KY394831 | -        | -        |
| <i>Primulina wenii</i>                              | MK747148 | -        | -        | MK746903 | MK764508 | MK746629 | MK746958 | MK746398 | MK746684 | MK746284 | MK746765 | MK779275 | MK775110 | MK746817 | MK747026 | MK747174 | MK747054 | MK765938 |
| <i>Primulina wentsaii</i>                           | KY395033 | KY395425 | KY395624 | KY395824 | KY396025 | KY396223 | KY395230 | -        | -        | KY393592 | KY393828 | KY394029 | KY394230 | KY394431 | KY394632 | KY394832 | -        | -        |
| <i>Primulina wuae</i>                               | MK747159 | -        | -        | MK746904 | MK764515 | MK746618 | MK746947 | MK746403 | MK746663 | MK746265 | MK746766 | MK779276 | MK775111 | MK746808 | MK747027 | MK747173 | MK747095 | MK765937 |
| <i>Primulina xinningensis</i>                       | KY395035 | KY395427 | KY395626 | KY395826 | KY396027 | KY396225 | KY395232 | -        | -        | KY393594 | KY393830 | KY394031 | KY394232 | KY394433 | KY394634 | KY394834 | -        | -        |
| <i>Primulina xiuningensis</i>                       | MK747150 | -        | -        | MK746905 | MK764497 | MK746612 | MK746957 | MK746401 | -        | MK746241 | MK746740 | MK779277 | MK775112 | MK746804 | MK747001 | MK747172 | MK747063 | MK765940 |
| <i>Primulina xiziae</i>                             | KY395038 | KY395430 | KY395629 | KY395829 | KY396030 | -        | KY395235 | -        | -        | KY393597 | KY393833 | KY394034 | KY394235 | KY394436 | KY394637 | KY394837 | -        | -        |
| <i>Primulina yangchunensis</i>                      | KY395039 | KY395431 | KY395630 | KY395830 | KY396031 | -        | KY395236 | -        | -        | KY393598 | KY393834 | KY394035 | KY394236 | KY394437 | KY394638 | KY394838 | -        | -        |
| <i>Primulina yangshanensis</i>                      | KY395040 | KY395432 | KY395631 | KY395831 | KY396032 | -        | KY395237 | -        | -        | KY393599 | KY393835 | KY394036 | KY394237 | KY394438 | KY394639 | KY394839 | -        | -        |
| <i>Primulina yangshuoensis</i>                      | KY395042 | KY395434 | KY395633 | KY395833 | KY396034 | -        | KY395239 | -        | -        | KY393601 | KY393837 | KY394038 | KY394239 | KY394440 | KY394641 | KY394841 | -        | -        |
| <i>Primulina yingdeensis</i>                        | KY395043 | KY395435 | KY395634 | KY395834 | KY396035 | -        | KY395240 | -        | -        | KY393602 | KY393838 | KY394039 | KY394240 | KY394441 | KY394642 | KY394842 | -        | -        |

|                               |          |          |          |          |          |          |          |          |          |          |          |          |          |          |          |          |          |          |
|-------------------------------|----------|----------|----------|----------|----------|----------|----------|----------|----------|----------|----------|----------|----------|----------|----------|----------|----------|----------|
| <i>Primulina yungfuensis</i>  | KY395045 | KY395437 | KY395636 | KY395836 | KY396037 | -        | KY395242 | -        | -        | KY393604 | KY393840 | KY394041 | KY394242 | KY394443 | KY394644 | KY394844 | -        | -        |
| <i>Primulina zhoui</i>        | MK747104 | -        | -        | MK746906 | MK764464 | MK746569 | MK746913 | MK746368 | MK746639 | MK746222 | MK746700 | MK779278 | MK775113 | -        | MK746962 | MK747171 | MK747031 | MK765926 |
| <i>Anna ophiorrhizoides</i>   | MK747107 | -        | -        | MK746837 | MK764454 | -        | -        | MK746360 | MK746632 | MK746233 | MK746720 | MK779209 | MK775047 | MK746787 | MK746964 | MK747240 | MK747045 | MK765954 |
| <i>Briggsiopsis delavayi</i>  | MK747106 | -        | -        | MK746838 | MK764453 | MK746571 | MK746907 | MK746359 | MK746631 | MK746235 | MK746725 | MK779210 | MK775048 | MK746788 | MK746963 | MK747235 | MK747046 | MK765955 |
| <i>Deinostigma poilanei</i>   | MK747169 | -        | -        | MK746839 | MK764517 | MK746630 | -        | MK746426 | MK746699 | MK746273 | MK746754 | MK779211 | MK775049 | MK746836 | MK747015 | MK747224 | MK747100 | MK765924 |
| <i>Loxostigma kurzii</i>      | MK747109 | -        | -        | MK746840 | MK764456 | MK746573 | -        | MK746363 | MK746634 | MK746234 | MK746722 | MK779212 | -        | MK746786 | MK746967 | MK747204 | MK747049 | MK765958 |
| <i>Lysionotus pauciflorus</i> | MK747108 | -        | -        | MK746841 | MK764455 | -        | -        | MK746362 | MK746633 | MK746232 | MK746721 | MK779213 | MK775050 | MK746791 | MK746966 | MK747201 | MK747050 | MK765959 |
| <i>Petrocosmea flaccida</i>   | MK747110 | -        | -        | MK746842 | MK764457 | -        | -        | MK746364 | MK746635 | MK746237 | MK746724 | MK779214 | MK775051 | MK746792 | MK746968 | MK747192 | MK747047 | MK765956 |
| <i>Petrocosmea sinensis</i>   | MK747111 | -        | -        | MK746843 | MK764458 | -        | MK746909 | MK746365 | MK746636 | MK746238 | MK746723 | MK779215 | MK775052 | MK746793 | MK746969 | MK747191 | MK747048 | MK765957 |
| <i>Petrocodon dealbatus</i>   | KY394845 | KY395243 | KY395438 | KY395637 | KY395837 | KY396038 | KY395046 | -        | -        | KY393439 | KY393640 | KY393841 | KY394042 | KY394243 | KY394444 | KY394645 | -        | -        |
| <i>Petrocodon hancei</i>      | KY394846 | KY395244 | KY395439 | KY395638 | KY395838 | KY396039 | KY395047 | -        | -        | KY393440 | KY393641 | KY393842 | KY394043 | KY394244 | KY394445 | KY394646 | -        | -        |

411 *Petrocodon* (Gesneriaceae)

| Species                                                 | ITS      | <i>trnL-F</i> |
|---------------------------------------------------------|----------|---------------|
| <i>Petrocodon ainsliifolius</i>                         | KF202291 | KF202298      |
| <i>Petrocodon asterocalyx</i>                           | KC904954 | KC904957      |
| <i>Petrocodon coccineus</i>                             | KF202292 | KF202299      |
| <i>Petrocodon coriaceifolius</i>                        | HQ633040 | HQ632943      |
| <i>Petrocodon dealbatus</i>                             | KY394845 | KY393439      |
| <i>Petrocodon dealbatus</i> var.<br><i>denticulatus</i> | JF697578 | -             |
| <i>Petrocodon ferrugineus</i>                           | HQ633043 | HQ632946      |
| <i>Petrocodon hancei</i>                                | KY394846 | KY393440      |
| <i>Petrocodon hechiensis</i>                            | KR337018 | KR476563      |
| <i>Petrocodon hispidus</i>                              | KF202293 | KF202300      |
| <i>Petrocodon integrifolius</i>                         | HQ633037 | HQ632940      |
| <i>Petrocodon lithophilus</i>                           | KF202296 | KF202303      |
| <i>Petrocodon lui</i>                                   | HQ633035 | HQ632938      |
| <i>Petrocodon multiflorus</i>                           | KJ475411 | KM232660      |
| <i>Petrocodon nivelolanosus</i>                         | JF697576 | JF697588      |
| <i>Petrocodon pulchriflorus</i>                         | KX579058 | KX579059      |
| <i>Petrocodon retroflexus</i>                           | KX579060 | KX579061      |
| <i>Petrocodon scopulorum</i>                            | GU350637 | GU350669      |
| <i>Petrocodon tiandengensis</i>                         | JX506960 | JX506850      |
| <i>Petrocodon tongziensis</i>                           | MF872617 | MF872618      |
| <i>Petrocodon viridescens</i>                           | KF202297 | KF202304      |
| <i>Anna ophiorrhizoides</i>                             | MK747107 | MK746233      |
| <i>Briggsiopsis delavayi</i>                            | MK747106 | MK746235      |
| <i>Deinostigma poilanei</i>                             | MK747169 | MK746273      |
| <i>Loxostigma kurzii</i>                                | MK747109 | MK746234      |
| <i>Lysionotus pauciflorus</i>                           | MK747108 | MK746232      |
| <i>Petrocosmea flaccida</i>                             | MK747110 | MK746237      |
| <i>Petrocosmea sinensis</i>                             | MK747111 | MK746238      |
| <i>Primulina danxiaensis</i>                            | KY394867 | KY393460      |
| <i>Primulina dryas</i>                                  | KY394875 | KY393469      |
| <i>Primulina purpurea</i>                               | KY394963 | KY393557      |

| Species                                              | ITS      | <i>matK</i> | <i>rpS16</i> | <i>trnL-F</i> | <i>trnT-L</i> |
|------------------------------------------------------|----------|-------------|--------------|---------------|---------------|
| <i>Petrocosmea barbata</i>                           | KR006475 | KR006438    | KR006491     | KR006351      | KR006424      |
| <i>Petrocosmea begoniifolia</i>                      | KR006482 | JX142175    | KR006494     | JX142178      | KR006431      |
| <i>Petrocosmea cavaleriei</i>                        | KR006476 | KR006440    | KR006487     | KR006372      | KR006420      |
| <i>Petrocosmea coerulea</i>                          | KR006483 | KR006457    | KR006492     | KR006355      | KR006427      |
| <i>Petrocosmea confluens</i>                         | KR006466 | -           | -            | -             | -             |
| <i>Petrocosmea duclouxii</i>                         | KR006478 | KR006458    | KR006498     | KR006360      | KR006433      |
| <i>Petrocosmea flaccida</i>                          | KR006471 | KR006443    | KR006517     | KR006363      | KR006414      |
| <i>Petrocosmea forrestii</i>                         | KR006464 | KR006445    | KR006520     | KR006365      | KR006416      |
| <i>Petrocosmea grandiflora</i>                       | KR006467 | KR006454    | KR006504     | KR006373      | KR006437      |
| <i>Petrocosmea grandifolia</i>                       | -        | -           | KR006507     | -             | -             |
| <i>Petrocosmea hexiensis</i>                         | KR006469 | KR006461    | KR006497     | KR006359      | JX142182      |
| <i>Petrocosmea huanjiangensis</i>                    | KR006484 | KR006448    | KR006503     | KR006367      | KR006435      |
| <i>Petrocosmea iodoides</i>                          | JN092440 | JN092542    | KR006513     | JN092473      | JN092506      |
| <i>Petrocosmea kerrii</i>                            | JN092441 | JN092543    | KR006509     | GU350668      | JN092507      |
| <i>Petrocosmea longianthera</i>                      | -        | JN092530    | KR006514     | JN092461      | JN092481      |
| <i>Petrocosmea longipedicellata</i>                  | KR006474 | KR006439    | KR006490     | KR006352      | KR006422      |
| <i>Petrocosmea mairei</i>                            | KR006465 | KR006447    | KR006519     | KR006366      | KR006418      |
| <i>Petrocosmea martini</i>                           | JN092442 | JN092544    | -            | JN092475      | JN092508      |
| <i>Petrocosmea melanophthalma</i>                    | KR006481 | KR006449    | KR006493     | KR006356      | KR006436      |
| <i>Petrocosmea menglianensis</i>                     | JN092444 | JN092546    | KR006506     | JN092477      | JN092510      |
| <i>Petrocosmea minor</i>                             | KU985106 | JN092547    | KR006515     | FJ501502      | JN092507      |
| <i>Petrocosmea nervosa</i>                           | FJ501335 | JN092548    | KR006523     | FJ501504      | JN092511      |
| <i>Petrocosmea oblata</i>                            | KR337021 | JN092549    | KR006518     | AJ492299      | JN092512      |
| <i>Petrocosmea parryorum</i>                         | KR006463 | KR006453    | KR006508     | KR006354      | KR006426      |
| <i>Petrocosmea qinlingensis</i>                      | KR006470 | KR006446    | KR006521     | KR006364      | KR006419      |
| <i>Petrocosmea rosettifolia</i>                      | KR006473 | KR006455    | KR006510     | KR006369      | KR006428      |
| <i>Petrocosmea sericea</i>                           | JN092438 | JN092540    | KR006500     | GU350692      | JN092513      |
| <i>Petrocosmea shilinensis</i>                       | KR006486 | KR006450    | KR006511     | KR006370      | KR006434      |
| <i>Petrocosmea sichuanensis</i>                      | KR006480 | KR006459    | KR006496     | KR006358      | KR006429      |
| <i>Petrocosmea sinensis</i>                          | GU350660 | JN092550    | KR006522     | FJ501503      | JN092500      |
| <i>Petrocosmea xanthomaculata</i>                    | KR006477 | KR006441    | KR006488     | KR006374      | KR006421      |
| <i>Petrocosmea xingyiensis</i>                       | KR006485 | KR006451    | KR006502     | KR006368      | KR006432      |
| <i>Petrocosmea yanshanensis</i>                      | JN092429 | JN092531    | KR006499     | JN092462      | JN092495      |
| <i>Petrocosmea martini</i> var.<br><i>leiandra</i>   | JN092443 | JN092545    | KR006512     | -             | JN092509      |
| <i>Petrocosmea glabristoma</i>                       | KR006468 | KR006444    | KR006516     | KR006362      | KR006417      |
| <i>Petrocosmea kerrii</i> var. <i>crinita</i>        | KR006462 | KR006452    | KR006505     | KR006353      | KR006425      |
| <i>Petrocosmea mairei</i> var.<br><i>intraglabra</i> | KR006479 | KR006460    | KR006495     | KR006357      | KR006430      |
| <i>Allostigma guangxiense</i>                        | HQ632977 | -           | -            | HQ632880      | -             |

|                                       |          |          |          |          |          |
|---------------------------------------|----------|----------|----------|----------|----------|
| <i>Loxostigma cavaleriei</i>          | FJ501339 | -        | -        | FJ501509 | -        |
| <i>Loxostigma fimbrisepalum</i>       | KU985104 | -        | -        | FJ501507 | -        |
| <i>Loxostigma glabrifolium</i>        | HQ633006 | -        | -        | HQ632910 | -        |
| <i>Loxostigma griffithii</i>          | FJ501338 | OK322633 | OK322470 | FJ501508 | -        |
| <i>Pseudochirita guangxiensis</i>     | HQ633003 | OK322645 | OK322484 | HQ632908 | -        |
| <i>Raphiocarpus begoniifolius</i>     | OK322561 | OK322646 | OK322485 | -        | OK322669 |
| <i>Raphiocarpus jinpingensis</i>      | OK322562 | OK322647 | OK322486 | -        | -        |
| <i>Raphiocarpus longipedunculatus</i> | OK322563 | -        | -        | -        | OK322670 |
| <i>Raphiocarpus macrosiphon</i>       | HQ632978 | -        | -        | HQ632881 | -        |
| <i>Raphiocarpus petelotii</i>         | HQ632974 | JN092552 | KR006525 | FJ501517 | JN092515 |

---



| Species                                               | ITS      | <i>matK</i> | <i>rbcL</i> | <i>rpS16</i> | <i>atpB-rbcL</i> |
|-------------------------------------------------------|----------|-------------|-------------|--------------|------------------|
| <i>Hemiboea albiflora</i>                             | MN334629 | MN367403    | MN367386    | MN367331     | MN328737         |
| <i>Hemiboea cavaleriei</i>                            | -        | MN367405    | MN367382    | MN367333     | MN328738         |
| <i>Hemiboea cavalerier</i> var.<br><i>paucinervis</i> | MN334630 | -           | -           | MN367334     | -                |
| <i>Hemiboea crystallina</i>                           | MN334631 | MN367406    | MN367387    | MN367335     | MN328739         |
| <i>Hemiboea fangii</i>                                | MN334633 | MN367408    | MN367372    | MN367337     | MN328741         |
| <i>Hemiboea flaccida</i>                              | MN334634 | MN367409    | MN367381    | MN367338     | MN328742         |
| <i>Hemiboea follicularis</i>                          | -        | MN367410    | -           | MN367339     | MN328743         |
| <i>Hemiboea gracilis</i>                              | MN334635 | MN367411    | MN367375    | MN367340     | MN328744         |
| <i>Hemiboea gracilis</i> var.<br><i>pilobracteata</i> | -        | MN367412    | -           | MN367341     | -                |
| <i>Hemiboea latisejala</i>                            | MN334636 | MN367413    | -           | MN367342     | MN328745         |
| <i>Hemiboea longgangensis</i>                         | MN334637 | MN367414    | MN367376    | MN367343     | MN328746         |
| <i>Hemiboea longzhouensis</i>                         | MN334638 | MN367415    | MN367371    | MN367344     | MN328747         |
| <i>Hemiboea magnibracteata</i>                        | MN328762 | MN367402    | MN367384    | MN367330     | -                |
| <i>Hemiboea malipoensis</i>                           | MN334639 | MN367416    | MN367383    | MN367345     | -                |
| <i>Hemiboea mollifolia</i>                            | MN334640 | MN367417    | MN367373    | MN367346     | MN328748         |
| <i>Hemiboea omeiensis</i>                             | MN334641 | MN367418    | -           | MN367347     | MN328749         |
| <i>Hemiboea pterocaulis</i>                           | MN334642 | MN367419    | MN367389    | MN367348     | MN328750         |
| <i>Hemiboea purpurea</i>                              | MN334644 | MN367421    | MN367378    | MN367350     | MN328751         |
| <i>Hemiboea purpureotincta</i>                        | MN334645 | MN367422    | MN367374    | MN367351     | MN328752         |
| <i>Hemiboea rubibracteata</i>                         | MN334646 | MN367423    | MN367385    | MN367352     | -                |
| <i>Hemiboea strigosa</i>                              | MN334647 | MN367424    | -           | MN367353     | -                |
| <i>Hemiboea subcapitata</i>                           | MN334648 | MN367425    | MN367391    | MN367354     | MN328753         |
| <i>Hemiboea guangdongensis</i>                        | MF625025 | MN367436    | MN367398    | MN367366     | MN328760         |
| <i>Hemiboea subacaulis</i>                            | MN334658 | MN367437    | MN367380    | MN367367     | MN328761         |
| <i>Hemiboea suiyangensis</i>                          | MN334659 | MN367438    | MN367377    | MN367368     | -                |
| <i>Anna submontana</i>                                | FJ501362 | MN367401    | MN367399    | MN367370     | FJ501422         |
| <i>Petrocosmea minor</i>                              | KU985106 |             |             | KR006515     |                  |
| <i>Codonoboea codonion</i>                            | JF912565 | -           | -           | -            | -                |
| <i>Loxostigma dongxingensis</i>                       | HQ632975 | -           | -           | -            | -                |
| <i>Aeschynanthus tricolor</i>                         | EU919958 | -           | -           | -            | -                |
| <i>Briggsiopsis delavayi</i>                          | GU350647 | -           | KX527344    | -            | -                |
| <i>Cathayanthe biflora</i>                            | HQ632996 | -           | -           | -            | -                |
| <i>Chayamaritia banksiae</i>                          | KP325426 | -           | -           | -            | -                |
| <i>Didymocarpus stenanthos</i>                        | KR337008 | OK322625    | OK322598    | OK322460     | FJ501403         |
| <i>Lysionotus aeschynanthoides</i>                    | OK322554 | OK322634    | OK322608    | OK322472     | OK322496         |
| <i>Lysionotus wilsonii</i>                            | OK322560 | OK322640    | OK322615    | OK322478     | OK322503         |
| <i>Petrocodon coccineus</i>                           | KF202292 | KX526642    | KX527265    | -            | -                |
| <i>Petrocosmea xingyiensis</i>                        | KR006485 | KR006451    | -           | KR006502     | -                |

|                                   |          |          |          |          |          |
|-----------------------------------|----------|----------|----------|----------|----------|
| <i>Primulina langshanica</i>      | KF498109 | KJ137915 | -        | -        | KF497997 |
| <i>Pseudochirita guangxiensis</i> | HQ633003 | OK322645 | KX527259 | OK322484 | -        |
| <i>Raphiocarpus sinicus</i>       | HQ632973 | -        | -        | -        | -        |

---

414 *Lysionotus* (Gesneriaceae)

| Species                             | ITS      | <i>matK</i> | <i>ndhF</i> | <i>rbcL</i> | <i>rpS16</i> | <i>atpB-rbcL</i> | <i>rpL20-rpS12</i> | <i>trnE-trnT</i> | <i>trnL-trnF</i> | <i>trnT-trnL</i> |
|-------------------------------------|----------|-------------|-------------|-------------|--------------|------------------|--------------------|------------------|------------------|------------------|
| <i>Lysionotus aeschynanthoides</i>  | OK322554 | OK322634    | OK322441    | OK322608    | OK322472     | OK322496         | OK322580           | OK322531         | -                | -                |
| <i>Lysionotus chingii</i>           | AB547216 | OK322635    | OK322442    | OK322609    | OK322473     | OK322497         | OK322581           | OK322532         | FJ501498         | -                |
| <i>Lysionotus denticulosus</i>      | AB547217 | OK322636    | -           | OK322610    | OK322474     | OK322498         | OK322582           | OK322533         | KM232652         | -                |
| <i>Lysionotus fengshanensis</i>     | OK322555 | KJ137896    | KX657870    | KX657870    | -            | OK322499         | -                  | -                | -                | -                |
| <i>Lysionotus forrestii</i>         | -        | -           | -           | -           | -            | -                | -                  | -                | FJ501495         | -                |
| <i>Lysionotus gracilis</i>          | OK322556 | -           | OK322443    | OK322611    | OK322475     | -                | OK322583           | OK322534         | -                | -                |
| <i>Lysionotus longipedunculatus</i> | OK322557 | OK322637    | OK322444    | OK322612    | OK322476     | OK322500         | OK322584           | OK322535         | -                | OK322661         |
| <i>Lysionotus microphyllus</i>      | MN334660 | MN367439    | OK322445    | MN367400    | MN367369     | MN328762         | MT184603           | MT184686         | -                | -                |
| <i>Lysionotus oblongifolius</i>     | AB498571 | -           | -           | -           | -            | -                | -                  | -                | -                | -                |
| <i>Lysionotus pauciflorus</i>       | AB514442 | -           | -           | -           | -            | -                | -                  | -                | -                | -                |
| <i>Lysionotus petelotii</i>         | AB498587 | -           | OK322446    | -           | -            | -                | OK322585           | OK322536         | FJ501496         | -                |
| <i>Lysionotus sangzhiensis</i>      | KJ475423 | -           | -           | -           | -            | -                | -                  | -                | KM232653         | -                |
| <i>Lysionotus serratus</i>          | OK322558 | OK322638    | OK322447    | OK322613    | MT184629     | OK322501         | MT184605           | MT184688         | -                | OK322662         |
| <i>Lysionotus wilsonii</i>          | OK322560 | OK322640    | OK322449    | OK322615    | OK322478     | OK322503         | OK322587           | OK322538         | -                | -                |
| <i>Aeschynanthus tricolor</i>       | EU919958 | -           | -           | -           | -            | -                | -                  | -                | -                | -                |
| <i>Agalmyla biflora</i>             | FJ501361 | -           | -           | -           | -            | FJ501421         | -                  | -                | FJ501541         | -                |
| <i>Allocheilos guangxiensis</i>     | -        | -           | -           | KX527337    | -            | -                | -                  | -                | HQ632897         | -                |
| <i>Briggsiopsis delavayi</i>        | GU350647 | -           | -           | KX527344    | -            | -                | -                  | -                | HQ632879         | -                |
| <i>Cathyanthe biflora</i>           | HQ632996 | -           | -           | -           | -            | -                | -                  | -                | HQ632899         | -                |
| <i>Chayamaritia banksiae</i>        | KP325426 | -           | -           | -           | -            | -                | -                  | -                | KP325433         | -                |
| <i>Codonoboea codonion</i>          | JF912565 | -           | -           | -           | -            | -                | -                  | -                | JF912538         | -                |
| <i>Didymocarpus stenanthos</i>      | KR337008 | OK322625    | OK322429    | OK322598    | OK322460     | FJ501403         | OK322566           | OK322515         | FJ501512         | -                |
| <i>Glabrella longipes</i>           | AF055053 | OK322626    | OK322430    | OK322599    | OK322461     | FJ501423         | OK322567           | OK322516         | FJ501545         | OK322648         |
| <i>Gyrocheilos chorisepalus</i>     | KR337014 | -           | -           | -           | -            | -                | -                  | -                | KR476558         | -                |
| <i>Loxostigma dongxingensis</i>     | HQ632975 | -           | -           | -           | -            | -                | -                  | -                | HQ632878         | -                |

|                                   |          |          |   |          |          |          |   |          |          |          |
|-----------------------------------|----------|----------|---|----------|----------|----------|---|----------|----------|----------|
| <i>Microchirita caliginosa</i>    | FJ501325 | -        | - | -        | -        | FJ501391 | - | -        | FJ501488 | -        |
| <i>Petrocodon coccineus</i>       | KF202292 | KX526642 | - | KX527265 | -        | -        | - | -        | KF202299 | -        |
| <i>Petrocosmea xingyiensis</i>    | KR006485 | KR006451 | - | -        | KR006502 | -        | - | -        | KR006368 | KR006432 |
| <i>Primulina langshanica</i>      | KF498109 | KJ137915 | - | -        | -        | KF497997 | - | MF472119 | KF498232 | -        |
| <i>Pseudochirita guangxiensis</i> | HQ633003 | OK322645 | - | KX527259 | OK322484 | -        | - | OK322546 | HQ632908 | -        |
| <i>Raphiocarpus sinicus</i>       | HQ632973 | -        | - | -        | -        | -        | - | -        | HQ632877 | -        |

---

| Species                        | ITS      | <i>trnL-F</i> |
|--------------------------------|----------|---------------|
| <i>Paraboea acutifolia</i>     | KU203969 | -             |
| <i>Paraboea amplifolia</i>     | JN934754 | JN934712      |
| <i>Paraboea axillaris</i>      | KU203848 | KU203943      |
| <i>Paraboea banyengiana</i>    | JN934755 | JN934713      |
| <i>Paraboea barnettiae</i>     | KU203847 | KU203942      |
| <i>Paraboea birmanica</i>      | KU203849 | KU203944      |
| <i>Paraboea brachycarpa</i>    | KU203870 | KU203965      |
| <i>Paraboea brunnescens</i>    | KU203859 | KU203954      |
| <i>Paraboea burttii</i>        | KU203858 | KU203953      |
| <i>Paraboea caerulescens</i>   | KU203871 | KU203966      |
| <i>Paraboea capitata</i>       | FJ501315 | AJ492298      |
| <i>Paraboea clarkei</i>        | JN934757 | JN934715      |
| <i>Paraboea crassifolia</i>    | KU203970 | KU204042      |
| <i>Paraboea dictyoneura</i>    | KJ475415 | FJ501463      |
| <i>Paraboea divaricata</i>     | KU203865 | KU203960      |
| <i>Paraboea doitungensis</i>   | KU203846 | KU203941      |
| <i>Paraboea dushanensis</i>    | MF358698 | MF358714      |
| <i>Paraboea eburnea</i>        | KU203869 | KU203964      |
| <i>Paraboea effusa</i>         | JN934760 | JN934718      |
| <i>Paraboea ferruginea</i>     | KU203862 | -             |
| <i>Paraboea glabra</i>         | JN934761 | JN934719      |
| <i>Paraboea glabrescens</i>    | KU203852 | KU203947      |
| <i>Paraboea glabrisepala</i>   | JN934762 | JN934720      |
| <i>Paraboea glanduliflora</i>  | JN934763 | JN934721      |
| <i>Paraboea glandulosa</i>     | JN934784 | JN934742      |
| <i>Paraboea glutinosa</i>      | JN934764 | JN934722      |
| <i>Paraboea guilinensis</i>    | MF358701 | MF358717      |
| <i>Paraboea hainanensis</i>    | MF315101 | MF315107      |
| <i>Paraboea harroviana</i>     | JN934765 | JN934723      |
| <i>Paraboea havilandii</i>     | JN934766 | JN934724      |
| <i>Paraboea hekouensis</i>     | KU203843 | KU203938      |
| <i>Paraboea incudicarpa</i>    | JN934767 | JN934725      |
| <i>Paraboea insularis</i>      | KU203857 | KU203952      |
| <i>Paraboea lanata</i>         | -        | FJ501467      |
| <i>Paraboea laxa</i>           | -        | FJ501466      |
| <i>Paraboea leuserensis</i>    | KU203863 | KU203958      |
| <i>Paraboea longipetiolata</i> | KU203851 | KU203946      |
| <i>Paraboea manhaoensis</i>    | KU203842 | KU203937      |
| <i>Paraboea martinii</i>       | MF358702 | MF358718      |

|                                                   |          |          |
|---------------------------------------------------|----------|----------|
| <i>Paraboea middletonii</i>                       | KU203845 | KU203940 |
| <i>Paraboea minor</i>                             | KU203860 | KU203955 |
| <i>Paraboea neurophylla</i>                       | JN934769 | JN934727 |
| <i>Paraboea nutans</i>                            | MF358703 | MF358719 |
| <i>Paraboea paniculata</i>                        | JN934770 | JN934728 |
| <i>Paraboea paramartinii</i>                      | JN934771 | JN934729 |
| <i>Paraboea patens</i>                            | KU203864 | KU203959 |
| <i>Paraboea peltifolia</i>                        | -        | MF358720 |
| <i>Paraboea phanomensis</i>                       | KU203855 | KU203950 |
| <i>Paraboea rabilii</i>                           | KU203856 | KU203951 |
| <i>Paraboea rongxiana</i>                         | KJ475416 | KM232659 |
| <i>Paraboea rosea</i>                             | KU203866 | KU203961 |
| <i>Paraboea rufescens</i>                         | JN934772 | JN934730 |
| <i>Paraboea siamensis</i>                         | KU203853 | KU203948 |
| <i>Paraboea sinensis</i>                          | MF358704 | FJ501473 |
| <i>Paraboea sinovietnamica</i>                    | MF358706 | MF358729 |
| <i>Paraboea subplana</i>                          | KU203854 | KU203949 |
| <i>Paraboea suffruticosa</i>                      | JN934774 | JN934732 |
| <i>Paraboea swinhoei</i>                          | JN934775 | JN934733 |
| <i>Paraboea tarutaoensis</i>                      | JN934776 | JN934734 |
| <i>Paraboea tetrabracteata</i>                    | MF358707 | MF358723 |
| <i>Paraboea trachyphylla</i>                      | JN934777 | JN934735 |
| <i>Paraboea treubii</i>                           | KU203872 | KU203967 |
| <i>Paraboea triseipala</i>                        | JN934778 | JN934736 |
| <i>Paraboea umbellata</i>                         | MF358708 | MF358730 |
| <i>Paraboea variopila</i>                         | KU203868 | KU203963 |
| <i>Paraboea velutina</i>                          | MF358709 | MF358724 |
| <i>Paraboea verticillata</i>                      | JN934781 | JN934739 |
| <i>Paraboea vulpina</i>                           | JN934782 | JN934740 |
| <i>Paraboea xiangguiensis</i>                     | MF358711 | MF358726 |
| <i>Paraboea evrardii</i>                          | KU203790 | KU203885 |
| <i>Paraboea monticola</i>                         | KU203789 | KU203884 |
| <i>Paraboea multiflora</i>                        | KU203791 | KU203886 |
| <i>Paraboea harroviana</i> var. <i>ovata</i>      | JN934765 | JN934723 |
| <i>Paraboea capitata</i> var. <i>oblongifolia</i> | KU203861 | KU203956 |
| <i>Paraboea rufescens</i> var. <i>tomentosa</i>   | KU203971 | KU204043 |
| <i>Paraboea dolomitica</i>                        | MT379851 | MT379849 |
| <i>Damrongia clarkeana</i>                        | KU203806 | KU203901 |
| <i>Damrongia fulva</i>                            | KU203799 | KU203894 |
| <i>Damrongia lacunosa</i>                         | KU203801 | KU203896 |
| <i>Damrongia purpureolineata</i>                  | -        | KU203893 |

|                                   |          |          |
|-----------------------------------|----------|----------|
| <i>Damrongia trisepala</i>        | KU203803 | KU203899 |
| <i>Dorcoceras geoffrayi</i>       | KU203781 | -        |
| <i>Dorcoceras hygrometrica</i>    | KU203783 | KU203878 |
| <i>Dorcoceras philippense</i>     | KU203788 | KU203883 |
| <i>Kaisupeeia herbacea</i>        | KU203830 | FJ501459 |
| <i>Kaisupeeia orthocarpa</i>      | KU203834 | KU203928 |
| <i>Loxocarpus holtzumii</i>       | KU203821 | KU203916 |
| <i>Loxocarpus rufescens</i>       | KU203822 | KU203917 |
| <i>Loxocarpus semitorta</i>       | KU203823 | KU203918 |
| <i>Middletonia evrardii</i>       | KU203790 | KU203885 |
| <i>Middletonia monticola</i>      | -        | KU203884 |
| <i>Middletonia multiflora</i>     | KU203791 | KU203886 |
| <i>Ornithoboea arachnoidea</i>    | JN934751 | JN934709 |
| <i>Ornithoboea barbanthera</i>    | KU203839 | KU203934 |
| <i>Ornithoboea flexuosa</i>       | KU203836 | KU203931 |
| <i>Ornithoboea grandiflora</i>    | -        | KY580773 |
| <i>Ornithoboea maxwellii</i>      | KY580825 | KY580775 |
| <i>Ornithoboea occulta</i>        | KU203838 | KU203933 |
| <i>Ornithoboea pseudoflexuosa</i> | KY580829 | KU204040 |
| <i>Ornithoboea puglisiae</i>      | KU203840 | KU203935 |
| <i>Ornithoboea wildeana</i>       | JN934752 | JN934710 |
| <i>Somrania albiflora</i>         | KU203792 | KU203887 |
| <i>Somrania flavida</i>           | KU203794 | KU203889 |
| <i>Somrania lineata</i>           | -        | KU203888 |

---

| Species                                              | ITS      | <i>trnH-psbA</i> | <i>psbM-trnD</i> |
|------------------------------------------------------|----------|------------------|------------------|
| <i>Elatostema acuteserratum</i>                      | KP858860 | KP858600         | KP858673         |
| <i>Elatostema albopilosoides</i>                     | KP858885 | KP858577         | KP858722         |
| <i>Elatostema androstachyum</i>                      | KP858871 | KP858575         | KP858711         |
| <i>Elatostema asterocephalum</i>                     | KP858878 | KP858533         | KP858712         |
| <i>Elatostematoides australe</i>                     | KP858790 | KP858612         | KP858732         |
| <i>Elatostema balansae</i>                           | KP858847 | KP858559         | KP858696         |
| <i>Elatostema banahaense</i>                         | KP858815 | KP858592         | KP858662         |
| <i>Elatostema binatum</i>                            | KP858895 | KP858518         | KP858726         |
| <i>Elatostema brachyodontum</i>                      | KP858888 | KP858557         | KP858708         |
| <i>Elatostema calcareum</i>                          | KP858817 | KP858589         | KP858650         |
| <i>Elatostema cyrtandrifolium</i>                    | KP858844 | KP858558         | KP858700         |
| <i>Elatostema densistriolatum</i>                    | KF137850 | -                | -                |
| <i>Elatostema dissectum</i>                          | KP858832 | KP858607         | KP858740         |
| <i>Elatostema edule</i>                              | KP858818 | KP858591         | KP858664         |
| <i>Elatostema ellipticum</i>                         | -        | KP858641         | KP858774         |
| <i>Elatostema fengshanense</i>                       | KP858848 | KP858530         | KP858694         |
| <i>Elatostema ficoides</i>                           | KP858870 | KP858522         | KP858703         |
| <i>Elatostematoides fruticulosum</i>                 | KP858788 | KP858610         | KP858733         |
| <i>Elatostema garrettii</i>                          | KP858849 | KP858535         | KP858698         |
| <i>Elatostema goudotianum</i>                        | KP858798 | KP858629         | KP858749         |
| <i>Elatostema grande</i>                             | KP858821 | KP858598         | -                |
| <i>Elatostema grandidentatum</i>                     | KP858833 | KP858608         | KP858737         |
| <i>Elatostema grandifolium</i>                       | -        | KP858595         | KP858659         |
| <i>Elatostema gyrocephalum</i>                       | KP858886 | KP858570         | KP858727         |
| <i>Elatostema gyrocephalum</i> var. <i>pubicaule</i> | KP858887 | KP858578         | KP858728         |
| <i>Elatostema hechiense</i>                          | KP858875 | KP858537         | KP858729         |
| <i>Elatostema hezhouense</i>                         | KP858881 | KP858538         | KP858705         |
| <i>Elatostema hirtellipedunculatum</i>               | KP858863 | KP858568         | KP858671         |
| <i>Elatostema hookerianum</i>                        | KP858904 | KP858605         | KP858735         |
| <i>Elatostema huanjiangense</i>                      | -        | -                | KP858730         |
| <i>Elatostema hypoglaucum</i>                        | KP858891 | KP858516         | KP858718         |
| <i>Elatostema incisum</i>                            | KP858799 | KP858630         | KP858750         |
| <i>Elatostema insulare</i>                           | KP858839 | KP858554         | KP858681         |
| <i>Elatostema integrifolium</i>                      | KP858852 | KP858549         | KP858676         |
| <i>Elatostema involucreatum</i>                      | KP858866 | KP858574         | KP858672         |
| <i>Elatostema japonicum</i>                          | KP858867 | KP858566         | KP858715         |
| <i>Elatostema kraemeri</i>                           | KP858824 | KP858596         | KP858657         |
| <i>Elatostema laetevirens</i>                        | KP858893 | KP858524         | KP858683         |
| <i>Elatostema laevissimum</i>                        | KP858861 | KP858562         | KP858687         |



|                                                     |          |          |          |
|-----------------------------------------------------|----------|----------|----------|
| <i>Elatostema lineare</i>                           | KP858835 | KP858546 | KP858713 |
| <i>Elatostema lineolatum</i> var. <i>majus</i>      | KP858855 | KP858551 | KP858689 |
| <i>Elatostema lithoneurum</i>                       | KP858827 | KP858588 | KP858653 |
| <i>Elatostematoides lonchophyllum</i>               | KP858793 | KP858512 | KP858761 |
| <i>Elatostema longistipulum</i>                     | KP858856 | KP858552 | KP858679 |
| <i>Elatostema lungzhouense</i>                      | KP858868 | KP858565 | KP858716 |
| <i>Elatostema lutescens</i>                         | KP858816 | KP858585 | KP858651 |
| <i>Elatostema macintyreii</i>                       | KP858850 | KP858560 | KP858695 |
| <i>Elatostema madagascariense</i>                   | KP858800 | KP858631 | KP858752 |
| <i>Elatostema malacotrichum</i>                     | KP858876 | KP858544 | KP858710 |
| <i>Elatostema microcephalanthum</i>                 | KP858874 | KP858579 | KP858706 |
| <i>Elatostema monandrum</i>                         | KP858905 | KP858606 | KP858734 |
| <i>Elatostema monticola</i>                         | KP858803 | KP858628 | KP858690 |
| <i>Elatostema morobense</i>                         | KP858820 | KP858593 | KP858661 |
| <i>Elatostema multicaule</i>                        | KP858884 | KP858520 | KP858685 |
| <i>Elatostema myrtillum</i>                         | KP858880 | KP858523 | KP858704 |
| <i>Elatostema nasutum</i>                           | KP858902 | KP858603 | KP858741 |
| <i>Elatostema oblongifolium</i>                     | KP858897 | KP858545 | KP858724 |
| <i>Elatostema obtusum</i>                           | KP858901 | KP858513 | KP858739 |
| <i>Elatostema oligophlebium</i>                     | KP858877 | KP858548 | KP858721 |
| <i>Elatostema orientale</i>                         | KP858802 | KP858627 | KP858753 |
| <i>Elatostema paivaeum</i>                          | KP858804 | KP858625 | KP858754 |
| <i>Elatostema parvum</i>                            | KP858794 | KP858620 | KP858744 |
| <i>Elatostema penibukanense</i>                     | KP858854 | KP858542 | KP858693 |
| <i>Elatostema platyphyllum</i>                      | KP858858 | KP858540 | KP858678 |
| <i>Elatostema pusillum</i>                          | KP858906 | KP858602 | KP858736 |
| <i>Elatostema reticulatum</i>                       | KP858834 | KP858555 | KP858714 |
| <i>Elatostema rugosum</i>                           | -        | KP858640 | KP858773 |
| <i>Elatostema samoense</i>                          | KP858826 | KP858594 | KP858660 |
| <i>Elatostema serra</i>                             | KP858837 | KP858534 | KP858720 |
| <i>Elatostema sinense</i>                           | KP858797 | KP858619 | KP858747 |
| <i>Elatostema sinense</i> var. <i>longicornutum</i> | KP858795 | KP858622 | KP858745 |
| <i>Elatostema sinense</i> var. <i>xinningense</i>   | KP858796 | KP858621 | KP858746 |
| <i>Elatostema sinopurpureum</i>                     | KP858869 | KP858532 | KP858686 |
| <i>Elatostema pinnatum</i>                          | KP858836 | KP858521 | KP858719 |
| <i>Elatostema strictum</i>                          | KP858825 | KP858597 | KP858658 |
| <i>Elatostema strigillosum</i>                      | KP858813 | KP858583 | KP858667 |
| <i>Elatostema subcoriaceum</i>                      | KP858894 | KP858539 | KP858646 |
| <i>Elatostema sublineare</i>                        | KP858882 | KP858514 | KP858682 |
| <i>Elatostema suzukii</i>                           | KP858864 | KP858525 | KP858666 |
| <i>Elatostema tenuicaudatum</i>                     | KP858862 | KP858528 | KP858688 |
| <i>Elatostema tenuinerve</i>                        | KP858896 | KP858572 | KP858717 |

|                                                          |          |          |          |
|----------------------------------------------------------|----------|----------|----------|
| <i>Elatostema thalictroides</i>                          | KP858838 | KP858536 | KP858680 |
| <i>Elatostema tianeense</i>                              | KP858879 | KP858569 | KP858647 |
| <i>Elatostema obtusum</i> var. <i>trilobulatum</i>       | KP858900 | KP858515 | KP858738 |
| <i>Elatostematoides variolaminosum</i> var. <i>latum</i> | KP858791 | -        | KP858762 |
| <i>Elatostema villosum</i>                               | KP858812 | KP858582 | KP858668 |
| <i>Elatostematoides filicoides</i>                       | KP858789 | KP858611 | KP858731 |
| <i>Elatostema vittatum</i>                               | KP858792 | KP858609 | KP858763 |
| <i>Elatostema welwitschii</i>                            | KP858840 | KP858543 | KP858692 |
| <i>Elatostema xanthophyllum</i>                          | KP858890 | KP858571 | KP858702 |
| <i>Elatostema yachense</i>                               | KP858883 | KP858519 | KP858684 |
| <i>Elatostema yakushimense</i>                           | KP858892 | KP858517 | KP858670 |
| <i>Elatostema yaoshanense</i>                            | KP858903 | KP858604 | KP858742 |
| <i>Pellionia acutidentata</i>                            | KP858777 | KP858638 | KP858759 |
| <i>Pellionia grijsii</i>                                 | KC420491 | KP858635 | KC420504 |
| <i>Pellionia heteroloba</i>                              | KP858806 | KP858634 | KP858756 |
| <i>Pellionia minima</i>                                  | KP858809 | KP858636 | KP858757 |
| <i>Pellionia radicans</i>                                | KP858810 | KP858637 | KP858758 |
| <i>Pellionia repens</i>                                  | KU161129 | KU161130 | KU161131 |
| <i>Pellionia retrohispida</i>                            | KP858808 | KP858639 | KP858760 |
| <i>Pellionia scabra</i>                                  | KC420492 | KP858624 | KC420503 |
| <i>Pellionia viridis</i>                                 | KP858805 | KP858633 | KP858748 |
| <i>Procris archboldiana</i>                              | KP858785 | KP858614 | KP858769 |
| <i>Procris crenata</i>                                   | KP858782 | KP858616 | KP858766 |
| <i>Procris frutescens</i>                                | KP858781 | KP858618 | KP858764 |
| <i>Procris montana</i>                                   | KP858786 | KP858613 | KP858768 |
| <i>Boehmeria macrophylla</i>                             | KF137810 | -        | KM895312 |
| <i>Debregeasia orientalis</i>                            | KP858779 | KP858508 | KP858772 |
| <i>Lecanthus peduncularis</i>                            | KP858787 | KP858511 | KP858645 |
| <i>Leucosyke quadrinervia</i>                            | KF137875 | -        | -        |
| <i>Nanocnide japonica</i>                                | KP858907 | KP858505 | KP858642 |
| <i>Poikilospermum acuminatum</i>                         | KP858908 | KP858510 | KP858644 |

---

417 Asian *Begonia* clade (Begoniaceae)

| Species                       | ITS      | <i>ndhA</i> | <i>ndhF-rpl32</i> | <i>psbM-trnD</i> | <i>psbM-ycf6</i> | <i>trnC-ycf6</i> | <i>trnL-rpl32</i> |
|-------------------------------|----------|-------------|-------------------|------------------|------------------|------------------|-------------------|
| <i>Begonia alicida</i>        | KF636419 | JF756388    | JF756472          | -                | -                | -                | JF756556          |
| <i>Begonia acclivis</i>       | MG954100 | MG953902    | MG953837          | MG953889         | MG953878         | MG953863         | MG953850          |
| <i>Begonia acuminatissima</i> | KR186965 | KR186445    | KR186532          | KR186619         | KR186879         | KR186792         | KR186706          |
| <i>Begonia anisoptera</i>     | JX656720 | KR186448    | KR186535          | KR186622         | KR186882         | KR186795         | KR186709          |
| <i>Begonia biliranensis</i>   | KR186967 | KR186449    | KR186536          | KR186623         | KR186883         | KR186796         | KR186710          |
| <i>Begonia blancii</i>        | KR186968 | KR186450    | KR186537          | KR186624         | KR186884         | KR186797         | KR186711          |
| <i>Begonia calcicola</i>      | JX656708 | KR186452    | KR186539          | KR186626         | KR186886         | KR186799         | KR186713          |
| <i>Begonia castilloi</i>      | KR186969 | KR186454    | KR186541          | KR186628         | KR186888         | KR186801         | KR186715          |
| <i>Begonia chingipengii</i>   | KR186970 | KR186455    | KR186542          | KR186629         | KR186889         | KR186802         | KR186716          |
| <i>Begonia chloroneura</i>    | KC626071 | JF756394    | KR186543          | KR186630         | KR186890         | KR186803         | JF756562          |
| <i>Begonia cleopatrae</i>     | KR186972 | JF756390    | KR186544          | KR186631         | KR186891         | KR186804         | JF756558          |
| <i>Begonia copelandii</i>     | LC021530 | -           | -                 | -                | -                | -                | -                 |
| <i>Begonia coronensis</i>     | JX656715 | -           | -                 | -                | -                | -                | -                 |
| <i>Begonia culasiensis</i>    | -        | KR186459    | KR186545          | KR186632         | KR186892         | KR186805         | KR186719          |
| <i>Begonia elmeri</i>         | JX656714 | KR186462    | KR186549          | KR186636         | KR186896         | KR186809         | KR186722          |
| <i>Begonia fenicis</i>        | KR186977 | KR186465    | KR186551          | KR186638         | KR186899         | KR186811         | KR186724          |
| <i>Begonia gitingensis</i>    | KR186979 | KR186470    | KR186557          | KR186644         | KR186904         | KR186817         | KR186730          |
| <i>Begonia gueritziana</i>    | KR186980 | KM378666    | KR186559          | KR186645         | KR186905         | KR186819         | KM378702          |
| <i>Begonia gutierrezii</i>    | KR186982 | MG953900    | MG953835          | KR186647         | MG953874         | KR186820         | -                 |
| <i>Begonia hernandioides</i>  | JX656707 | KR186475    | KR186561          | KR186648         | KR186909         | KR186821         | KR186734          |
| <i>Begonia klemmei</i>        | JX656709 | KR186480    | KR186567          | KR186654         | KR186914         | KR186827         | KR186740          |
| <i>Begonia longiscapa</i>     | KR186986 | KR186482    | KR186570          | KR186656         | KR186916         | KR186830         | KR186743          |
| <i>Begonia luzonensis</i>     | KR186988 | KR186484    | KR186571          | KR186659         | KR186918         | KR186831         | KR186744          |
| <i>Begonia manillensis</i>    | KR186990 | KR186486    | KR186573          | KR186660         | KR186920         | KR186833         | KR186746          |
| <i>Begonia merrilliana</i>    | -        | KR186488    | KR186575          | KR186662         | KR186922         | KR186835         | KR186748          |
| <i>Begonia mindorensis</i>    | MG954099 | KR186489    | KR186577          | MG953897         | MG953877         | MG953871         | KR186750          |
| <i>Begonia nigritarum</i>     | KR186999 | KR186492    | KR186581          | KR186671         | KR186933         | KR186844         | KR186752          |
| <i>Begonia obtusifolia</i>    | KR186993 | KR186501    | KR186588          | KR186675         | KR186935         | KR186848         | KR186761          |

|                                   |          |          |          |          |          |          |          |
|-----------------------------------|----------|----------|----------|----------|----------|----------|----------|
| <i>Begonia oxysperma</i>          | KR186994 | KR186502 | KR186589 | KR186676 | KR186936 | KR186850 | KR186762 |
| <i>Begonia rubiteae</i>           | -        | KR186505 | KR186592 | KR186679 | KR186939 | KR186852 | KR186765 |
| <i>Begonia rubrifolia</i>         | JX656711 | -        | -        | -        | -        | -        | -        |
| <i>Begonia rufipila</i>           | KF636482 | KR186506 | KR186593 | KR186680 | KR186940 | KR186853 | KR186766 |
| <i>Begonia subnummularifolia</i>  | KF636487 | KR186516 | KR186603 | KR186690 | KR186950 | KR186863 | KR186776 |
| <i>Begonia suborbiculata</i>      | HQ729069 | KR186517 | KR186604 | KR186691 | KR186951 | KR186864 | KR186777 |
| <i>Begonia sykakiengii</i>        | -        | KR186519 | KR186606 | KR186693 | KR186953 | KR186866 | KR186780 |
| <i>Begonia tandangii</i>          | AB828324 | -        | -        | -        | -        | -        | -        |
| <i>Begonia tayabensis</i>         | JX656718 | KR186525 | KR186612 | KR186699 | KR186959 | KR186872 | KR186785 |
| <i>Begonia trichochila</i>        | KR187010 | KR186527 | KR186614 | KR186701 | KR186961 | KR186874 | KR186787 |
| <i>Begonia wadei</i>              | KF636490 | KR186528 | KR186615 | KR186702 | KR186962 | KR186875 | KR186788 |
| <i>Begonia woodii</i>             | -        | KR186529 | KR186617 | KR186703 | KR186964 | KR186876 | KR186790 |
| <i>Begonia aberrans</i>           | MG993367 | -        | -        | -        | -        | -        | -        |
| <i>Begonia barbellata</i>         | -        | MH207052 | MH207462 | -        | -        | -        | MH207878 |
| <i>Begonia beludruvenea</i>       | -        | -        | MH207465 | -        | -        | -        | MH207881 |
| <i>Begonia bracteata</i>          | MG993355 | KP712991 | KP713110 | -        | -        | -        | KP713323 |
| <i>Begonia lepida</i>             | MG993361 | JF756400 | JF756484 | -        | -        | -        | JF756568 |
| <i>Begonia verecunda</i>          | MG993376 | JF756399 | JF756483 | -        | -        | -        | JF756567 |
| <i>Begonia arachnoidea</i>        | KF636420 | -        | -        | -        | -        | -        | -        |
| <i>Begonia auritistipula</i>      | KF636422 | -        | -        | -        | -        | -        | -        |
| <i>Begonia austroguangxiensis</i> | KF636423 | -        | -        | -        | -        | -        | -        |
| <i>Begonia bamaensis</i>          | KF636424 | -        | -        | -        | -        | -        | -        |
| <i>Begonia biflora</i>            | JF975960 | -        | -        | -        | -        | -        | -        |
| <i>Begonia crystallina</i>        | JF975966 | -        | -        | -        | -        | -        | -        |
| <i>Begonia curvicarpa</i>         | MK541055 | MK548077 | -        | -        | -        | -        | -        |
| <i>Begonia cylindrica</i>         | JF975970 | -        | -        | -        | -        | -        | -        |
| <i>Begonia daxinensis</i>         | -        | KT599090 | -        | -        | -        | -        | -        |
| <i>Begonia fangii</i>             | KR704285 | KT599080 | -        | -        | -        | -        | -        |
| <i>Begonia guangxiensis</i>       | JF975990 | MK548116 | -        | -        | -        | -        | -        |
| <i>Begonia huangii</i>            | JF976001 | -        | -        | -        | -        | -        | -        |

|                                 |          |          |          |          |          |          |          |
|---------------------------------|----------|----------|----------|----------|----------|----------|----------|
| <i>Begonia jingxiensis</i>      | KF636448 | KT599068 | -        | -        | -        | -        | -        |
| <i>Begonia lanternaria</i>      | JF976005 | -        | -        | -        | -        | -        | -        |
| <i>Begonia leprosa</i>          | JF976010 | KT599063 | -        | -        | -        | -        | MH235433 |
| <i>Begonia liuyanii</i>         | JF975985 | KT599076 | -        | -        | -        | -        | -        |
| <i>Begonia longistyla</i>       | KF636460 | -        | -        | -        | -        | -        | -        |
| <i>Begonia luochengensis</i>    | MK541083 | KT599057 | -        | -        | -        | -        | -        |
| <i>Begonia luzhaiensis</i>      | MK541050 | MK548071 | -        | -        | -        | MG063420 | -        |
| <i>Begonia masoniana</i>        | JF976020 | JF756372 | JF756456 | KR186661 | KR186921 | KR186834 | JF756540 |
| <i>Begonia morsei</i>           | AF485130 | JF756373 | JF756457 | -        | -        | -        | JF756541 |
| <i>Begonia ningmingensis</i>    | MK541062 | MK548086 | -        | KR186674 | KR186934 | KR186847 | KR186760 |
| <i>Begonia ornithophylla</i>    | JF976032 | -        | -        | -        | -        | -        | -        |
| <i>Begonia pengii</i>           | KF636475 | -        | -        | -        | -        | -        | -        |
| <i>Begonia picturata</i>        | -        | KT599050 | -        | -        | -        | -        | -        |
| <i>Begonia platycarpa</i>       | JF976033 | -        | -        | -        | -        | -        | -        |
| <i>Begonia porteri</i>          | MK541082 | MK548104 | -        | -        | -        | -        | -        |
| <i>Begonia pseudodaxinensis</i> | -        | KT599048 | -        | -        | -        | -        | -        |
| <i>Begonia pseudodryadis</i>    | -        | -        | MH207731 | -        | -        | -        | -        |
| <i>Begonia pulvinifera</i>      | KF636477 | MH207322 | MH207735 | -        | -        | -        | -        |
| <i>Begonia semiparietalis</i>   | KF636483 | -        | -        | -        | -        | -        | -        |
| <i>Begonia sinofloribunda</i>   | KF636486 | MH207363 | MH207778 | -        | -        | -        | MH208176 |
| <i>Begonia umbraculifolia</i>   | JF976050 | KT599044 | -        | -        | -        | -        | -        |
| <i>Begonia variegata</i>        | KF636489 | -        | -        | -        | -        | -        | MH208225 |
| <i>Begonia variifolia</i>       | MK541076 | MK548099 | -        | -        | -        | -        | -        |
| <i>Begonia yishanensis</i>      | MK541086 | MK548111 | -        | -        | -        | -        | -        |
| <i>Begonia yizhouensis</i>      | MK541066 | MK548088 | -        | -        | -        | -        | -        |
| <i>Begonia zhengyiana</i>       | JF976062 | -        | -        | -        | -        | -        | -        |
| <i>Begonia alveolata</i>        | AY048977 | -        | -        | -        | -        | -        | -        |
| <i>Begonia arborea</i>          | KP710824 | -        | -        | -        | -        | -        | -        |
| <i>Begonia brandisiana</i>      | -        | JF756379 | JF756463 | -        | -        | -        | JF756547 |
| <i>Begonia cavaleriei</i>       | GU176060 | MK548080 | -        | -        | -        | -        | -        |
| <i>Begonia demissa</i>          | HQ729026 | JF756384 | JF756468 | -        | -        | -        | JF756552 |

|                              |          |          |          |          |          |          |          |
|------------------------------|----------|----------|----------|----------|----------|----------|----------|
| <i>Begonia dioica</i>        | HQ729038 | MH207132 | MH207542 | -        | -        | -        | MH207955 |
| <i>Begonia discreta</i>      | HQ729024 | -        | -        | -        | -        | -        | -        |
| <i>Begonia fimbriatipula</i> | KF636439 | KT599040 | -        | -        | -        | -        | -        |
| <i>Begonia flagellaris</i>   | HQ729031 | MH207149 | MH207560 | -        | -        | -        | JF756521 |
| <i>Begonia gigabracteata</i> | -        | MH207165 | MH207577 | -        | -        | -        | MH207991 |
| <i>Begonia grandis</i>       | MK541077 | MK548100 | JF756435 | -        | -        | -        | JF756519 |
| <i>Begonia josephii</i>      | HQ729037 | -        | -        | -        | -        | -        | -        |
| <i>Begonia labordei</i>      | KP710825 | KF521899 | -        | -        | -        | -        | -        |
| <i>Begonia leptoptera</i>    | HQ729033 | -        | -        | -        | -        | -        | -        |
| <i>Begonia lithophila</i>    | KP710823 | MH207225 | MH207635 | -        | -        | -        | MH208049 |
| <i>Begonia mashanica</i>     | KF636449 | -        | -        | -        | -        | -        | -        |
| <i>Begonia murina</i>        | -        | MH207255 | MH207667 | -        | -        | -        | MH208077 |
| <i>Begonia ovatifolia</i>    | HQ729032 | -        | -        | -        | -        | -        | -        |
| <i>Begonia picta</i>         | HQ729041 | MH207294 | MH207708 | -        | -        | -        | MH208112 |
| <i>Begonia poilanei</i>      | -        | MH207305 | MH207719 | -        | -        | -        | MH208122 |
| <i>Begonia rabilii</i>       | HQ729027 | JF756383 | JF756467 | -        | -        | -        | JF756551 |
| <i>Begonia ravenii</i>       | HQ729040 | -        | -        | -        | -        | -        | -        |
| <i>Begonia rubella</i>       | HQ729043 | MH207336 | MH207749 | -        | -        | -        | MH208148 |
| <i>Begonia ruboides</i>      | JF976044 | -        | -        | -        | -        | -        | -        |
| <i>Begonia tribenensis</i>   | HQ729045 | MH207404 | MH207826 | -        | -        | -        | MH208217 |
| <i>Begonia wenshanensis</i>  | AY048974 | -        | -        | -        | -        | -        | -        |
| <i>Begonia wilsonii</i>      | KP710819 | MH207423 | MH207844 | -        | -        | -        | MH208231 |
| <i>Begonia yunnanensis</i>   | -        | MH207426 | MH207847 | -        | -        | -        | MH208234 |
| <i>Begonia dipetala</i>      | AF469124 | KR186460 | JF756425 | KR186634 | KR186894 | KR186807 | KR186720 |
| <i>Begonia droopiae</i>      | -        | MH207136 | MH207545 | -        | -        | -        | MH207959 |
| <i>Begonia forbesii</i>      | JX656704 | KR186467 | -        | KR186641 | KR186901 | KR186814 | KR186727 |
| <i>Begonia foxworthyi</i>    | JX656702 | KR186468 | -        | KR186642 | KR186902 | KR186815 | KR186728 |
| <i>Begonia goegoensis</i>    | AF485138 | JF756376 | JF756460 | -        | -        | -        | JF756544 |
| <i>Begonia ignorata</i>      | -        | KR186478 | -        | KR186652 | KR186912 | KR186825 | KR186738 |
| <i>Begonia kemumuensis</i>   | -        | MH207212 | MH207621 | -        | -        | -        | MH208035 |
| <i>Begonia kudoensis</i>     | -        | MH207217 | MH207628 | -        | -        | -        | MH208042 |

|                               |          |          |          |          |          |          |          |
|-------------------------------|----------|----------|----------|----------|----------|----------|----------|
| <i>Begonia muricata</i>       | AY753725 | JF756378 | JF756462 | -        | -        | -        | JF756546 |
| <i>Begonia nurii</i>          | -        | MH207260 | MH207672 | -        | -        | -        | MH208081 |
| <i>Begonia pasamanensis</i>   | HQ729070 | MH207285 | MH207697 | -        | -        | -        | MH208102 |
| <i>Begonia puspitae</i>       | -        | MH207323 | MH207736 | -        | -        | -        | MH208134 |
| <i>Begonia rajah</i>          | AF485136 | MH207327 | MH454103 | -        | -        | -        | MH208140 |
| <i>Begonia reginula</i>       | -        | MH207330 | MH454104 | -        | -        | -        | MH208142 |
| <i>Begonia simolapensis</i>   | -        | -        | MH207777 | -        | -        | -        | MH208175 |
| <i>Begonia stictopoda</i>     | JX656705 | MH207387 | MH207806 | -        | -        | -        | MH208198 |
| <i>Begonia sublobata</i>      | -        | KR186515 | -        | KR186689 | KR186949 | KR186862 | KR186775 |
| <i>Begonia sudjanae</i>       | -        | JF756377 | JF756461 | -        | -        | -        | JF756545 |
| <i>Begonia tigrina</i>        | JX656703 | KR186526 | -        | KR186700 | KR186960 | KR186873 | KR186786 |
| <i>Begonia trichopoda</i>     | -        | MH207405 | MH207827 | -        | -        | -        | MH208218 |
| <i>Begonia yappii</i>         | KF636491 | -        | -        | -        | -        | -        | -        |
| <i>Begonia yenyeniae</i>      | -        | -        | MH454102 | -        | -        | -        | -        |
| <i>Begonia pteridiformis</i>  | -        | -        | MH207732 | -        | -        | -        | MH208132 |
| <i>Begonia elisabethae</i>    | -        | JF756381 | JF756465 | -        | -        | -        | JF756549 |
| <i>Begonia martabanica</i>    | -        | -        | -        | -        | -        | -        | MH244440 |
| <i>Begonia sibthorpioides</i> | -        | MH207359 | MH207775 | -        | -        | -        | MH208171 |
| <i>Begonia tenuifolia</i>     | HQ873478 | JF756349 | JF756433 | -        | -        | -        | JF756517 |
| <i>Begonia variabilis</i>     | AY753732 | -        | -        | -        | -        | -        | -        |
| <i>Begonia aequata</i>        | AF485147 | -        | -        | -        | -        | -        | -        |
| <i>Begonia alabensis</i>      | -        | MH207030 | MH207441 | -        | -        | -        | MH207859 |
| <i>Begonia amphioxus</i>      | AF485150 | JF756397 | MH207449 | -        | -        | -        | JF756565 |
| <i>Begonia anthonyi</i>       | KF636431 | -        | -        | -        | -        | -        | -        |
| <i>Begonia atricha</i>        | HQ729047 | MH207047 | MH207457 | -        | -        | -        | MH207872 |
| <i>Begonia augustae</i>       | -        | MH207048 | MH207458 | -        | -        | -        | MH207873 |
| <i>Begonia baik</i>           | -        | MH207050 | -        | -        | -        | -        | MH207875 |
| <i>Begonia baramensis</i>     | -        | -        | MH207461 | -        | -        | -        | MH207877 |
| <i>Begonia berhamanii</i>     | KF636426 | -        | -        | -        | -        | -        | -        |
| <i>Begonia beryllae</i>       | -        | KM378676 | MH207466 | -        | -        | -        | KM378712 |
| <i>Begonia bipinnatifida</i>  | KF636427 | MH207058 | MH207470 | -        | -        | -        | MH207886 |

|                               |          |          |          |          |          |          |          |
|-------------------------------|----------|----------|----------|----------|----------|----------|----------|
| <i>Begonia bolsteri</i>       | KF636428 | -        | -        | -        | -        | -        | -        |
| <i>Begonia bonthainensis</i>  | MG993354 | KP712932 | KP713108 | KR186625 | KR186885 | KR186798 | KP713327 |
| <i>Begonia brevipes</i>       | HQ729048 | -        | -        | -        | -        | -        | -        |
| <i>Begonia brevirimosa</i>    | AF485145 | JF756414 | JF756498 | -        | -        | -        | JF756582 |
| <i>Begonia bruneiana</i>      | -        | MH207071 | MH207482 | -        | -        | -        | MH207899 |
| <i>Begonia burbridgei</i>     | MG993356 | MH207080 | KM378690 | -        | -        | -        | MH207906 |
| <i>Begonia capituliformis</i> | MG993357 | JN133309 | JN133384 | -        | -        | -        | JN133413 |
| <i>Begonia cauliflora</i>     | -        | MH207027 | KM378693 | -        | -        | -        | MH207855 |
| <i>Begonia chiasmogyna</i>    | HQ729050 | JN133310 | JN133385 | -        | -        | -        | JN133414 |
| <i>Begonia chlorosticta</i>   | AF485153 | JF756402 | JF756486 | -        | -        | -        | JF756570 |
| <i>Begonia comestibilis</i>   | -        | JN133311 | JN133386 | -        | -        | -        | JN133415 |
| <i>Begonia congesta</i>       | -        | JN133306 | JN133381 | -        | -        | -        | JN133410 |
| <i>Begonia contracta</i>      | KF636433 | -        | -        | -        | -        | -        | -        |
| <i>Begonia corrugata</i>      | -        | JF756401 | JF756485 | -        | -        | -        | JF756569 |
| <i>Begonia crispipila</i>     | HQ729051 | -        | -        | -        | -        | -        | -        |
| <i>Begonia cucphuongensis</i> | -        | MH207123 | MH207534 | -        | -        | -        | -        |
| <i>Begonia cyanescens</i>     | -        | MH207127 | MH207537 | -        | -        | -        | MH207950 |
| <i>Begonia didyma</i>         | -        | KP712936 | KP713129 | -        | -        | -        | KP713226 |
| <i>Begonia divaricata</i>     | MG993358 | -        | -        | -        | -        | -        | -        |
| <i>Begonia erythrogyna</i>    | KF636438 | MH207140 | MH207550 | -        | -        | -        | MH207964 |
| <i>Begonia flacca</i>         | -        | JN133312 | JN133387 | -        | -        | -        | JN133416 |
| <i>Begonia guttapila</i>      | -        | JF756405 | JF756489 | -        | -        | -        | JF756573 |
| <i>Begonia hainanensis</i>    | KF636443 | MH207175 | MH207584 | -        | -        | -        | MH208001 |
| <i>Begonia harauensis</i>     | MG993360 | -        | -        | -        | -        | -        | -        |
| <i>Begonia hekensis</i>       | -        | JN133313 | JN133388 | -        | -        | -        | JN133417 |
| <i>Begonia hispidissima</i>   | -        | JN133314 | JN133389 | -        | -        | -        | JN133418 |
| <i>Begonia holttumii</i>      | -        | MH207192 | MH207602 | -        | -        | -        | MH208016 |
| <i>Begonia imbricata</i>      | -        | KM378679 | KM378697 | -        | -        | -        | KM378715 |
| <i>Begonia incisa</i>         | AF485148 | -        | -        | -        | -        | -        | -        |
| <i>Begonia inobongensis</i>   | -        | MH207200 | MH207610 | -        | -        | -        | MH208024 |
| <i>Begonia inostegia</i>      | KF636446 | MH207201 | MH207611 | -        | -        | -        | MH208025 |



|                                |          |          |          |          |          |          |          |
|--------------------------------|----------|----------|----------|----------|----------|----------|----------|
| <i>Begonia isoptera</i>        | KF636447 | MH207205 | MH207615 | -        | -        | -        | MH208029 |
| <i>Begonia jambilahana</i>     | -        | MH207209 | MH207619 | -        | -        | -        | MH208033 |
| <i>Begonia kinabaluensis</i>   | KF636450 | -        | -        | -        | -        | -        | -        |
| <i>Begonia koordersii</i>      | HQ729052 | JF756407 | JF756491 | -        | -        | -        | JF756575 |
| <i>Begonia lagunensis</i>      | KF636453 | -        | -        | -        | -        | -        | -        |
| <i>Begonia lambii</i>          | KF636454 | -        | -        | -        | -        | -        | -        |
| <i>Begonia laruei</i>          | HQ729058 | JF756403 | MH235412 | KR186655 | KR186915 | KR186828 | MH235417 |
| <i>Begonia lasioura</i>        | -        | JN133315 | JN133390 | -        | -        | -        | JN133419 |
| <i>Begonia macintyreana</i>    | HQ729054 | JN133316 | JN133391 | -        | -        | -        | JN133420 |
| <i>Begonia madaiensis</i>      | KF636462 | -        | -        | -        | -        | -        | -        |
| <i>Begonia malachosticta</i>   | AF485156 | -        | -        | -        | -        | -        | -        |
| <i>Begonia mamutensis</i>      | -        | MH207240 | MH207649 | -        | -        | -        | KM378707 |
| <i>Begonia masarangensis</i>   | -        | JF756409 | JF756493 | -        | -        | -        | JF756577 |
| <i>Begonia mekonggensis</i>    | -        | JN133308 | JN133383 | -        | -        | -        | JN133412 |
| <i>Begonia mendumiae</i>       | -        | JN133317 | JN133392 | -        | -        | -        | JN133421 |
| <i>Begonia merrittii</i>       | KF636464 | -        | -        | -        | -        | -        | -        |
| <i>Begonia multijugata</i>     | -        | JF756404 | JF756488 | -        | -        | -        | JF756572 |
| <i>Begonia negrosensis</i>     | HQ729055 | JF756411 | JF756495 | -        | -        | -        | JF756579 |
| <i>Begonia nobmanniae</i>      | -        | JN133318 | JN133393 | -        | -        | -        | JN133422 |
| <i>Begonia oblongifolia</i>    | -        | KM378668 | KM378688 | -        | -        | -        | MH208085 |
| <i>Begonia ozotothrix</i>      | MG993362 | JN133319 | JN133394 | -        | -        | -        | JN133423 |
| <i>Begonia padangensis</i>     | MG993363 | -        | -        | -        | -        | -        | -        |
| <i>Begonia palawanensis</i>    | MG993364 | KR186504 | KR186591 | -        | -        | -        | KR186764 |
| <i>Begonia panayensis</i>      | KF636469 | -        | -        | -        | -        | -        | -        |
| <i>Begonia papyraptera</i>     | -        | MH207278 | MH207689 | -        | -        | -        | -        |
| <i>Begonia pendula</i>         | -        | JF756395 | JF756479 | -        | -        | -        | JF756563 |
| <i>Begonia polilloensis</i>    | -        | JF756412 | JF756496 | -        | -        | -        | -        |
| <i>Begonia prionota</i>        | -        | JN133320 | JN133395 | -        | -        | -        | JN133424 |
| <i>Begonia pseudolateralis</i> | HQ729053 | JF756408 | JF756492 | -        | -        | -        | JF756576 |
| <i>Begonia racemosa</i>        | MG993365 | MH207324 | MH207738 | -        | -        | -        | MH208136 |
| <i>Begonia rachmatii</i>       | -        | MH207326 | MH207739 | -        | -        | -        | MH208137 |

|                                  |          |          |          |   |   |   |          |
|----------------------------------|----------|----------|----------|---|---|---|----------|
| <i>Begonia ramosii</i>           | HQ729057 | -        | -        | - | - | - | -        |
| <i>Begonia rantemarioensis</i>   | -        | JN133321 | MH207743 | - | - | - | JN133425 |
| <i>Begonia rubida</i>            | -        | MH207337 | MH207750 | - | - | - | MH208149 |
| <i>Begonia sanguineopilosa</i>   | -        | JN133322 | JN133397 | - | - | - | JN133426 |
| <i>Begonia serratipetala</i>     | KF636484 | JF756413 | JF756497 | - | - | - | JF756581 |
| <i>Begonia sicutensis</i>        | -        | MH207361 | -        | - | - | - | MH208173 |
| <i>Begonia siccacaudata</i>      | MG993368 | JF756418 | JF756502 | - | - | - | JF756586 |
| <i>Begonia stenogyna</i>         | -        | MH207385 | MH207805 | - | - | - | MH208197 |
| <i>Begonia sublongipes</i>       | -        | KF521905 | -        | - | - | - | -        |
| <i>Begonia torajana</i>          | -        | JN133332 | JN133407 | - | - | - | JN133436 |
| <i>Begonia vaccinioides</i>      | -        | KM378682 | KM378700 | - | - | - | KM378718 |
| <i>Begonia varipeltata</i>       | HQ729056 | JF756410 | MH207838 | - | - | - | MH208226 |
| <i>Begonia vermeulenii</i>       | -        | JN133333 | JN133408 | - | - | - | JN133437 |
| <i>Begonia watuwilensis</i>      | -        | JF756406 | JF756490 | - | - | - | JF756574 |
| <i>Begonia weigallii</i>         | -        | JN133334 | JN133409 | - | - | - | JN133438 |
| <i>Begonia wrayi</i>             | MG993378 | JF756398 | -        | - | - | - | JF756566 |
| <i>Begonia abdullahpieei</i>     | -        | MH207018 | MH207427 | - | - | - | MH207848 |
| <i>Begonia aborensis</i>         | -        | MH207019 | MH207428 | - | - | - | MH207849 |
| <i>Begonia acetosella</i>        | AY048976 | JF756367 | JF756451 | - | - | - | JF756535 |
| <i>Begonia alpina</i>            | AY753717 | -        | -        | - | - | - | -        |
| <i>Begonia annulata</i>          | HQ729060 | -        | -        | - | - | - | -        |
| <i>Begonia aptera</i>            | AJ287258 | JF756369 | JF756453 | - | - | - | JF756537 |
| <i>Begonia areolata</i>          | -        | JF756366 | JF756450 | - | - | - | JF756534 |
| <i>Begonia augustinei</i>        | KF636421 | KF521900 | -        | - | - | - | -        |
| <i>Begonia austrotaiwanensis</i> | AJ491199 | -        | -        | - | - | - | -        |
| <i>Begonia balansana</i>         | AF485091 | MH207051 | MH207460 | - | - | - | MH207876 |
| <i>Begonia baviensis</i>         | JF975955 | MH207054 | MH207464 | - | - | - | MH207880 |
| <i>Begonia cathayana</i>         | AY753719 | KT599095 | -        | - | - | - | -        |
| <i>Begonia cathcartii</i>        | -        | MH207089 | MH207499 | - | - | - | MH207915 |
| <i>Begonia ceratocarpa</i>       | AY048978 | MH207090 | MH207500 | - | - | - | MH207916 |
| <i>Begonia chitoensis</i>        | AJ491202 | -        | -        | - | - | - | -        |

|                                |          |          |          |   |   |   |          |
|--------------------------------|----------|----------|----------|---|---|---|----------|
| <i>Begonia circumlobata</i>    | KP710815 | -        | -        | - | - | - | -        |
| <i>Begonia coptidifolia</i>    | KP751373 | -        | -        | - | - | - | -        |
| <i>Begonia cucurbitifolia</i>  | JF975969 | -        | -        | - | - | - | -        |
| <i>Begonia dawweishanensis</i> | JF975977 | -        | -        | - | - | - | -        |
| <i>Begonia decora</i>          | KF636435 | JF756355 | JF756439 | - | - | - | JF756523 |
| <i>Begonia dielsiana</i>       | KP710805 | -        | -        | - | - | - | -        |
| <i>Begonia dryadis</i>         | KF636436 | -        | -        | - | - | - | -        |
| <i>Begonia dux</i>             | -        | MH207137 | MH207546 | - | - | - | MH207960 |
| <i>Begonia edulis</i>          | GU176065 | KT599085 | -        | - | - | - | -        |
| <i>Begonia emeiensis</i>       | KP710816 | -        | -        | - | - | - | -        |
| <i>Begonia formosana</i>       | AJ491211 | -        | -        | - | - | - | -        |
| <i>Begonia griffithiana</i>    | KY088186 | MH207172 | MH207582 | - | - | - | MH207998 |
| <i>Begonia halconensis</i>     | AF485106 | -        | -        | - | - | - | -        |
| <i>Begonia handelii</i>        | KP710818 | KT599070 | MH207586 | - | - | - | MH208002 |
| <i>Begonia hatacoa</i>         | AF485111 | JF756354 | JF756438 | - | - | - | JF756522 |
| <i>Begonia hekouensis</i>      | JF976000 | -        | -        | - | - | - | -        |
| <i>Begonia hemsleyana</i>      | AB972929 | -        | KM281864 | - | - | - | -        |
| <i>Begonia koksunii</i>        | -        | MH207214 | MH207624 | - | - | - | MH208038 |
| <i>Begonia laminariae</i>      | KF636455 | -        | -        | - | - | - | -        |
| <i>Begonia lancangensis</i>    | AY048984 | -        | -        | - | - | - | -        |
| <i>Begonia limprichtii</i>     | -        | MH207223 | MH207633 | - | - | - | MH208047 |
| <i>Begonia longicarpa</i>      | AF485109 | -        | -        | - | - | - | -        |
| <i>Begonia longifolia</i>      | AF485105 | KT599061 | JF756452 | - | - | - | JF756536 |
| <i>Begonia lukuana</i>         | AJ491244 | -        | -        | - | - | - | -        |
| <i>Begonia macrotoma</i>       | KP710808 | -        | KM281863 | - | - | - | -        |
| <i>Begonia megalophyllaria</i> | JF976025 | -        | -        | - | - | - | -        |
| <i>Begonia multangula</i>      | AY753724 | JF756364 | JF756448 | - | - | - | JF756532 |
| <i>Begonia nantoensis</i>      | AJ491246 | -        | -        | - | - | - | -        |
| <i>Begonia nepalensis</i>      | AY753726 | MH207257 | MH207669 | - | - | - | MH208078 |
| <i>Begonia nuwakotensis</i>    | HQ729061 | -        | -        | - | - | - | -        |
| <i>Begonia obovoidea</i>       | -        | JF756386 | JF756470 | - | - | - | JF756554 |

|                              |          |          |          |          |          |          |          |
|------------------------------|----------|----------|----------|----------|----------|----------|----------|
| <i>Begonia oreodoxa</i>      | KF636467 | -        | -        | -        | -        | -        | -        |
| <i>Begonia palmata</i>       | AF485115 | KT599055 | JF756444 | -        | -        | -        | JF756528 |
| <i>Begonia pavonina</i>      | KF636472 | JF756356 | JF756440 | -        | -        | -        | JF756524 |
| <i>Begonia pedatifida</i>    | KT989484 | MK548114 | MH207700 | -        | -        | -        | MH208105 |
| <i>Begonia perakensis</i>    | -        | MH207291 | MH207704 | -        | -        | -        | MH208108 |
| <i>Begonia psilophylla</i>   | JF976040 | -        | -        | -        | -        | -        | -        |
| <i>Begonia pulchrifolia</i>  | KP710811 | -        | -        | -        | -        | -        | -        |
| <i>Begonia purpureofolia</i> | JF976041 | -        | -        | -        | -        | -        | -        |
| <i>Begonia rex</i>           | AF485096 | -        | -        | -        | -        | -        | -        |
| <i>Begonia rhoephila</i>     | -        | MH207331 | MH207745 | -        | -        | -        | MH208143 |
| <i>Begonia robusta</i>       | AY753729 | JF756363 | JF756447 | -        | -        | -        | JF756531 |
| <i>Begonia roxburghii</i>    | AY753730 | JF756371 | JF756455 | -        | -        | -        | JF756539 |
| <i>Begonia scottii</i>       | HQ729063 | MH207347 | MH207761 | -        | -        | -        | MH208160 |
| <i>Begonia setifolia</i>     | KP710827 | -        | -        | -        | -        | -        | -        |
| <i>Begonia sikkimensis</i>   | KF636485 | JF756359 | JF756443 | -        | -        | -        | JF756527 |
| <i>Begonia silletensis</i>   | AY048988 | JF756370 | JF756454 | -        | -        | -        | JF756538 |
| <i>Begonia sizemoreae</i>    | -        | JF756361 | JF756445 | -        | -        | -        | JF756529 |
| <i>Begonia taiwaniana</i>    | KF636488 | -        | -        | -        | -        | -        | -        |
| <i>Begonia teysmanniana</i>  | HQ729068 | -        | -        | -        | -        | -        | -        |
| <i>Begonia thomsonii</i>     | -        | MH207398 | MH207818 | -        | -        | -        | MH208210 |
| <i>Begonia tsaii</i>         | AY048990 | -        | -        | -        | -        | -        | -        |
| <i>Begonia venusta</i>       | -        | JF756357 | JF756441 | -        | -        | -        | JF756525 |
| <i>Begonia versicolor</i>    | AF485090 | JF756358 | JF756442 | -        | -        | -        | JF756526 |
| <i>Begonia villifolia</i>    | JF976055 | -        | -        | -        | -        | -        | -        |
| <i>Begonia xanthina</i>      | AY753733 | -        | -        | -        | -        | -        | -        |
| <i>Begonia albococcinea</i>  | -        | KR186447 | -        | KR186621 | KR186881 | KR186794 | KR186708 |
| <i>Begonia chingii</i>       | KP710820 | KT599093 | -        | -        | -        | -        | -        |
| <i>Begonia floccifera</i>    | -        | KR186466 | JF756427 | KR186640 | KR186900 | KR186813 | JF756511 |
| <i>Begonia henryi</i>        | KT989500 | -        | -        | -        | -        | -        | -        |
| <i>Begonia hymenophylla</i>  | -        | JF756382 | JF756466 | -        | -        | -        | JF756550 |
| <i>Begonia parvula</i>       | KP710821 | -        | -        | -        | -        | -        | -        |

|                                  |          |          |          |          |          |           |          |
|----------------------------------|----------|----------|----------|----------|----------|-----------|----------|
| <i>Begonia tenera</i>            | -        | MH207394 | MH207815 | -        | -        | -         | MH208206 |
| <i>Begonia kingiana</i>          | KF636451 | JF756374 | JF756458 | KR186653 | KR186913 | KR186826  | JF756542 |
| <i>Begonia speluncae</i>         | -        | MH207381 | MH207799 | -        | -        | -         | MH208192 |
| <i>Begonia arfakensis</i>        | -        | MH207044 | MH207454 | -        | -        | -         | MH207870 |
| <i>Begonia argenteomarginata</i> | -        | JF756417 | JF756501 | -        | -        | -         | JF756585 |
| <i>Begonia strigosa</i>          | -        | JF756416 | JF756500 | -        | -        | -         | JF756584 |
| <i>Begonia symsanguinea</i>      | -        | JF756415 | JF756499 | -        | -        | -         | JF756583 |
| <i>Begonia yapenensis</i>        | -        | MH207425 | MH207846 | -        | -        | -         | MH208233 |
| <i>Begonia puttii</i>            | HQ729025 | JF756387 | JF756471 | -        | -        | -         | JF756555 |
| <i>Begonia retinervia</i>        | KF636480 | -        | -        | -        | -        | -         | -        |
| <i>Begonia dregei</i>            | AF469125 | MH235380 | KP713174 | KR186635 | KR186895 | -         | KP713309 |
| <i>Begonia sutherlandii</i>      | AF485215 | JF756337 | JF756421 | KR186692 | KR186952 | KR186865. | JF756505 |

---

418 **Telemidae (Telemidae)**

| Species                       | H3       | Wnt      |
|-------------------------------|----------|----------|
| <i>Apneumonella jacobsoni</i> | MN706468 | -        |
| <i>Mekonglema bailing</i>     | MN706518 | MN706446 |
| <i>Mekonglema kaorao</i>      | MN706452 | MN706385 |
| <i>Mekonglema walayaku</i>    | MN706456 | MN706387 |
| <i>Mekonglema xinpingi</i>    | MN706504 | MN706432 |
| <i>Mekonglema yan</i>         | MN706455 | MN706386 |
| <i>Pimeloma cheni</i>         | MN706464 | MN706395 |
| <i>Pinelema adunca</i>        | MN706474 | MN706402 |
| <i>Pinelema bailongensis</i>  | MN706476 | MN706406 |
| <i>Pinelema bella</i>         | MN706494 | MN706421 |
| <i>Pinelema bifida</i>        | MN706470 | MN706404 |
| <i>Pinelema biyunensis</i>    | MN706497 | MN706424 |
| <i>Pinelema breviseta</i>     | MN706509 | MN706437 |
| <i>Pinelema circularis</i>    | MN706477 | MN706407 |
| <i>Pinelema conglobare</i>    | MN706478 | MN706408 |
| <i>Pinelema cordata</i>       | MN706475 | MN706405 |
| <i>Pinelema cucphongensis</i> | MN706479 | MN706409 |
| <i>Pinelema cucurbitina</i>   | MN706500 | MN706427 |
| <i>Pinelema cunfengensis</i>  | MN706465 | MN706396 |
| <i>Pinelema curcici</i>       | MN706485 | MN706414 |
| <i>Pinelema daguaiwan</i>     | MN706480 | MN706410 |
| <i>Pinelema damtaoensis</i>   | MN706515 | MN706443 |
| <i>Pinelema dengi</i>         | MN706491 | MN706417 |
| <i>Pinelema dongbei</i>       | MN706481 | MN706411 |
| <i>Pinelema exiloculata</i>   | MN706482 | MN706412 |
| <i>Pinelema feilong</i>       | MN706483 | MN706413 |
| <i>Pinelema grandidens</i>    | MN706487 | -        |
| <i>Pinelema huobaensis</i>    | MN706489 | MN706416 |
| <i>Pinelema huoyan</i>        | MN706463 | MN706394 |
| <i>Pinelema laensis</i>       | MN706513 | MN706441 |
| <i>Pinelema liangxi</i>       | MN706492 | MN706418 |
| <i>Pinelema lizhuang</i>      | MN706460 | MN706391 |
| <i>Pinelema mikrosphaira</i>  | MN706493 | MN706420 |
| <i>Pinelema nuocnutensis</i>  | MN706473 | MN706401 |
| <i>Pinelema oculata</i>       | MN706496 | MN706423 |
| <i>Pinelema pacchanensis</i>  | MN706512 | MN706440 |
| <i>Pinelema pedati</i>        | MN706499 | MN706426 |
| <i>Pinelema podiensis</i>     | MN706498 | MN706425 |
| <i>Pinelema qingfengensis</i> | MN706501 | MN706428 |
| <i>Pinelema renalis</i>       | MN706502 | MN706429 |
| <i>Pinelema shiba</i>         | MN706503 | MN706431 |
| <i>Pinelema spinafemora</i>   | MN706505 | MN706433 |
| <i>Pinelema spirae</i>        | MN706506 | MN706434 |

|                                |          |          |
|--------------------------------|----------|----------|
| <i>Pinelema spirulata</i>      | MN706514 | MN706442 |
| <i>Pinelema strentarsi</i>     | MN706507 | MN706435 |
| <i>Pinelema tham.</i>          | MN706486 | MN706419 |
| <i>Pinelema tortutheca</i>     | MN706511 | MN706439 |
| <i>Pinelema vesiculata</i>     | MN706516 | MN706444 |
| <i>Pinelema wangshang</i>      | MN706461 | MN706392 |
| <i>Pinelema wenyang</i>        | MN706517 | MN706445 |
| <i>Pinelema xiezi</i>          | MN706471 | MN706400 |
| <i>Pinelema xiushuiensis</i>   | MN706519 | MN706447 |
| <i>Pinelema yaosaensis</i>     | MN706495 | MN706422 |
| <i>Pinelema yashanensis</i>    | MN706520 | MN706448 |
| <i>Pinelema yunchuni</i>       | MN706462 | MN706393 |
| <i>Pinelema zhengzhuang</i>    | MN706472 | -        |
| <i>Pinelema zhewang</i>        | MN706521 | MN706449 |
| <i>Pinelema zonaria</i>        | MN706508 | MN706436 |
| <i>Segestria senoculata</i>    | MN706523 | MN706450 |
| <i>Segestria</i> sp.           | MN706524 | MN706451 |
| <i>Seychellia wiljoi</i>       | MN706453 | MN706383 |
| <i>Siamlema changhai</i>       | MN706466 | MN706397 |
| <i>Siamlema suea</i>           | MN706469 | MN706399 |
| <i>Sundalema anguina</i>       | MN706459 | MN706390 |
| <i>Sundalema bonjol</i>        | MN706458 | MN706389 |
| <i>Sundalema khaorakkiat</i>   | MN706467 | MN706398 |
| <i>Telema auricoma</i>         | MN706484 | MN706403 |
| <i>Telema guihua</i>           | MN706488 | MN706415 |
| <i>Telema tenella</i>          | MN706510 | MN706438 |
| <i>Telema wunderlich</i>       | MN706490 | -        |
| <i>Telemofila fabata</i>       | MN706522 | MN706430 |
| <i>Telemofila samosirensis</i> | MN706457 | MN706388 |
| <i>Zhuanlema peteri</i>        | MN706454 | MN706384 |
| <i>Althepus stonei</i>         | MH382313 | -        |
| <i>Althepus tibiatius</i>      | MH382315 | -        |
| <i>Dysdera spinidorsa</i>      | EU139708 | -        |
| <i>Dysdera ninnii</i>          | EU139735 | -        |
| <i>Kukulcania hibernalis</i>   | JX240303 | -        |
| <i>Opopaea</i> sp.             | KX298922 | -        |
| <i>Opopaea simoni</i>          | KX298924 | -        |
| <i>Calponia</i> sp.            | KX298958 | -        |
| <i>Loxosceles persica</i>      | MF467573 | -        |
| <i>Loxosceles rufescens</i>    | MH382326 | -        |
| <i>Pholcus</i> sp.             | MG269166 | JX023744 |
| <i>Flexicrurum</i> sp.         | MH382317 | -        |
| <i>Stedocys pagodas</i>        | KY018415 | -        |
| <i>Scytodes socialis</i>       | KX298918 | -        |

---

419 *Nesticella* (Nesticidae)

| Species                           | 16S      | 18S      | 28S      | <i>Actin 5c</i> | <i>COI</i> | <i>H3</i> |
|-----------------------------------|----------|----------|----------|-----------------|------------|-----------|
| <i>Nesticella aelleni</i>         | MG200472 | MG200649 | MG200754 | MG201351        | MG201003   | MG201180  |
| <i>Nesticella apiculata</i>       | MG200363 | MG200539 | MG200716 | MG201247        | MG200893   | MG201070  |
| <i>Nesticella arcuata</i>         | MG200426 | MG200621 | MG200843 | MG201323        | MG200975   | MG201152  |
| <i>Nesticella baiseensis</i>      | MG200392 | MG200565 | MG200802 | MG201271        | MG200919   | MG201096  |
| <i>Nesticella baobab</i>          | MG200470 | MG200647 | MG200753 | MG201349        | MG201001   | MG201178  |
| <i>Nesticella beccus</i>          | MG200455 | MG200632 | MG200736 | MG201334        | MG200986   | MG201163  |
| <i>Nesticella caeca</i>           | MG200414 | MG200588 | MG200820 | MG201294        | MG200942   | MG201119  |
| <i>Nesticella chongqing</i>       | MG200412 | MG200586 | MG200818 | MG201292        | MG200940   | MG201117  |
| <i>Nesticella connectens</i>      | MG200487 | MG200662 | MG200761 | MG201364        | MG201016   | MG201193  |
| <i>Nesticella dazhuangensis</i>   | MG200437 | MG200601 | MG200848 | MG201305        | MG200955   | MG201132  |
| <i>Nesticella falcata</i>         | MG200419 | MG200594 | MG200838 | MG201300        | MG200948   | MG201125  |
| <i>Nesticella fuliangensis</i>    | MG200361 | MG200533 | MG200704 | MG201241        | MG200887   | MG201064  |
| <i>Nesticella gazuida</i>         | MG200418 | MG200590 | MG200824 | MG201296        | MG200944   | MG201121  |
| <i>Nesticella gongshanensis</i>   | MG200505 | MG200682 | MG200786 | MG201384        | MG201036   | MG201213  |
| <i>Nesticella gracilentia</i>     | MG200447 | MG200614 | MG200831 | MG201316        | MG200968   | MG201145  |
| <i>Nesticella griswoldi</i>       | MG200468 | MG200645 | MG200752 | MG201347        | MG200999   | MG201176  |
| <i>Nesticella hongheensis</i>     | MG200429 | MG200605 | MG200854 | MG201309        | MG200959   | MG201136  |
| <i>Nesticella huomachongensis</i> | MG200356 | MG200531 | MG200709 | MG201239        | MG200885   | MG201062  |
| <i>Nesticella jingpo</i>          | -        | MG200607 | MG200851 | MG201311        | MG200961   | MG201138  |
| <i>Nesticella kaohsiungensis</i>  | MG200435 | MG200627 | MG200788 | MG201329        | MG200981   | MG201158  |
| <i>Nesticella laotica</i>         | MG200486 | MG200660 | MG200759 | MG201362        | MG201014   | MG201191  |
| <i>Nesticella liuzhaiensis</i>    | MG200421 | MG200596 | MG200840 | -               | MG200950   | MG201127  |
| <i>Nesticella mogera175</i>       | MG200382 | MG200554 | MG200724 | MG201262        | MG200908   | MG201085  |
| <i>Nesticella mogera427</i>       | MG200379 | MG200550 | MG200720 | MG201258        | MG200904   | MG201081  |
| <i>Nesticella nandanensis</i>     | MG200396 | MG200578 | MG200797 | MG201284        | MG200932   | MG201109  |
| <i>Nesticella nepalensis</i>      | MG200498 | MG200674 | MG200767 | MG201376        | MG201028   | MG201205  |
| <i>Nesticella odonta</i>          | MG200406 | MG200580 | MG200812 | MG201286        | MG200934   | MG201111  |
| <i>Nesticella phami</i>           | MG200508 | MG200629 | MG200860 | MG201331        | MG200983   | MG201160  |



|                                  |          |          |          |          |          |          |
|----------------------------------|----------|----------|----------|----------|----------|----------|
| <i>Nesticella potala</i>         | MG200479 | MG200675 | MG200749 | MG201377 | MG201029 | MG201206 |
| <i>Nesticella qiaoqiensis</i>    | MG200448 | MG200615 | MG200832 | MG201317 | MG200969 | MG201146 |
| <i>Nesticella qiongensis</i>     | MG200422 | MG200593 | MG200837 | MG201299 | MG200947 | MG201124 |
| <i>Nesticella quelpartensis</i>  | JN816452 | JN816673 | -        | -        | JN817085 | -        |
| <i>Nesticella sanchaheensis</i>  | MG200413 | MG200587 | MG200819 | MG201293 | MG200941 | MG201118 |
| <i>Nesticella semicircularis</i> | MG200416 | MG200591 | MG200822 | MG201297 | MG200945 | MG201122 |
| <i>Nesticella shanlinensis</i>   | MG200441 | MG200608 | MG200825 | MG201312 | MG200962 | MG201139 |
| <i>Nesticella songi</i>          | MG200385 | MG200559 | MG200791 | MG201265 | MG200913 | MG201090 |
| <i>Nesticella</i> sp.178         | MG200469 | MG200646 | MG200751 | MG201348 | MG201000 | MG201177 |
| <i>Nesticella</i> sp.293         | MG200415 | MG200592 | MG200821 | MG201298 | MG200946 | MG201123 |
| <i>Nesticella sulawesi</i>       | MG200477 | MG200658 | MG200772 | MG201360 | MG201012 | MG201189 |
| <i>Nesticella sumatrana</i>      | MG200453 | MG200683 | MG200857 | MG201385 | MG201037 | MG201214 |
| <i>Nesticella tibetana</i>       | MG200495 | MG200656 | MG200770 | MG201358 | MG201010 | MG201187 |
| <i>Nesticella vanlang</i>        | MG200471 | MG200648 | MG200748 | MG201350 | MG201002 | MG201179 |
| <i>Nesticella verticalis</i>     | MG200402 | MG200568 | MG200805 | MG201274 | MG200922 | MG201099 |
| <i>Nesticella wanzaiensis</i>    | MG200366 | MG200536 | MG200711 | MG201244 | MG200890 | MG201067 |
| <i>Nesticella xixia</i>          | MG200451 | MG200618 | MG200835 | MG201320 | MG200972 | MG201149 |
| <i>Nesticella yanbeiensis</i>    | MG200352 | MG200523 | MG200700 | MG201231 | MG200877 | MG201054 |
| <i>Nesticella yao</i>            | MG200405 | MG200574 | MG200811 | MG201280 | MG200928 | MG201105 |
| <i>Nesticella yui</i>            | MG200500 | MG200677 | MG200782 | MG201379 | MG201031 | MG201208 |
| <i>Nesticella zhiyuani</i>       | MG200481 | MG200669 | MG200775 | MG201371 | MG201023 | MG201200 |
| <i>Nesticella brevipes</i>       | -        | KF359244 | KF359345 | -        | KF359043 | KF359136 |
| <i>Nesticella robusta</i>        | -        | -        | -        | -        | KX866957 | -        |
| <i>Nesticus cellulanus</i>       | MG200513 | MG200690 | MG200866 | MG201392 | MG201044 | MG201221 |
| <i>Pimoa altioculara</i>         | KC849144 | KC848947 | KC849019 | -        | KP655054 | KC849060 |
| <i>Pimoa haden</i>               | GU338640 | GU338524 | GU338587 | -        | EF128155 | -        |
| <i>Pimoa rupicola</i>            | MG200518 | MG200697 | MG200876 | MG201398 | MG201051 | MG201228 |
| <i>Speleoticus navicellatus</i>  | MG200515 | MG200692 | MG200870 | MG201393 | MG201046 | MG201223 |
| <i>Speleoticus</i> sp.ZA34       | MG200519 | MG200693 | MG200874 | MG201394 | MG201047 | MG201224 |
| <i>Speleoticus uenoi</i>         | MG200516 | MG200694 | MG200871 | MG201395 | MG201048 | MG201225 |
| <i>Typhlonesticus idriacus</i>   | MG200521 | MG200696 | MG200867 | MG201397 | MG201050 | MG201227 |

|                                        |          |          |          |          |          |          |
|----------------------------------------|----------|----------|----------|----------|----------|----------|
| <i>Weintrauboa yele</i>                | GU338641 | GU338523 | GU338588 | -        | GU338698 | -        |
| <i>Wraios longiembolus</i>             | MG200510 | MG200685 | MG200861 | MG201387 | MG201041 | MG201216 |
| <i>Carpathonesticus racovitzai</i>     | MG200514 | MG200691 | MG200865 | -        | MG201045 | MG201222 |
| <i>Centromerus trilobus</i>            | KT003108 | GU338468 | GU338571 | -        | GU338656 | KT002817 |
| <i>Cyclocarcina floronoides tatoro</i> | MG200520 | MG200695 | MG200869 | MG201396 | MG201049 | MG201226 |
| <i>Diplostyla concolor</i>             | FJ838673 | GU338467 | GU338585 | -        | GU338697 | FJ838743 |
| <i>Hamus bowoensis</i>                 | MG200511 | MG200688 | MG200872 | MG201390 | MG201042 | MG201219 |
| <i>Kryptonesticus eremita</i>          | MG200512 | MG200689 | MG200868 | MG201391 | MG201043 | MG201220 |
| <i>Labulla thoracica</i>               | MG200517 | MG200698 | MG200875 | MG201399 | MG201052 | MG201229 |
| <i>Linyphia triangularis</i>           | EU333944 | EU003390 | -        | -        | FR775771 | AY078702 |
| <i>Meioneta nigra</i>                  | GU338608 | GU338504 | GU338577 | -        | GU338662 | -        |
| <i>Nanoa enana</i>                     | -        | JN010184 | JN010189 | -        | JN010203 | -        |
| <i>Nerienne macella</i>                | MG200522 | MG200699 | MG200873 | MG201400 | MG201053 | MG201230 |

---

420 *Troglocoelotes* (Agelenidae)

| Species                               | 12S      | 16S      | 18S      | 28S      | <i>CoxI</i> | <i>H3</i> | <i>NadI</i> | <i>Wnt</i> |
|---------------------------------------|----------|----------|----------|----------|-------------|-----------|-------------|------------|
| <i>Troglocoelotes bailongensis</i>    | KY791826 | KY791527 | KY791226 | KY790928 | KY778814    | KY779071  | KY790640    | KY779365   |
| <i>Troglocoelotes banmenensis</i>     | KY791833 | KY791534 | KY791233 | KY790935 | KY778821    | KY779078  | KY790646    | KY779370   |
| <i>Troglocoelotes liangensis</i>      | KY791831 | KY791532 | KY791231 | KY790933 | KY778819    | KY779076  | KY790644    | KY779368   |
| <i>Troglocoelotes nongchiensis</i>    | KY791827 | KY791528 | KY791227 | KY790929 | KY778815    | KY779072  | KY790641    | KY779366   |
| <i>Troglocoelotes qixianensis</i>     | KY791828 | KY791529 | KY791228 | KY790930 | KY778816    | KY779073  | KY790642    | -          |
| <i>Troglocoelotes tortus</i>          | KY791834 | KY791535 | KY791234 | KY790936 | KY778822    | KY779079  | KY790647    | KY779371   |
| <i>Troglocoelotes yumiganensis</i>    | KY791832 | KY791533 | KY791232 | KY790934 | KY778820    | KY779077  | KY790645    | KY779369   |
| <i>Notiocoelotes orbiculatus</i>      | KY791808 | KY791509 | KY791208 | KY790910 | KY778798    | KY779053  | -           | KY779350   |
| <i>Notiocoelotes pseudolingulatus</i> | KY791810 | KY791511 | KY791210 | KY790912 | KY778800    | KY779055  | KY790628    | KY779352   |
| <i>Notiocoelotes sparus</i>           | KY791811 | KY791512 | KY791211 | KY790913 | KY778801    | KY779056  | KY790629    | KY779353   |
| <i>Notiocoelotes lingulatus</i>       | KY791807 | KY791508 | KY791207 | KY790909 | KY778797    | KY779052  | -           | KY779349   |
| <i>Bifidocoelotes</i> sp.             | KY791815 | KY791516 | KY791215 | KY790917 | KY778803    | KY779060  | KY790630    | KY779357   |

421 *Notiocoelotes* (Agelenidae)

| Species                               | 12S      | 16S      | 18S      | 28S      | <i>CoxI</i> | <i>H3</i> | <i>NadI</i> | <i>Wnt</i> |
|---------------------------------------|----------|----------|----------|----------|-------------|-----------|-------------|------------|
| <i>Notiocoelotes maoganensis</i>      | KY791812 | KY791513 | KY791212 | KY790914 | KU886075    | KY779057  | -           | KY779354   |
| <i>Notiocoelotes palinitropus</i>     | KY791809 | KY791510 | KY791209 | KY790911 | KY778799    | KY779054  | KY790627    | KY779351   |
| <i>Notiocoelotes orbiculatus</i>      | KY791808 | KY791509 | KY791208 | KY790910 | KY778798    | KY779053  | -           | KY779350   |
| <i>Notiocoelotes pseudolingulatus</i> | KY791810 | KY791511 | KY791210 | KY790912 | KY778800    | KY779055  | KY790628    | KY779352   |
| <i>Notiocoelotes sparus</i>           | KY791811 | KY791512 | KY791211 | KY790913 | KY778801    | KY779056  | KY790629    | KY779353   |
| <i>Notiocoelotes qionghongensis</i>   | KY791813 | KY791514 | KY791213 | KY790915 | KU886074    | KY779058  | -           | KY779355   |
| <i>Notiocoelotes lingulatus</i>       | KY791807 | KY791508 | KY791207 | KY790909 | KY778797    | KY779052  | -           | KY779349   |
| <i>Draconarius simplicidens</i>       | KY791805 | KY791506 | KY791205 | KY790907 | KY778795    | KY779050  | KY790625    | KY779347   |

422 *Protobothrops* (Viperidae)

| Species                              | 12S      | 16S      | Cytb     | ND4      |
|--------------------------------------|----------|----------|----------|----------|
| <i>Protobothrops cornutus</i>        | AY294276 | AY294267 | AY294272 | AY294262 |
| <i>Protobothrops dabieshanensis</i>  | NC022473 | NC022473 | NC022473 | NC022473 |
| <i>Protobothrops elegans</i>         | AF057201 | AF057248 | AY223575 | U41893   |
| <i>Protobothrops flavoviridis</i>    | AY352792 | AY352730 | AY223574 | AY352826 |
| <i>Protobothrops himalayanus</i>     | KT220270 | KT220289 | KT220308 | KT220328 |
| <i>Protobothrops jerdonii</i>        | AY763180 | AY763199 | HM567474 | EU810020 |
| <i>Protobothrops kaulbacki</i>       | DQ666056 | DQ666055 | DQ666060 | DQ666057 |
| <i>Protobothrops mangshanensis</i>   | AY352787 | AY352726 | AY352758 | AY352821 |
| <i>Protobothrops maolanensis</i>     | JN799405 | JN799398 | JN799401 | JN799409 |
| <i>Protobothrops mucrosquamatus</i>  | AY223653 | AY223666 | AY223577 | AY223629 |
| <i>Protobothrops tokarensis</i>      | AF057202 | AF057249 | AY223576 | AY223628 |
| <i>Protobothrops trungkhanhensis</i> | KT220284 | KT220303 | KT220323 | KT220343 |
| <i>Protobothrops xiangchengensis</i> | AY763188 | AY763207 | DQ666061 | DQ666058 |
| <i>Protobothrops sieversorum</i>     | DQ305414 | DQ305437 | AY352753 | DQ305478 |
| <i>Ovophis monticola</i>             | HQ325260 | HQ325078 | HQ325138 | HQ325199 |
| <i>Ovophis makazayazaya</i>          | HQ325266 | HQ325084 | HQ325143 | HQ325202 |
| <i>Ovophis convictus</i>             | HQ325264 | HQ325082 | HQ325129 | HQ325190 |
| <i>Ovophis okinavensis</i>           | AF057199 | AF057246 | AY223573 | U41895   |
| <i>Ovophis tonkinensis</i>           | HQ325308 | HQ325121 | HQ325181 | HQ325243 |
| <i>Ovophis zayuensis</i>             | HQ325273 | HQ325089 | HQ325150 | HQ325208 |
| <i>Gloydus blomhoffi</i>             | AY352780 | AY352719 | AY352751 | AY352814 |
| <i>Gloydus brevicaudus</i>           | AY352781 | AY352720 | AY352752 | AY352815 |
| <i>Gloydus halys</i>                 | KY040526 | KY040558 | KX063802 | KX063775 |
| <i>Gloydus intermedius</i>           | KY040524 | KY040556 | KY040617 | KY040638 |
| <i>Gloydus stejneri</i>              | KY040536 | KY040568 | KX063817 | KX063790 |
| <i>Gloydus cognatus</i>              | KY040529 | KY040561 | KY040619 | KY040640 |
| <i>Gloydus liupanensis</i>           | EF012814 | -        | JQ687491 | JQ687472 |
| <i>Gloydus qinglinensis</i>          | KY040534 | KY040566 | KY040623 | KY040644 |
| <i>Gloydus changdaoensis</i>         | KY040521 | KY040553 | KX063821 | KX063794 |
| <i>Gloydus shedaoensis</i>           | AF057194 | AF057241 | AY223566 | AY223623 |
| <i>Gloydus huangi</i>                | MK227409 | MK227412 | MK227415 | MK227418 |
| <i>Gloydus strauchi</i>              | KY040543 | KY040575 | KY040629 | KY040650 |
| <i>Gloydus monticola</i>             | KY040550 | KY040582 | KY040636 | JX661243 |
| <i>Gloydus rubromaculatus</i>        | KY040548 | KY040580 | KY040634 | KY040655 |
| <i>Gloydus angusticep</i>            | KY040540 | KY040572 | KY040626 | KY040647 |
| <i>Gloydus tsushimaensis</i>         | JN870186 | JN870196 | JN870203 | JN870211 |
| <i>Gloydus ussuriensis</i>           | AF057193 | AF057240 | AY223565 | AY223622 |

423 *Elaphe* (Colubridae)

| Species                            | 12S      | 16S      | <i>Cytb</i> | <i>ND4</i> | <i>ND2</i> | <i>C-mos</i> |
|------------------------------------|----------|----------|-------------|------------|------------|--------------|
| <i>Elaphe bimaculata</i>           | AY122767 | -        | DQ902104    | DQ902283   | DQ902210   | DQ902062     |
| <i>Elaphe cantoris</i>             | AY122769 | DQ902135 | DQ902315    | DQ902246   |            | DQ902095     |
| <i>Elaphe carinata</i>             | AY122839 | HM439983 | DQ902133    | DQ902284   | DQ902211   | DQ902063     |
| <i>Elaphe climacophora</i>         | AY122772 | -        | DQ902105    | DQ902285   | DQ902212   | DQ902064     |
| <i>Elaphe davidi</i>               | AY122775 | -        | -           | -          | -          | -            |
| <i>Elaphe dione</i>                | AF236673 | -        | DQ902107    | DQ902287   | DQ902214   | DQ902066     |
| <i>Elaphe hodgsoni</i>             | -        | -        | DQ902136    | DQ902318   | DQ902247   | DQ902096     |
| <i>Elaphe moellendorffi</i>        | AY122786 | DQ902116 | DQ902295    | DQ902223   |            | DQ902074     |
| <i>Elaphe quadrivirgata</i>        | AY122793 | -        | DQ902120    | DQ902300   | DQ902228   | DQ902078     |
| <i>Elaphe quatuorlineata</i>       | AY122796 | AF215267 | AY486931    | AY487067   | AY487028   | AY486955     |
| <i>Elaphe sauromates</i>           | AY122797 | -        | -           | -          | -          | -            |
| <i>Elaphe schrenckii</i>           | AF236672 | -        | JQ798790    | DQ902302   | DQ902233   | DQ902082     |
| <i>Elaphe taeniura</i>             | AY122807 | HM439981 | EF076709    | EF076708   | EF076707   | EF076705     |
| <i>Oreocryptophis porphyraceus</i> | NC012770 | NC012770 | DQ902118    | DQ902298   | NC012770   | DQ902076     |
| <i>Archelaphe bella</i>            | -        | -        | DQ902134    | DQ902316   | DQ902248   | DQ902097     |

424 *Odorrana* (Ranidae)

| Species                         | 12S      | 16S      | COI      | Cytb     | ND3      | ND2      | RAG1     | Tyr      |
|---------------------------------|----------|----------|----------|----------|----------|----------|----------|----------|
| <i>Odorrana absita</i>          | -        | EU861542 | -        | -        | EU861516 | EU861568 | EF088245 | EU076768 |
| <i>Odorrana amamiensis</i>      | AB200923 | AB200947 | -        | -        | -        | -        | -        | -        |
| <i>Odorrana andersonii</i>      | DQ359965 | KF185057 | JN700826 | KR264154 | KF771312 | -        | KR264387 | KR264455 |
| <i>Odorrana anlungensis</i>     | KF185013 | KF185049 | -        | -        | -        | -        | -        | -        |
| <i>Odorrana aureola</i>         | -        | DQ650568 | -        | -        | DQ650437 | DQ650504 | -        | -        |
| <i>Odorrana bacboensis</i>      | -        | DQ650569 | -        | -        | -        | -        | -        | -        |
| <i>Odorrana banaorum</i>        | -        | DQ650586 | -        | -        | DQ650455 | DQ650522 | -        | -        |
| <i>Odorrana chapaensis</i>      | DQ204431 | KX893901 | KR087835 | -        | EU861527 | EU861579 | EF088255 | EU076778 |
| <i>Odorrana chloronota</i>      | DQ283394 | DQ283394 | -        | -        | -        | -        | -        | -        |
| <i>Odorrana exiliversabilis</i> | KF185020 | KF185056 | -        | -        | -        | -        | -        | -        |
| <i>Odorrana fengkaiensis</i>    | KT315354 | KT315375 | -        | -        | -        | -        | -        | -        |
| <i>Odorrana geminata</i>        | -        | EU861546 | -        | -        | EU861520 | EU861572 | -        | -        |
| <i>Odorrana graminea</i>        | KF185002 | KF185038 | -        | -        | -        | -        | -        | -        |
| <i>Odorrana hainanensis</i>     | NC034984 | NC034984 | NC034984 | NC034984 | NC034984 | NC034984 | KU840725 | -        |
| <i>Odorrana hejiangensis</i>    | KF185016 | KF185052 | -        | -        | -        | -        | -        | -        |
| <i>Odorrana hosii</i>           | KU840535 | MG935960 | MG935666 | KR264179 | DQ650471 | DQ650539 | KU840732 | KU840785 |
| <i>Odorrana huanggangensis</i>  | KF185023 | KF185059 | -        | -        | -        | -        | -        | -        |
| <i>Odorrana ishikawae</i>       | AB511282 | AB511282 | AB511282 | AB511282 | AB511282 | AB511282 | -        | -        |
| <i>Odorrana jingdongensis</i>   | KF185014 | KF185050 | KR087840 | -        | -        | -        | -        | -        |
| <i>Odorrana jingdongensis</i>   | -        | FJ417120 | -        | -        | FJ417218 | FJ417169 | EF088258 | EU076781 |
| <i>Odorrana junlianensis</i>    | KF185022 | KF185058 | -        | -        | -        | -        | -        | -        |
| <i>Odorrana kuangwuensis</i>    | KF184998 | KF185034 | -        | -        | -        | -        | -        | -        |
| <i>Odorrana leporipes</i>       | KF185000 | KF185036 | -        | -        | -        | -        | -        | -        |
| <i>Odorrana lipuensis</i>       | -        | KM388699 | -        | -        | -        | -        | -        | -        |
| <i>Odorrana livida</i>          | -        | DQ650615 | -        | -        | -        | -        | -        | -        |
| <i>Odorrana lungshengensis</i>  | KF185018 | KF185054 | -        | -        | -        | -        | -        | -        |
| <i>Odorrana margaretae</i>      | KT315371 | EU861566 | KR087843 | KU217312 | EU861540 | EU861592 | EF088261 | EU076785 |

|                                    |          |          |          |          |          |          |          |          |
|------------------------------------|----------|----------|----------|----------|----------|----------|----------|----------|
| <i>Odorrana morafkai</i>           | KU840526 | DQ650632 | -        | -        | DQ650498 | DQ650562 | EF088263 | EU076787 |
| <i>Odorrana mutschmanni</i>        | KU356761 | KU356765 | -        | -        | -        | -        | -        | -        |
| <i>Odorrana nanjiangensis</i>      | KF185006 | KF185042 | -        | -        | -        | -        | -        | -        |
| <i>Odorrana narina</i>             | AB511287 | AB511287 | -        | -        | -        | -        | -        | -        |
| <i>Odorrana nasica</i>             | DQ283345 | DQ283345 | -        | -        | -        | -        | -        | -        |
| <i>Odorrana nasuta</i>             | KF185017 | KF185053 | -        | -        | -        | -        | -        | -        |
| <i>Odorrana schmackeri</i>         | KF185011 | KF185047 | KP732086 | KP732086 | KP732086 | KP732086 | -        | -        |
| <i>Odorrana supranarina</i>        | AB200926 | AB200950 | -        | -        | -        | -        | -        | -        |
| <i>Odorrana swinhoana</i>          | AB200929 | AB200953 | -        | -        | -        | -        | -        | -        |
| <i>Odorrana tianmuyi</i>           | KF185004 | KF185040 | -        | -        | -        | -        | -        | -        |
| <i>Odorrana tiannanensis</i>       | EF453736 | EF453751 | KR087851 | -        | -        | -        | -        | -        |
| <i>Odorrana tormota</i>            | DQ835616 | DQ835616 | DQ835616 | DQ835616 | DQ835616 | DQ835616 | EU076750 | EU076766 |
| <i>Odorrana<br/>utsunomiyaorum</i> | AB200928 | AB200952 | -        | -        | -        | -        | -        | -        |
| <i>Odorrana versabilis</i>         | KF185019 | KF185055 | -        | -        | -        | -        | -        | -        |
| <i>Odorrana wuchuanensis</i>       | KF185007 | KF185043 | KU680791 | KU680791 | KU680791 | KU680791 | -        | -        |
| <i>Odorrana yizhangensis</i>       | KF185012 | KF185048 | -        | -        | -        | -        | -        | -        |
| <i>Rana catesbeianus</i>           | NC022696 | NC022696 | NC022696 | NC022696 | NC022696 | NC022696 | AB612037 | AB612039 |
| <i>Rana kukunoris</i>              | KX269185 | KX269185 | NC035804 | KX269332 | NC035804 | KX269401 | KX269550 | KX269778 |
| <i>Rana pipiens</i>                | Y10945   | X86284   | EF525892 | KM396244 | -        | -        | -        | EU769542 |
| <i>Rana septentrionalis</i>        | KX269179 | KX269179 | EF525899 | AY083273 | -        | AY206487 | KX269529 | KX269757 |
| <i>Rana temporaria</i>             | AB058864 | AB058882 | KP697915 | MF624355 | -        | AF314018 | AY323776 | KC800261 |
| <i>Rana tlaloci</i>                | AY779234 | AY779234 | -        | KX269323 | -        | KX269393 | KX269540 | KX269768 |
| <i>Pseudorana weiningensis</i>     | KX269217 | DQ359996 | -        | KX269362 | -        | KX269432 | KX269582 | DQ360050 |



425 ***Bibarba* (Cobitidae)**

| Species                           | <i>Cytb</i> |
|-----------------------------------|-------------|
| <i>Bibarba bibarba</i>            | KT585706    |
| <i>Bibarba parvovulus</i>         | KT585698    |
| <i>Acantopsis choirorhynchos</i>  | AB242161    |
| <i>Canthophrys gongota</i>        | NC031576    |
| <i>Cobitis biwae</i>              | NC027663    |
| <i>Cobitis lutheri</i>            | NC022717    |
| <i>Iksookimia longicorpa</i>      | NC027850    |
| <i>Kichulchoia multifasciata</i>  | AP011337    |
| <i>Koreocobitis naktongensis</i>  | HM535625    |
| <i>Kottelatlimia pristis</i>      | NC031597    |
| <i>Lepidocephalichthys guntea</i> | NC031593    |
| <i>Lepidocephalus macrochir</i>   | NC031596    |
| <i>Misgurnus mohoity</i>          | KF386025    |
| <i>Niwaella delicata</i>          | AP009308    |
| <i>Pangio anguillaris</i>         | AB242168    |
| <i>Pangio kuhlii</i>              | NC031599    |
| <i>Sinorhodeus microlepis</i>     | MH190825    |
| <i>Rhodeus shitaiensis</i>        | KF176560    |

426

| Species                             | COI      | Cytb     |
|-------------------------------------|----------|----------|
| <i>Oreonectes jiarongensis</i>      | KU987437 | KU987437 |
| <i>Oreonectes platycephalus</i>     | DQ105197 | DQ105197 |
| <i>Oreonectes shuilongensis</i>     | KF640641 | KF640641 |
| <i>Oreonectes daqikongensis</i>     | KU987436 | KU987436 |
| <i>Oreonectes furcocaudalis</i>     | NC032384 | NC032384 |
| <i>Aborichthys elongatus</i>        | NC031582 | NC031582 |
| <i>Acanthocobitis botia</i>         | NC033958 | NC033958 |
| <i>Barbatula nuda</i>               | NC022858 | NC022858 |
| <i>Barbatula toni</i>               | KM405199 | KM405199 |
| <i>Carpiodes carpio</i>             | -        | AY366087 |
| <i>Cobitis choii</i>                | -        | NC010649 |
| <i>Cobitis elongatoides</i>         | -        | NC023947 |
| <i>Cobitis lutheri</i>              | -        | NC022717 |
| <i>Cobitis sinensis</i>             | AY526868 | AY526868 |
| <i>Homatula potanini</i>            | NC025321 | NC025321 |
| <i>Homatula variegatus</i>          | NC020095 | NC020095 |
| <i>Jinshaia sinensis</i>            | -        | KJ739867 |
| <i>Koreocobitis naktongensis</i>    | -        | NC015798 |
| <i>Leptobotia taeniops</i>          | -        | KM386686 |
| <i>Micronemacheilus pulcher</i>     | NC031581 | NC031581 |
| <i>Misgurnus nikolskyi</i>          | -        | NC008678 |
| <i>Myxocyprinus asiaticus</i>       | -        | AP006764 |
| <i>Parabotia fasciata</i>           | -        | KM393223 |
| <i>Schistura balteata</i>           | AB242172 | AB242172 |
| <i>Schistura jarutanini</i>         | NC031584 | NC031584 |
| <i>Sinogastromyzon sichangensis</i> | KF711948 | KF711948 |
| <i>Triplophysa aliensis</i>         | KT213584 | KT213584 |
| <i>Triplophysa anterodorsalis</i>   | NC024597 | NC024597 |
| <i>Triplophysa dalaica</i>          | KT213590 | KT213590 |
| <i>Triplophysa hsutschouensis</i>   | KT213592 | KT213592 |
| <i>Triplophysa leptosoma</i>        | KT213593 | KT213593 |
| <i>Triplophysa lixianensis</i>      | NC030521 | NC030521 |
| <i>Triplophysa markehenensis</i>    | KT213594 | KT213594 |
| <i>Triplophysa minxianensis</i>     | KT213596 | KT213596 |
| <i>Triplophysa orientalis</i>       | NC030505 | NC030505 |
| <i>Triplophysa pappenheimi</i>      | KY419201 | KY419201 |
| <i>Triplophysa pseudostenura</i>    | KT213601 | KT213601 |
| <i>Triplophysa rosa</i>             | NC019587 | NC019587 |
| <i>Triplophysa scleroptera</i>      | KT213602 | KT213602 |
| <i>Triplophysa siluroides</i>       | NC024611 | NC024611 |
| <i>Triplophysa stoliczkai</i>       | NC017890 | NC017890 |
| <i>Triplophysa tenuis</i>           | KT224363 | KT224363 |
| <i>Triplophysa tibetana</i>         | KM212178 | KM212178 |
| <i>Triplophysa wuweiensis</i>       | KT224365 | KT224365 |
| <i>Triplophysa xichangensis</i>     | KT224366 | KT224366 |

429 *Triplophysa* (Nemacheilidae)

| Species                              | COI      | Cytb     |
|--------------------------------------|----------|----------|
| <i>Triplophysa aliensis</i>          | KT213584 | KT213584 |
| <i>Triplophysa anterodorsalis</i>    | NC024597 | NC024597 |
| <i>Triplophysa baotianensis</i>      | -        | MK610353 |
| <i>Triplophysa bleekeri</i>          | JX135578 | JX135578 |
| <i>Triplophysa breviparba</i>        | KY971608 | KY971608 |
| <i>Triplophysa brevicauda</i>        | KT213588 | KT213588 |
| <i>Triplophysa chondrostoma</i>      | KT213589 | KT213589 |
| <i>Triplophysa dalaica</i>           | KT213590 | KT213590 |
| <i>Triplophysa daqiaoensis</i>       | KU557970 | -        |
| <i>Triplophysa dorsalis</i>          | KT241024 | KT241024 |
| <i>Triplophysa fengshanensis</i>     | MK204566 | -        |
| <i>Triplophysa grahami</i>           | -        | MK608125 |
| <i>Triplophysa gundriseri</i>        | KX039656 | -        |
| <i>Triplophysa hsutschouensis</i>    | KT213592 | KT213592 |
| <i>Triplophysa kashmirensis</i>      | MK804126 | -        |
| <i>Triplophysa labiata</i>           | KT192057 | KT192057 |
| <i>Triplophysa leptosoma</i>         | KT213593 | KT213593 |
| <i>Triplophysa lixianensis</i>       | NC030521 | NC030521 |
| <i>Triplophysa longipectoralis</i>   | MK204568 | -        |
| <i>Triplophysa longiensis</i>        | MK204567 | MW582825 |
| <i>Triplophysa markehenensis</i>     | KT213594 | KT213594 |
| <i>Triplophysa microps</i>           | KT213595 | KT213595 |
| <i>Triplophysa minxianensis</i>      | KT213596 | KT213596 |
| <i>Triplophysa moquensis</i>         | KT213597 | KT213597 |
| <i>Triplophysa nandanensis</i>       | MK204570 | MW582824 |
| <i>Triplophysa nanpanjiangensis</i>  | KU558006 | -        |
| <i>Triplophysa nasobarbatula</i>     | MK204569 | MK610357 |
| <i>Triplophysa nujiangensa</i>       | KT213598 | KT213598 |
| <i>Triplophysa orientalis</i>        | NC030505 | NC030505 |
| <i>Triplophysa pappenheimi</i>       | KY419201 | KY419201 |
| <i>Triplophysa polyfasciata</i>      | KU558040 | KX373848 |
| <i>Triplophysa pseudoscleroptera</i> | KU587513 | KU587513 |
| <i>Triplophysa pseudostenura</i>     | KT213601 | KT213601 |
| <i>Triplophysa robusta</i>           | KM396312 | KM396312 |
| <i>Triplophysa rosa</i>              | NC019587 | NC019587 |
| <i>Triplophysa rotundiventris</i>    | -        | MG725402 |
| <i>Triplophysa sanduensis</i>        | MH509738 | MW582822 |
| <i>Triplophysa scleroptera</i>       | KT213602 | KT213602 |
| <i>Triplophysa sellaefer</i>         | MN896310 | MN896570 |
| <i>Triplophysa sewerzowi</i>         | KX039658 | -        |
| <i>Triplophysa siluroides</i>        | NC024611 | NC024611 |
| <i>Triplophysa stenura</i>           | NC032692 | NC032692 |
| <i>Triplophysa stewarti</i>          | KT213605 | KT213605 |
| <i>Triplophysa stoliczkai</i>        | NC017890 | NC017890 |
| <i>Triplophysa strauchii</i>         | KP297875 | KP297875 |
| <i>Triplophysa tenuis</i>            | KT224363 | KT224363 |

|                                     |          |          |
|-------------------------------------|----------|----------|
| <i>Triplophysa tianeensis</i>       | MK204571 | MW582826 |
| <i>Triplophysa tibetana</i>         | KM212178 | KM212178 |
| <i>Triplophysa ulacholica</i>       | KT259194 | KT259194 |
| <i>Triplophysa venusta</i>          | KT008666 | KT008666 |
| <i>Triplophysa weiheensis</i>       | -        | KY781400 |
| <i>Triplophysa wulongensis</i>      | -        | MW582823 |
| <i>Triplophysa wuweiensis</i>       | KT224365 | KT224365 |
| <i>Triplophysa xiangxiensis</i>     | KT751089 | KT751089 |
| <i>Triplophysa xichangensis</i>     | KT224366 | KT224366 |
| <i>Triplophysa yaopeizhii</i>       | KU558127 | -        |
| <i>Aborichthys elongatus</i>        | NC031582 | NC031582 |
| <i>Acanthocobitis botia</i>         | NC033958 | NC033958 |
| <i>Barbatula nuda</i>               | NC022858 | NC022858 |
| <i>Barbatula toni</i>               | KM405199 | KM405199 |
| <i>Carpiodes carpio</i>             | -        | AY366087 |
| <i>Cobitis choii</i>                | -        | NC010649 |
| <i>Cobitis elongatoides</i>         | -        | NC023947 |
| <i>Cobitis lutheri</i>              | -        | NC022717 |
| <i>Cobitis sinensis</i>             | AY526868 | AY526868 |
| <i>Homatula potanini</i>            | NC025321 | NC025321 |
| <i>Homatula variegatus</i>          | NC020095 | NC020095 |
| <i>Jinshaia sinensis</i>            | -        | KJ739867 |
| <i>Koreocobitis naktongensis</i>    | -        | NC015798 |
| <i>Leptobotia taeniops</i>          | -        | KM386686 |
| <i>Micronemacheilus pulcher</i>     | NC031581 | NC031581 |
| <i>Misgurnus nikolskyi</i>          | -        | NC008678 |
| <i>Myxocyprinus asiaticus</i>       | -        | AP006764 |
| <i>Oreonectes jiarongensis</i>      | KU987437 | KU987437 |
| <i>Oreonectes shuilongensis</i>     | -        | KF640641 |
| <i>Parabotia fasciata</i>           | -        | KM393223 |
| <i>Schistura balteata</i>           | AB242172 | AB242172 |
| <i>Schistura jarutanini</i>         | NC031584 | NC031584 |
| <i>Sinogastromyzon sichangensis</i> | KF711948 | KF711948 |

431 *Sinocyclocheilus* (Cyprinidae)

| Species                                 | Mitogenome |
|-----------------------------------------|------------|
| <i>Sinocyclocheilus grahami</i>         | GQ148557   |
| <i>Sinocyclocheilus huizeensis</i>      | MH982229   |
| <i>Sinocyclocheilus tingi</i>           | MG323567   |
| <i>Sinocyclocheilus wumengshanensis</i> | MG021442   |
| <i>Sinocyclocheilus anophthalmus</i>    | KF892542   |
| <i>Sinocyclocheilus angustiporus</i>    | MZ636515   |
| <i>Sinocyclocheilus oxycephalus</i>     | MG686610   |
| <i>Sinocyclocheilus qujingensis</i>     | MH937706   |
| <i>Sinocyclocheilus multipunctatus</i>  | MG026730   |
| <i>Sinocyclocheilus cyphotergous</i>    | MW024377   |
| <i>Sinocyclocheilus punctatus</i>       | MT361976   |
| <i>Sinocyclocheilus hugeibarbus</i>     | MW014319   |
| <i>Sinocyclocheilus lingyunensis</i>    | MW411665   |
| <i>Sinocyclocheilus longibarbus</i>     | MW024371   |
| <i>Sinocyclocheilus yishanensis</i>     | MK387704   |
| <i>Sinocyclocheilus ronganensis</i>     | KX778473   |
| <i>Sinocyclocheilus microphthalmus</i>  | MN145877   |
| <i>Sinocyclocheilus anshuiensis</i>     | KR069120   |
| <i>Sinocyclocheilus bicornutus</i>      | KX528071   |
| <i>Sinocyclocheilus angularis</i>       | MZ636514   |
| <i>Sinocyclocheilus zhenfengensis</i>   | MW014317   |
| <i>Sinocyclocheilus altishoulderus</i>  | FJ984568   |
| <i>Sinocyclocheilus rhinoceros</i>      | KR069119   |
| <i>Sinocyclocheilus furcodorsalis</i>   | GU589570   |
| <i>Sinocyclocheilus jii</i>             | MF100765   |
| <i>Barbus barbus</i>                    | AB238965   |
| <i>Carassius auratus</i>                | AB111951   |
| <i>Cyprinus carpio</i>                  | JN105357   |
| <i>Danio rerio</i>                      | KM244705   |
| <i>Garra orientalis</i>                 | JX290078   |
| <i>Myxocyprinus asiaticus</i>           | AY526869   |
| <i>Neolissochilus hexagonolepis</i>     | KU380329   |
| <i>Onychostoma simum</i>                | KF021233   |
| <i>Puntius ticto</i>                    | AB238969   |
| <i>Schizothorax yunnanensis</i>         | KR780749   |

432

433 *Wardomycopis* (Microascaceae)

| Species                                 | ITS      | LSU      | TEF      | TUB      |
|-----------------------------------------|----------|----------|----------|----------|
| <i>Wardomycopis inopinata</i>           | LN850955 | -        | LN851106 | LN851160 |
| <i>Wardomycopis humicola</i>            | KU314981 | MH870508 | LN851103 | LN851157 |
| <i>Wardomycopis fusca</i>               | MK329142 | MK329047 | MK336077 | MK336148 |
| <i>Wardomycopis dolichi</i>             | MK329139 | MK329044 | MK336074 | -        |
| <i>Wardomycopis longicatenata</i>       | KU746710 | KU746756 | KX855255 | KU746801 |
| <i>Wardomycopis litoralis</i>           | MK312455 | -        | LN851107 | LN851161 |
| <i>Wardomycopis ellipsoconidiophora</i> | MK329140 | MK329045 | MK336075 | MK336146 |
| <i>Microascus brunneosporus</i>         | LM652390 | HG380497 | HG380420 | LM652605 |
| <i>Microascus pseudolongirostris</i>    | -        | -        | KX924147 | -        |
| <i>Scopulariopsis candida</i>           | MN653250 | MH866411 | KX924236 | KX924444 |
| <i>Scopulariopsis brevicaulis</i>       | MT666173 | MK131391 | MT420423 | MT433465 |
| <i>Scopulariopsis asperula</i>          | MH857093 | MH867110 | MG859987 | MG878095 |
| <i>Pseudoscopulariopsis schumacheri</i> | KX923953 | AF400874 | KX924175 | KX924387 |

434 *Microascus* (Microascaceae)

| Species                                                    | ITS       | LSU      | TEF      | TUB      |
|------------------------------------------------------------|-----------|----------|----------|----------|
| <i>Microascus alveolaris</i>                               | LM652380  | HG380482 | HG380405 | LM652596 |
| <i>Microascus brunneosporus</i>                            | LM652390  | HG380497 | HG380420 | LM652605 |
| <i>Microascus campaniformis</i>                            | LM652391  | HG380495 | HG380418 | LM652606 |
| <i>Microascus chartarus</i>                                | LM652393  | HG380463 | HG380386 | LM652607 |
| <i>Microascus cinereus</i>                                 | LM652394  | HG380347 | HG380424 | LM652608 |
| <i>Microascus cirrosus</i>                                 | LM652400  | HG380429 | HG380352 | LM652614 |
| <i>Microascus croci</i>                                    | LM652407  | LM652508 | LM652560 | LM652621 |
| <i>Microascus expansus</i>                                 | LM652409  | HG380491 | HG380414 | LM652623 |
| <i>Microascus hyalinus</i>                                 | LM652418  | LM652513 | LM652564 | LM652631 |
| <i>Microascus intricatus</i>                               | LM652419  | HG380496 | HG380419 | LM652632 |
| <i>Microascus longirostris</i>                             | LM652421  | LM652515 | LM652566 | LM652634 |
| <i>Microascus trigonosporus</i><br>var. <i>macrosporus</i> | LM652423  | LM652517 | LM652568 | LM652636 |
| <i>Microascus murinus</i>                                  | LM652424  | HG380481 | HG380404 | LM652637 |
| <i>Microascus paisii</i>                                   | LM652434  | LM652518 | LM652569 | LM652647 |
| <i>Microascus pyramidus</i>                                | LM652439  | HG380435 | HG380358 | LM652652 |
| <i>Microascus restrictus</i>                               | LM652440  | HG380494 | HG380417 | LM652653 |
| <i>Microascus senegalensis</i>                             | LM652441  | LM652523 | LM652574 | LM652654 |
| <i>Microascus trigonosporus</i>                            | LM652444  | HG380438 | HG380361 | LM652656 |
| <i>Microascus verrucosus</i>                               | LM652446  | HG380493 | HG380416 | LM652658 |
| <i>Microascus collaris</i>                                 | MK329109  | MK329012 | MK336042 | MK336120 |
| <i>Microascus levis</i>                                    | MK329108  | MK329015 | MK336045 | MK336123 |
| <i>Microascus sparsimycelialis</i>                         | MK329111  | MK329016 | MK336046 | MK336124 |
| <i>Microascus superficialis</i>                            | MK329113  | MK329018 | MK336048 | MK336126 |
| <i>Microascus trigonus</i>                                 | MK329117  | MK329022 | MK336052 | MK336130 |
| <i>Microascus globulosus</i>                               | KU746688  | KU746734 | KX855233 | KU746779 |
| <i>Microascus anfractus</i>                                | KU746686  | KU746732 | KX855231 | KU746777 |
| <i>Microascus atrogriseus</i>                              | MG516723  |          | MG516730 | MG516732 |
| <i>Microascus chinensis</i>                                | NR_160574 |          |          |          |
| <i>Microascus cleistocarpus</i>                            | MH866078  | MH877566 | KX924076 | KX924286 |
| <i>Microascus hollandicus</i>                              | KX923869  |          | KX924094 | KX924304 |
| <i>Microascus longicollis</i>                              | KX923874  |          | KX924097 | KX924309 |
| <i>Microascus melanosporus</i>                             | MG516722  |          | MG516728 | MG516738 |
| <i>Microascus micronesiensis</i>                           | KX923906  |          | KX924129 | KX924341 |
| <i>Microascus pseudolongirostris</i>                       |           |          | KX924147 |          |
| <i>Microascus pseudopaisii</i>                             | KX923924  |          | KX924149 | KX924359 |
| <i>Microascus terreus</i>                                  | KX923941  | MH870781 | KX924165 | KX924375 |
| <i>Microascus trautmannii</i>                              | KX923942  |          | KX924166 | KX924376 |
| <i>Scopulariopsis candida</i>                              | MN653250  | MH866411 | KX924236 | KX924444 |
| <i>Scopulariopsis brevicaulis</i>                          | MT666173  | MK131391 | MT420423 | MT433465 |

|                                         |          |          |          |          |
|-----------------------------------------|----------|----------|----------|----------|
| <i>Scopulariopsis asperula</i>          | MH857093 | MH867110 | MG859987 | MG878095 |
| <i>Pseudoscopulariopsis schumacheri</i> | KX923953 | AF400874 | KX924175 | KX924387 |
| <i>Wardomycopsis inopinata</i>          | LN850955 |          | LN851106 | LN851160 |
| <i>Wardomycopsis humicola</i>           | KU314981 | MH870508 | LN851103 | LN851157 |
| <i>Wardomycopsis litoralis</i>          | MK312455 |          | LN851107 | LN851161 |

---



**Gamszarea (Cordycipitaceae)**

| Species                           | ITS      | LSU      | RPB2     | SSU      | TEF      | TUB      |
|-----------------------------------|----------|----------|----------|----------|----------|----------|
| <i>Gamszarea humicola</i>         | MK329092 | MK328997 | MK335979 | MK311230 | MK336027 | -        |
| <i>Gamszarea lunata</i>           | MK329094 | MK328999 | MK335981 | MK311232 | MK336029 | -        |
| <i>Gamszarea microspora</i>       | MK329096 | MK329001 | MK335983 | MK311234 | MK336031 | -        |
| <i>Gamszarea restricta</i>        | LT548279 | -        | -        | -        | LT626943 | LT989952 |
| <i>Gamszarea testudinea</i>       | LT992871 | -        | -        | -        | LT992867 | LT992869 |
| <i>Gamszarea wallacei</i>         | EF641891 | AY184967 | EF469119 | AY184978 | EF469073 | -        |
| <i>Lecanicillium fusisporum</i>   | MW303984 | MH871316 | KR064302 | MK164104 | KM283817 | -        |
| <i>Lecanicillium psalliotae</i>   | MW314051 | MH879607 | MH879626 | MK164121 | MH879678 | MH287134 |
| <i>Simplicillium lamellicola</i>  | MT242290 | MT807907 | DQ522462 | MT807908 | MT826785 | -        |
| <i>Simplicillium lanosoniveum</i> | MT508802 | MT807907 | KY807096 | -        | MT131817 | -        |
| <i>Simplicillium obclavatum</i>   | MT487854 | MH872599 | -        | AF339567 | LC382200 | -        |
| <i>Beauveria bassiana</i>         | MT764765 | MN576824 | MN576938 | -        | -        | MN901081 |
| <i>Beauveria brongniartii</i>     | MT239444 | MN576825 | MN576939 | MG642881 | MN576995 | EU604107 |
| <i>Cordyceps fumosorosea</i>      | MW137998 | MN576817 | MN576931 | MH879638 | MN576987 | -        |
| <i>Cordyceps kyusyuensis</i>      | AY781661 | EF468813 | EF468917 | EF468960 | EF468754 | -        |
| <i>Cordyceps bifusispora</i>      | MG746394 | MH879602 | MF416434 | MH879650 | MH879673 | -        |
| <i>Cordyceps militaris</i>        | MW314048 | -        | MN576932 | -        | MN576988 | -        |

436 *Simplicillium* (Cordycipitaceae)

| Species                             | ITS      | LSU      | RPB2     | SSU      | TEF      |
|-------------------------------------|----------|----------|----------|----------|----------|
| <i>Simplicillium album</i>          | MK329133 | MK329038 | -        | -        | MK336068 |
| <i>Simplicillium aogashimaense</i>  | MT819864 | MT156306 | -        | LC496889 | LC496904 |
| <i>Simplicillium calcicola</i>      | KU746706 | KU746752 | -        | -        | KX855252 |
| <i>Simplicillium cicadellidae</i>   | MN006243 | -        | -        | -        | MN022263 |
| <i>Simplicillium chinense</i>       | KC575116 | KX425621 | -        | KC610806 | -        |
| <i>Simplicillium coffeanum</i>      | MF066034 | MF066032 | -        | -        | -        |
| <i>Simplicillium cylindrosporum</i> | MT320760 | LC496876 | -        | LC496892 | LC496906 |
| <i>Simplicillium filiforme</i>      | MH979338 | MH979399 | -        | -        | -        |
| <i>Simplicillium formicidae</i>     | MN006241 | -        | MN022267 | -        | -        |
| <i>Simplicillium humicola</i>       | MK329136 | MK329041 | -        | -        | MK336071 |
| <i>Simplicillium lamellicola</i>    | MT807906 | MT807907 | LN714708 | MT807908 | MT826785 |
| <i>Simplicillium lanosoniveum</i>   | MT508802 | MT081956 | KY807096 | -        | MT131817 |
| <i>Simplicillium lepidopterorum</i> | MN006246 | -        | -        | -        | MN022265 |
| <i>Simplicillium minatense</i>      | MW166341 | MT156307 | -        | LC496893 | LC496908 |
| <i>Simplicillium obclavatum</i>     | MT102853 | MK788174 | -        | AF339567 | LC382200 |
| <i>Simplicillium subtropicum</i>    | MW260103 | LC496880 | -        | LC496895 | LC496910 |
| <i>Simplicillium sympodiophorum</i> | MH990628 | LC496882 | -        | LC496897 | LC496912 |
| <i>Simplicillium yunnanense</i>     | -        | MN576784 | -        | -        | MN576954 |
| <i>Akanthomyces lecanii</i>         | MW165534 | MT460247 | -        | -        | -        |
| <i>Beauveria bassiana</i>           | MT820333 | MN576824 | MN576938 | -        | -        |
| <i>Beauveria brongniartii</i>       | MH854861 | MN576825 | MN576939 | -        | MN576995 |
| <i>Cordyceps chiangdaoensis</i>     | KT261394 | MF140732 | -        | -        | KT261403 |
| <i>Cordyceps militaris</i>          | MW314048 | MN576818 | MN576932 | -        | MN576988 |

437 *Paracremonium* (Nectriaceae)

| Species                            | ITS      | LSU      | RPB2     | TEF      | TUB      |
|------------------------------------|----------|----------|----------|----------|----------|
| <i>Paracremonium apiculatum</i>    | MK329123 | MK329028 | -        | -        | MK336136 |
| <i>Paracremonium ellipsoideum</i>  | MK329125 | MK329030 | -        | -        | MK336138 |
| <i>Paracremonium variiforme</i>    | KU746691 | KU746737 | KY883246 | -        | KU746783 |
| <i>Paracremonium binnewijzendi</i> | MK828669 | MK828236 | MN194019 | -        | MG254816 |
| <i>Paracremonium moubasheri</i>    | KX384655 | -        | -        | -        | -        |
| <i>Paracremonium inflatum</i>      | km231830 | -        | KM232394 | KM231964 | KM232101 |
| <i>Paracremonium contagium</i>     | KM231830 | -        | KM232396 | KM231966 | KM232103 |
| <i>Paracremonium pembeum</i>       | KP012598 | MT252038 | KT936342 | -        | KU053061 |
| <i>Xenoacremonium falcatus</i>     | MW376895 | -        | -        | KM231967 | -        |
| <i>Xenoacremonium recifei</i>      | MW136145 | MH870491 | KM232397 | KM231968 | KU053053 |

438 **Movie S1. East Asian subtropical zone dynamics.** The estimated location of  
439 subtropical climate in East Asia based on reconstructions of temperature and aridity.

440 **SI References**

- 441 1. W. Testo, M. Sundue, A 4000-species dataset provides new insight into the  
 442 evolution of ferns. *Mol. Phylogenet. Evol.* **105**, 200–211 (2016).
- 443 2. R. E. Morero, R. Deanna, G. E. Barboza, D. S. Barrington, Historical biogeography  
 444 of the fern genus *Polystichum* (Dryopteridaceae) in Austral South America. *Mol.*  
 445 *Phylogenet. Evol.* **137**, 168–189 (2019).
- 446 3. W. Xu, *et al.*, A global plastid phylogeny uncovers extensive cryptic speciation in  
 447 the fern genus *Hymenasplenium* (Aspleniaceae). *Mol. Phylogenet. Evol.* **127**, 203–  
 448 216 (2018).
- 449 4. E. Schuettpelez, K. M. Pryer, Evidence for a Cenozoic radiation of ferns in an  
 450 angiosperm dominated canopy. *Proc. R. Soc. Edinb.* **106**, 11200–11205 (2009).
- 451 5. C. J. Rothfels, *et al.*, The evolutionary history of ferns inferred from 25 low-copy  
 452 nuclear genes. *Am. J. Bot.* **102**, 1089–1107 (2015).
- 453 6. E. M. Friis, *Angiosperms fruits and seeds from the Middle Miocene of Jutland*  
 454 *(Denmark)* (Kommissionær, Munksgaard, 1985).
- 455 7. C. Oh, A. L. Anderberg, J. Schöonenberger, A. A. Anderberg, Comparative seed  
 456 morphology and character evolution in the genus *Lysimachia* (Myrsinaceae) and  
 457 related taxa. *Plant Syst. Evol.* **271**, 177–197 (2008).
- 458 8. H. F. Yan, *et al.*, What explains high plant richness in East Asia? Time and  
 459 diversification in the tribe Lysimachieae (Primulaceae). *New Phytol.* **219**, 436–448  
 460 (2018).
- 461 9. S. Strijk, *et al.*, Timing and tempo of evolutionary diversification in a biodiversity  
 462 hotspot: Primulaceae on Indian Ocean islands. *J. Biogeogr.* **41**, 810–822 (2014).
- 463 10. C. S. P. Foster, S. Y. W. Ho, B. J. Conn, M. J. Henwood, Molecular systematics and  
 464 biogeography of *Logania* R.Br. (Loganiaceae). *Mol. Phylogenet. Evol.* **78**, 324–333  
 465 (2014).
- 466 11. X. Q. Li, *et al.*, Immigration dynamics of tropical and subtropical Southeast Asian  
 467 limestone karst floras. *Proc. R. Soc. B* **289**, 20211308 (2022).
- 468 12. X. Q. Li, *et al.*, *Hemiboea guangdongensis* comb. & stat. nov., a cryptic species  
 469 segregated from *H.subcapitata* (Gesneriaceae) based on morphological and  
 470 molecular data. *Nord. J. Bot.* **37**, 1–12 (2019).
- 471 13. Y. H. Tseng, A. K. Monroe, Y. G. Wei, J. M. Hu, Molecular phylogeny and  
 472 morphology of *Elatostema* s.l. (Urticaceae): Implications for inter and infrageneric  
 473 classifications. *Mole. Phylogenet. Evol.* **132**, 251–264 (2019).
- 474 14. Z. Y. Wu, *et al.*, Testing Darwin’s transoceanic dispersal hypothesis for the inland  
 475 nettle family (Urticaceae). *Ecol. Lett.* **21**, 1515–1529 (2018).
- 476 15. D. C. Thomas, *et al.*, West to east dispersal and subsequent rapid diversification of  
 477 the mega-diverse genus *Begonia* (Begoniaceae) in the Malesian archipelago. *J.*  
 478 *Biogeogr.* **39**, 98–113 (2012).
- 479 16. F. Chung, *et al.*, Phylogenetic analyses of *Begonia* sect. *Coelocentrum* and allied  
 480 limestone species of China shed light on the evolution of Sino-Vietnamese Karst  
 481 flora. *Bot. Stud.* **55**, 1–15 (2014).
- 482 17. L. L. Shao, S. Q. Li, Early Cretaceous greenhouse pumped higher taxa  
 483 diversification in spiders. *Mol. Phylogenet. Evol.* **127**, 146–155 (2018).
- 484 18. P. A. Selden, D. Huang, The oldest haplogyne spider (Araneae: Plectreuridae), from

- 485 the Middle Jurassic of China. *Sci. Nat.* **97**, 449–459 (2010).
- 486 19. J. Wunderlich, R. Milki, Description of the extinct new subfamily Microsegestriinae  
487 (Araneae: Segestriidae) in Cretaceous Lebanese amber. *Beitr. Araneol.* **3b**, 1867–  
488 1873 (2004).
- 489 20. F. Ballarin, S. Q. Li, Diversification in tropics and subtropics following the mid-  
490 Miocene climate change: a case study of the spider genus *Nesticella*. *Glob. Change*  
491 *Biol.* **24**, e577–e591 (2018).
- 492 21. J. Wunderlich, Descriptions of the first fossil spiders (Araneae) of the family  
493 Pimoidae in Baltic amber. *Beitr. Araneol.* **3**, 1279–1297 (2004).
- 494 22. D. Dimitrov, *et al.*, Rounding up the usual suspects: a standard target-gene approach  
495 for resolving the interfamilial phylogenetic relationships of ecribellate orb-weaving  
496 spiders with a new family-rank classification (Araneae, Araneoidea). *Cladistics* **33**,  
497 221–250 (2016).
- 498 23. J. Li, S. Xie, M. Kuang, Geomorphic evolution of the Yangtze Gorges and the time  
499 of their formation. *Geomorphology* **41**, 125–135 (2001).
- 500 24. Y. Otofujii, T. Matsuda, S. Nohda, Opening mode of the Japan Sea inferred from the  
501 paleomagnetism of the Japan arc. *Nature* **317**, 603–604 (1985).
- 502 25. L. Jolivet, K. Tamaki, M. Fournier, Japan Sea, opening history and mechanism: A  
503 synthesis. *J. Geophys. Res.* **99**, 22237–22259 (1994).
- 504 26. L. Garrison, J. Rodriguez, I. Agnarsson, J. A. Coddington, J. E. Bond, Spider  
505 phylogenomics: untangling the spider tree of life. *Peer J* **4**, e1719 (2016).
- 506 27. Z. Zhao, S. Li, Extinction vs. rapid radiation: the juxtaposed evolutionary histories of  
507 coelotine spiders support the Eocene-Oligocene orogenesis of the Tibetan Plateau.  
508 *Syst. Biol.* **66**, 988–1006 (2017).
- 509 28. W. Xu, *et al.*, Herpetological phylogeographic analyses support a Miocene focal  
510 point of Himalayan uplift and biological diversification. *Natl. Sci. Rev.* **8**, nwa263  
511 (2020).
- 512 29. P. Yu, L. Zhou, W. T. Yang, L. Miao, Z. Li, X. Zhang, Y. Wang, J. F. Gui,  
513 Comparative mitogenome analyses uncover mitogenome features and phylogenetic  
514 implications of the subfamily Cobitinae. *BMC Genomics* **22**, 50 (2021).
- 515 30. W. T. Chen, J. P. Yang, Y. F. Li, X. H. Li, Exploring taxonomic diversity and  
516 biogeography of the family Nemacheilinae (Cypriniformes). *Ecol. Evol.* **9**, 10343–  
517 10353 (2019).
- 518 31. H. M. Wen, *et al.*, Molecular phylogeny and historical biogeography of the cave fish  
519 genus *Sinocyclocheilus* (Cypriniformes: Cyprinidae) in southwest China. *Integr.*  
520 *Zool.* **17**, 311–325 (2022).
- 521 32. Z. F. Zhang, P. Zhao, L. Cai, Origin of Cave Fungi. *Front. Microbiol.* **9**, 1407 (2018).
- 522 33. J. Pu, *et al.*, Factors controlling the growth rate, carbon and oxygen isotope variation  
523 in modern calcite precipitation in a subtropical cave, southwest China. *J. Asian*  
524 *Earth Sci.* **119**, 167–178 (2016).
- 525 34. T. Y. Li, C. X. Huang, L. J. Tian, M. B. Suarez, Y. L. Gao, Variation of  $\delta^{13}\text{C}$  in  
526 plant-soil-cave systems in karst regions with different degrees of rocky  
527 desertification in southwest China and implications for paleoenvironment  
528 reconstruction. *J. Cave Karst Stud.* **80**, 212–228 (2018).
- 529 35. X. Guo, X. Gong, D. Yuan, G. Jiang, C. Chen, Response of drip water temperature  
530 to climate variability: a case study in Xiaoyan Cave, southwest China. *Hydrol. Sci. J.*

- 531 **64**, 873–884 (2019).
- 532 36. Y. Yang, T. Xu, X. Zhang, L. Ma, X. Jiang, Typhoon rainfall impact on drip water  
533  $\delta^{18}\text{O}$  in Xianyun Cave, southeast China. *Hydrol. Process.* **35**, e14062 (2021).
- 534 37. H. Zhou, *et al.*, Characteristics and petroleum geological implication of paleo-cave  
535 fillings in Longwangmiao Formation of Lower Cambrian in central Sichuan Basin,  
536 China. *J. Chengdu Univ. Technol. (Sci. Technol. Ed.)* **43**, 188–198 (2016).
- 537 38. J. R. Liu, Preliminary discussion on the development of karst caves in Guilin and  
538 redefinition of their forming time. *Guangxi Geol.* **1**, 67–80 (1995).
- 539 39. C. M. Chen, Karst cave development and mineral deposit features. *Geotecton. et*  
540 *Metallog.* **2**, 183–190 (1994).
- 541 40. M. L. Zhang, *et al.*, Characteristics of deposits and the depositional environment in the  
542 Shuijinggong cave in Bama, Guangxi. *Acta. Geol. Sin.* **32**, 345–357 (2013).
- 543 41. J. B. Yu, X. Y. Wang, Z. H. Wang, Geomorphic characteristics and paleogeographic  
544 environment of caves in Lunan, Yunnan. *Sci. Bull.* **11**, 686–689 (1984).
- 545 42. L. B. Zhang, *et al.*, “Dryopteridaceae” in *Flora of China*, Z. Y. Wu, P. H. Raven, D.  
546 Y. Hong, Eds. (Science Press & Missouri Botanical Garden Press, Beijing & St.  
547 Louis, 1998), pp. 541–724.
- 548 43. K. L. Gibbons, M. J. Henwood, B. J. Conn, Phylogenetic relationships in Loganiaceae  
549 (Loganiaceae) inferred from nuclear ribosomal and chloroplast DNA sequence data.  
550 *Aust. Syst. Bot.* **25**, 331–340 (2012).
- 551 44. M. Z. Xu, L. H. Yang, H. H. Kong, F. Wen, M. Kang, Congruent spatial patterns of  
552 species richness and phylogenetic diversity in karst flora: Case study of *Primulina*  
553 (Gesneriaceae). *J. Syst. Evol.* **59**, 251–261 (2020).
- 554 45. B. Zhang, *et al.*, *Petrocodon tongziensis* (Gesneriaceae), a new species from  
555 limestone areas in Guizhou, China based on morphological and molecular evidence.  
556 *Nord. J. Bot.* **37**, e01774 (2019).
- 557 46. Z. J. Qiu, J. Zhang, X. R. Baskaran, J. Hu, Z. Y. Liu, *Petrocosmea nanchuanensis*  
558 (Gesneriaceae), a new species from Chongqing, China. *PhytoKeys* **157**, 137–144  
559 (2020).
- 560 47. A. Weber, Y. G. Wei, S. Sontag, M. Möller, Inclusion of *Metabriggsia* into  
561 *Hemiboea* (Gesneriaceae). *Phytotaxa* **23**, 37–48 (2011).
- 562 48. D. X. Nong, *et al.*, *Lysionotus fengshanensis* Yan Liu & D. X. Nong sp. nov.  
563 (Gesneriaceae) from Guangxi, China. *Nord. J. Bot.* **28**, 720–722 (2010).
- 564 49. W. B. Xu, *et al.*, Three new species of *Paraboea* (Gesneriaceae) from limestone  
565 karsts of China based on morphological and molecular evidence. *Bot. Stud.* **58**, 56  
566 (2017).
- 567 50. W. Moonlight, *et al.*, Dividing and conquering the fastest-growing genus: Towards a  
568 natural sectional classification of the mega-diverse genus *Begonia* (Begoniaceae).  
569 *Taxon* **67**, 267–323 (2018).
- 570 51. H. F. Zhao, S. Li, A. Zhang, Taxonomic revision of Telemidae (Arachnida, Araneae)  
571 from East and Southeast Asia. *ZooKeys* **933**, 15–93 (2020).
- 572 52. B. Li, Z. Zhao, C. Zhang, S. Q. Li, *Troglocoelotes* gen. n., a new genus of  
573 Coelotinae spiders (Araneae, Agelenidae) from caves in South China. *Zootaxa* **4554**,  
574 219–238 (2019).
- 575 53. X. Zhang, Z. Zhe, G. Zheng, S. Li, A further study of the spider genus *Notiocoelotes*  
576 (Araneae, Agelenidae) from Hainan island, China. *Zookeys* **601**, 75–87 (2016).

- 577 54. P. Uetz, P. Freed, J. Hošek, The Reptile Database. (2021). [http://www.reptile-](http://www.reptile-database.org)  
578 database.org (accessed May 2021).
- 579 55. B. Zhang, Y. Li, K. Hu, P. Li, D. Yang, A new species of *Odorrana* (Anura, Ranidae)  
580 from Hunan Province, China. *Zookeys* **1024**, 91–115 (2021).
- 581 56. H. F. Yang, Z. M. Chen, W. X. Li, A new blind subterranean species of the genus  
582 *Bibarba* from Yunnan, China. *J. Jishou Univ.* **41**, 67–72 (2020).
- 583 57. X. Liu, H. Q. Deng, Z. J. Liu, J. Zhou, Reassignment of '*Triplophysa*' *jiarongensis*  
584 (Cypriniformes: Nemacheilidae) to *Oreonectes* Günther, 1868. *Zootaxa* **4565**, 3–6  
585 (2019).
- 586 58. H. H. Wu, *et al.*, Molecular phylogeny and biogeography of *Triplophysa* stone  
587 loaches in the Central Chinese Mountains. *Biol. J. Linnean Soc.* **130**, 563–577  
588 (2020).
- 589 59. Z. F. Zhang, *et al.*, Culturable mycobiota from karst caves in China II, with  
590 descriptions of 33 new species. *Fungal Divers.* **106**, 1–108 (2020).
- 591 60. H. He, L. B. Zhang, *Polystichum cavernicola*, sp. nov. (sect. *Haplopolystichum*,  
592 Dryopteridaceae) from a karst cave in Guizhou, China and its phylogenetic affinities.  
593 *Bot. Stud.* **52**, 121–127 (2011).
- 594 61. L. B. Zhang, H. He, *Polystichum fengshanense*, sp. nov. (sect. *Haplopolystichum*,  
595 Dryopteridaceae) from karst caves in Guangxi, China based on morphological,  
596 palynological, and molecular evidence. *Sys. Bot.* **36**, 854–861 (2011).
- 597 62. A. K. Monro, N. Bystriakova, L. F. Fu, F. Wen, Y. G. Wei, Discovery of a diverse  
598 cave flora in China. *PLoS ONE* **13**, e0190801 (2018).
- 599 63. H. He, L. B. Zhang, *Polystichum kungianum*, sp. nov. (sect. *Mastigopteris*,  
600 Dryopteridaceae) from Chongqing, China. *Bot. Stud.* **51**, 395–401 (2010).
- 601 64. L. B. Zhang, H. He, *Polystichum minutissimum* sp. Nov. (sect. *Haplopolystichum*,  
602 Dryopteridaceae): The smallest *Polystichum* found in a karst cave in China. *Bot.*  
603 *Stud.* **50**, 353–358 (2009).
- 604 65. L. B. Zhang, H. He, *Polystichum speluncicola* sp. nov. (sect. *Haplopolystichum*,  
605 Dryopteridaceae) based on morphological, palynological, and molecular evidence  
606 with reference to the non-monophyly of *Cyrtogonellum*. *Syst. Bot.* **35**, 13–19 (2010).
- 607 66. K. W. Xu, X. M. Zhou, L. B. Zhang, W. B. Liao, *Hymenasplenium hastifolium* sp  
608 nov (Aspleniaceae) from a karst cave in western Guangxi, China. *Phytotaxa* **333**,  
609 281 (2018).
- 610 67. K. W. Xu, *et al.*, Nine new species of *Hymenasplenium* (Aspleniaceae) from Asia.  
611 *Phytotaxa* **358**, 1–25 (2018).
- 612 68. Y. F. Huang, L. N. Dong, W. B. Xu, *Lysimachia fanii*, a new species of Primulaceae  
613 from limestone area of Guangxi, China. *Phytokeys* **130**, 75–84 (2019).
- 614 69. D. Fang, D. H. Qin, Four new species of *Mitreola* Linn. (Loganiaceae) from  
615 Guangxi. *J. Trop. Subtrop. Bot.* **3**, 30–35 (1995).
- 616 70. Y. Z. Ge, F. Wen, B. Pan, *Primulina linglingensis* var. *fragrans*, a new variety  
617 (Gesneriaceae) from Guangxi, China. *Telopea* **18**, 221–226 (2015).
- 618 71. X. Hong, S. B. Zhou, F. Wen, *Primulina chizhouensis* sp. nov. (Gesneriaceae), a  
619 new species from a limestone cave in Anhui, China. *Phytotaxa* **50**, 13–18 (2012).
- 620 72. J. Li, X. Hong, F. Wen, L. J. Yan, *Primulina pseudorosealba* (Gesneriaceae), a new  
621 species from a karst cave in Guangxi, China. *Ann. Bot. Fenn.* **51**, 86–89 (2014).
- 622 73. W. T. Wang, Tres specles novaw Hciritae (Gesneriaceae) e Hunan. *Bull. Bot. Res.* **9**,



- 623 21–28 (1989).
- 624 74. X. Hong, O. W. Wang, S. B. Zhou, F. Wen, *Primulina argentea* (Gesneriaceae), a  
625 new species endemic to a karst cave in N Guangdong, S China. *Willdenowia* **44**,  
626 377–383 (2014).
- 627 75. K. F. Chung, H. Y. Huang, C. I. Peng, W. B. Xu, *Primulina mabaensis*  
628 (Gesneriaceae), a new species from a limestone cave of northern Guangdong, China.  
629 *Phytotaxa* **92**, 40–48 (2013).
- 630 76. F. Wen, S. L. Xi, Y. Wang, M. S. Xiang, L. F. Fu, *Primulina fengshanensis*  
631 (Gesneriaceae), a New Species from Guangxi, China. *Ann. Bot. Fenn.* **49**, 103–106  
632 (2012).
- 633 77. C. Feng, *et al.*, The genome of a cave plant, *Primulina huaijiensis*, provides insights  
634 into adaptation to limestone karst habitats. *New Phytol.* **227**, 1249–1263 (2020).
- 635 78. D. Fang, D. H. Qin, *Wentsaiboaea* D. Fang & D. H. Qin, a new genus of the  
636 Gesneriaceae from Guangxi, China. *Acta Phytotax. Sin.* **42**, 533–536 (2004).
- 637 79. W. H. Wu, W. B. Xu, D. X. Nong, Y. Liu, *Chirita ningmingensis* (Gesneriaceae), a  
638 new species from Guangxi, China. *Ann. Bot. Fenn.* **48**, 422–424 (2011).
- 639 80. W. B. Xu, Y. Liu, H. S. Gao, *Chiritopsis jingxiensis*, a new species of Gesneriaceae  
640 from a karst cave in Guangxi, China. *Novon* **19**, 559–561 (2009).
- 641 81. Y. G. Wei, Gesneriaceae of South China (Guangxi Science and Technology  
642 Publishing House, Nan'ning, 2011).
- 643 82. Y. S. Huang, W. B. Xu, Y. Liu, *Chirita rongshuiensis*, a new species of  
644 Gesneriaceae from northern Guangxi, China. *Taiwania* **56**, 54–57 (2011).
- 645 83. N. Jiang, H. Li, *Primulina debaoensis* sp. nov. (Gesneriaceae) from a limestone cave  
646 in Guangxi, China. *Nord. J. Bot.* **31**, 631–634 (2013).
- 647 84. W. B. Xu, B. Pan, Y. Liu, C. I. Peng, K. F. Chung, Two new species, *Primulina*  
648 *multifida* and *P. pseudomollifolia* (Gesneriaceae), from karst caves in Guangxi,  
649 China. *Bot. Stud.* **53**, 165–175 (2012).
- 650 85. W. B. Xu, B. Pan, Y. S. Huang, Y. Liu, *Chirita leprosa* sp. nov. (Gesneriaceae) from  
651 limestone areas in Guangxi, China. *Nord. J. Bot.* **28**, 705–708 (2010).
- 652 86. Z. L. Ning, J. Wang, J. F. Smith, M. Kang, *Primulina qingyuanensis* (Gesneriaceae),  
653 a new species from limestone areas in Guangdong, China. *Phytotaxa* **137**, 48–52  
654 (2013).
- 655 87. W. H. Wu, W. B. Xu, L. Wu, *Chiritopsis hezhouensis* (Gesneriaceae) from Karst  
656 Caves in Guangxi, China. *Taiwania* **56**, 132–137 (2011).
- 657 88. J. M. Li, Y. Z. Wang, *Chirita longicalyx* (Gesneriaceae), a new species from  
658 Guangxi, China. *Ann. Bot. Fenn.* **45**, 212–214 (2008).
- 659 89. Y. S. Huang, W. B. Xu, X. X. Ye, Y. Liu, *Chirita luzhaiensis*, a new species of  
660 Gesneriaceae from limestone areas in Guangxi, China. *J. Trop. Subtrop. Bot.* **18**,  
661 137–139 (2010).
- 662 90. F. Wen, Y. Wang, W. F. Fan, L. F. Guo, Q. X. Zhang, *Chirita leei* (Gesneriaceae), a  
663 new species from Guangxi, China. *Guihaia* **6**, 719–723 (2009).
- 664 91. Z. L. Ning, B. Pan, F. Wen, *Primulina yingdeensis*, a new species from Guangdong,  
665 China, and *P. rosulata*, a new combination (Gesneriaceae), based on morphological  
666 and molecular evidence. *Willdenowia* **46**, 399–409 (2016).
- 667 92. W. T. Wang, Notulae de Gesneriaceis Sinensibus (VII). *Guihaia* **6**, 1–15 (1986).
- 668 93. W. T. Wang, Notulae de Gesneriaceis Sinensibus (X). *Guihaia* **12**, 289–300 (1992).

- 669 94. Z. B. Xin, et al. *Primulina zhoui* and *P. huangii* (Gesneriaceae), two new species  
670 from limestone areas in Guangxi, China. *Taiwania* **63**, 54–60 (2018).
- 671 95. Y. Liu, W. B. Xu, B. Pan, *Wentsaiboea tiandengensis* sp. nov. and *W. luochengensis*  
672 sp. nov. (Gesneriaceae) from karst caves in Guangxi, southern China. *Nord. J. Bot.*  
673 **28**, 739–745 (2010).
- 674 96. J. Guo, T. Meng, H. B. Pang, Q. Zhang, *Petrocodon retroflexus* sp. nov.  
675 (Gesneriaceae) from a karst cave in Guizhou, China. *Nord. J. Bot.* **34**, 159–164  
676 (2016).
- 677 97. G. Q. Gou, X. Y. Wang, Y. X. Xiong, *Petrocosmea xanthomaculata* G. Q. Gou et X.  
678 Y. Wang, a new species of the genus *Petrocosmea*. *Oliv. Bull. Bot. Res.* **30**, 394–396  
679 (2010).
- 680 98. S. W. Li, M. Q. Han, X. J. Li, Z. Y. Li, X. G. Xiang, *Hemiboea suiyangensis*  
681 (Gesneriaceae): a new species from Guizhou, China. *PhytoKeys* **99**, 99–106 (2018).
- 682 99. D. X. Nong, W. B. Xu, W. H. Wu, Y. Liu, *Lysionotus fengshanensis* Yan Liu & D.  
683 X. Nong sp. nov. (Gesneriaceae) from Guangxi, China. *Nord. J. Bot.* **28**, 720–722  
684 (2010).
- 685 100. W. T. Wang, A revision of the genus *Chirita* (Gesneriaceae) in China. *Bull. Bot. Res.*  
686 **5**, 37–86 (1985).
- 687 101. W. T. Wang, Y. G. Wei, Five new species of *Elatostema* J. R. et G. Forst.  
688 (Urticaceae) from Guangxi, China. *Guihaia* **6**, 811–817 (2007).
- 689 102. Y. G. Wei, W. T. Wang, A New Species of *Elatostema* (Urticaceae) from Guangxi  
690 Province, China. *Harv. Pap. Bot.* **14**, 183–185 (2009).
- 691 103. Q. Lin, L. D. Duan, Two new species and a new series of *Elatostema* (Urticaceae)  
692 from China. *Bot. J. Linn. Soc.* **158**, 674–680 (2008).
- 693 104. Z. Y. Wu, W. T. Wang, H. Wang, D. Z. Li, *Elatostema densistriolatum* sp. nov., *E.*  
694 *latistipulum* sp. nov. and *E. cyrtandrifolium* var. *hirsutum* var. nov. (Urticaceae) from  
695 southwest China. *Nord. J. Bot.* **29**, 227–232 (2011).
- 696 105. Y. Liu, X. M. Gu, J. Y. Peng, *Begonia bamaensis* (sect. *Coelocentrum*, Begoniaceae),  
697 a new species from limestone areas in Guangxi, China. *Bot. Stud.* **48**, 465–473  
698 (2007).
- 699 106. Y. M. Shui, W. H. Chen, New Data of Sect *Coelocentrum* (Begonia) in Begoniaceae.  
700 *Acta Bot. Yunnan.* **27**, 20 (2005).
- 701 107. Y. Lin, S. Li, Long-legged cave spiders (Araneae, Telemidae) from Yunnan-  
702 Guizhou Plateau, southwestern China. *Zootaxa* **2445**, 1–34 (2010).
- 703 108. H. F. Zhao, Z. Y. Yao, Y. Song, S. Q. Li, Taxonomic study of the *Pinelema*  
704 *bailongensis* species group with descriptions of six new species from China  
705 (Araneae, Telemidae). *ZooKeys* **784**, 7–57 (2018).
- 706 109. C. Wang, S. Li, New species of the spider genus *Telema* (Araneae, Telemidae) from  
707 caves in Guangxi, China. *Zootaxa* **2632**, 1–45 (2010).
- 708 110. H. Chen, M. Zhu, Two new troglobitic species of the genus *Telema* (Araneae,  
709 Telemidae) from Guizhou, southwestern China. *J. Nat. Hist.* **43**, 1705–1713 (2009).
- 710 111. Y. Song, H. Zhao, Y. Luo, S. Li, Three new species of *Pinelema* from caves in  
711 Guangxi, China (Araneae, Telemidae). *ZooKeys* **692**, 83–101 (2017).
- 712 112. Y. Tong, S. Li, The spiders of the genus *Telema* (Araneae: Telemidae) from Hainan  
713 Island, China. *Raffles Bull. Zool.* **56**, 59–66 (2008).
- 714 113. X. P. Wang, X. Xu, S. Q. Li, *Notiocoelotes*, a new genus of the spider subfamily

- 715 Coelotinae from Southeast Asia (Araneae, Amaurobiidae). *Zootaxa* **1853**, 1–17  
716 (2008).
- 717 114. J. H. Yang, N. L. Orlov, Y. Y. Wang, A new species of pitviper of the genus  
718 *Protobothrops* (Squamata: Viperidae) from China. *Zootaxa* **2936**, 59–68 (2011).
- 719 115. E. M. Zhao, M. H. Huang, Y. Zong, Fauna Sinica (Reptilia 3): Squamata (Serpentes)  
720 (Science Press, Beijing, 1998).
- 721 116. Y. M. Mo, W. C. Chen, H. Y. Wu, W. Zhang, S. C. Zhou, A New Species of  
722 *Odorrana* inhabiting complete darkness in a karst cave in Guangxi, China. *Asian*  
723 *Herpetol.* **6**, 11–17 (2015).
- 724 117. T. J. Wu, J. Yang, L. H. Xiu, A new species of *Bibarba* (Teleostei: Cypriniformes:  
725 Cobitidae) from Guangxi, China. *Zootaxa* **3905**, 138–144 (2015).
- 726 118. X. Liu, H. Q. Deng, Z. J. Liu, J. Zhou, Reassignment of '*Triplophysa*' *jiarongensis*  
727 (Cypriniformes: Nemacheilidae) to *Oreonectes* Günther, 1868. *Zootaxa* **4565**, 3–6  
728 (2019).
- 729 119. H. Q. Deng, H. M. Wen, N. Xiao, J. Zhou, A new blind species of the cave genus  
730 *Oreonectes* from Guizhou, China (Nemacheilinae). *ZooKeys* **637**, 47–59 (2016).
- 731 120. A. Romero, Y. H. Zhao, X. Y. Chen, The Hypogean fishes of China. *Environ. Biol.*  
732 *Fish* **86**, 211–278 (2009).
- 733 121. H. Q. Deng, N. Xiao, X. F. Hou, J. Zhou, A new species of the genus *Oreonectes*  
734 (Cypriniformes: Nemacheilidae) from Guizhou, China. *Zootaxa* **4132**, 143–150  
735 (2016).
- 736 122. J. Lan, X. Gan, T. Wu, J. Yang, *Cave Fishes of Guangxi, China* (Science Press,  
737 Beijing, 2013).
- 738 123. F. G. Luo, J. Huang, X. Liu, T. Luo, Y. H. Wen, *Sinocyclocheilus ronganensis* Luo,  
739 Huang et Wen sp. nov., a new species belonging to *Sinocyclocheilus* Fang from  
740 Guangxi (Cypriniformes: Cyprinidae). *J. South. Agric.* **47**, 650–655 (2016).
- 741 124. X. Gan, T. J. Wu, M. L. Wei, J. Yang, A new blind barbine species, *Sinocyclocheilus*  
742 *anshuiensis* sp. nov. (Cypriniformes: Cyprinidae) from Guangxi, China. *Zool. Res.*  
743 **34**, 459–463 (2013).
- 744 125. Z. F. Zhang, *et al.*, Culturable mycobiota from karst caves in China, with  
745 descriptions of 20 new species. *Persoonia* **39**, 1–31 (2017).
- 746 126. P. G. DeCelles, *et al.*, Oligocene-Miocene great lakes in the India-Asia collision  
747 zone. *Basin Res.* **30**, 228–247 (2018).
- 748 127. A. Gébelin, *et al.*, The Miocene elevation of Mount Everest. *Geology* **41**, 799–802  
749 (2013).
- 750 128. Q. Xu, *et al.*, Paleogene high elevations in the Qiangtang Terrane, central Tibetan  
751 Plateau. *Earth Planet. Sci. Lett.* **362**, 31–42 (2013).
- 752 129. F. Wu, D. Miao, M. M. Chang, G. Shi, N. Wang, Fossil climbing perch and  
753 associated plant megafossils indicate a warm and wet central Tibet during the late  
754 Oligocene. *Sci. Rep.* **7**, 878 (2017).
- 755 130. L. Ding, *et al.*, Quantifying the rise of the Himalaya orogen and implications for the  
756 South Asian monsoon. *Geology* **45**, 215–218 (2017).
- 757 131. T. Su, *et al.*, No high Tibetan Plateau until the Neogene. *Sci. Adv.* **5**, eaav2189  
758 (2019).
- 759 132. T. Su, *et al.*, Uplift, climate and biotic changes at the Eocene-Oligocene transition in  
760 South-Eastern Tibet. *Natl. Sci. Rev.* **6**, 495–504 (2018).

- 761 133. G. D. Hoke, J. Liu-Zeng, M. T. Hren, G. K. Wissink, C. N. Garziona, Stable isotopes  
762 reveal high southeast Tibetan Plateau margin since the Paleogene. *Earth Planet. Sci.*  
763 *Lett.* **394**, 270–278 (2014).
- 764 134. G. Z. Wang, F. Y. Chu, C. S. Wang, Paleoelevation reconstruction of Red River  
765 drainage areas in Western Yunnan Plateau since Miocene. *J. Chengdu Univer. Tech.*  
766 **31**, 118–124 (2004).
- 767 135. J. Huang, *et al.*, Pliocene flora and paleoenvironment of Zanda Basin, Tibet, China.  
768 *Sci. China Earth Sci.* **63**, 212–223 (2020).
- 769 136. M. A. Khan, *et al.*, Miocene to Pleistocene floras and climate of the Eastern  
770 Himalayan Siwaliks, and new paleoelevation estimates for the Namling-Oiyug Basin,  
771 Tibet. *Global Planet. Change* **113**, 1–10 (2014).
- 772 137. C. N. Garziona, *et al.*, Predicting paleoelevation of Tibet and the Himalaya from  $\delta$   
773  $^{18}\text{O}$  vs. altitude gradients in meteoric water across the Nepal Himalaya. *Earth*  
774 *Planet. Sci. Lett.* **183**, 215–229 (2000).
- 775 138. T. Deng, L. Ding, Paleoaltimetry reconstructions of the Tibetan Plateau: Progress  
776 and contradictions. *Natl. Sci. Rev.* **2**, 417–437 (2015).
- 777 139. F. M. B. Jacques, *et al.*, Late Miocene southwestern Chinese floristic diversity  
778 shaped by the southeastern uplift of the Tibetan Plateau, *Palaeogeogr.*  
779 *Palaeoclimatol. Palaeoecol.* **411**, 208–215 (2014).
- 780 140. K. Wang, *et al.*, *Cretaceous-Tertiary palynological assemblages from Anhui*  
781 (Petroleum Industry Press, Beijing, 1987).
- 782 141. Q. Wang, Y. Li, D. K. Ferguson, W. B. Mo, N. Yang, An equable subtropical  
783 climate throughout China in the Miocene based on palaeofloral evidence. *Earth Sci.*  
784 *Rev.* **218**, 103649 (2021).
- 785 142. Y. Zheng, S. Zhang, An Early Miocene Palynological Assemblage from Drill Hole  
786 T103 in Tianchang, Anhui Province. *Acta Micropalaeontologica Sin.* **3**, 151–160  
787 (1986).
- 788 143. S. Zhang, H. Shen, X. Qu, Q. Gao, *Tertiary in Petroliferous Region of China, V. The*  
789 *Hubei-Henan-Anhui Region* (Petroleum Industry Press, Beijing, 1993).
- 790 144. Y. Zheng, W. Wang, Sequence of Miocene Fotan Group in SE Fujian and its Palyno-  
791 Assemblages. *Acta Palaeontologica Sin.* **33**, 200–216 (1994).
- 792 145. W. Wang, Spore and Pollen Grains from Miocene Lignite Deposit of Yalong Viliage,  
793 Yao Autonomous County, Guangxi, China. *Acta Palaeontol. Sin.* **28**, 786–802  
794 (1989).
- 795 146. W. Li, Y. Liang, The Pliocene spore-pollen assemblages of Huang Hua in Hebei  
796 Plain and its significance in palaeobotany and palaeogeography. *Acta Bot. Sin.* **23**,  
797 81–109 (1981).
- 798 147. Y. Zhang, K. Wang, H. Jiang, Sporopollen assemblages from Fengshan Formation  
799 of Sihong, Jiangsu and its ages. *J. Stratigr.* **6**, 107–111 (1982).
- 800 148. Z. C. Song, *et al.*, *Cretaceous-Tertiary Palynological Assemblages from Jiangsu*  
801 (Geological Publishing House, Beijing, 1981).
- 802 149. X. Sun, Y. He, Neogene spore-pollen assemblages from Jiangxi Province, China.  
803 *Bot. Res.* **3**, 83–108 (1987).
- 804 150. X. Zhao, X. Zhang, M. Wang, A Study on Miocene Biostratigraphy in Liaocheng,  
805 NW Shandong. *Acta Geogr. Sin.* **78**, 296–301 (2004).
- 806 151. G. A. Liu, Late Tertiary palynological assemblage from the Yaoshan Formation of

- 807 Shanwang, Linju County. Shandong. *Acta palaeobotanica et palynologica Sinica* **1**,  
808 65–84 (1986).
- 809 152. Y. M. Yao, H. D. Liang, Z. G. Cai, *The Bohai Gulf Basin. Tertiary in Petroliferous*  
810 *Regions of China, IV*, (Petroleum Industry Press, Beijing, 1994).
- 811 153. X. Sun, Y. Fan, C. Deng, Z. Yu, Cenozoic Sporo-Pollen assemblages of the Weihe  
812 Basin, Shaanxi. *Bull. Inst. Geol.* **1**, 81–109 (1980).
- 813 154. G. Liu, W. Li, Upper Cretaceous-Tertiary of western Sichuan Plateau. *J. Stratigr.* **26**,  
814 161–169 (2002).
- 815 155. Q. Q. Zhang, D. K. Ferguson, V. Mosbrugger, Y. F. Wang, C. S. Li, Vegetation and  
816 climatic changes of SW China in response to the uplift of Tibetan Plateau.  
817 *Palaeogeogr. Palaeoclimatol. Palaeoecol.* **363**, 23–36 (2012).
- 818 156. Y. W. Xing, *et al.*, Paleoclimatic estimation reveals a weak winter monsoon in  
819 southwestern China during the late Miocene: Evidence from plant macrofossils.  
820 *Palaeogeogr. Palaeoclimatol. Palaeoecol.* **358**, 19–26 (2012).
- 821 157. K. Xia, *et al.*, Quantitative climate reconstructions of the late Miocene Xiaolongtan  
822 megaf flora from Yunnan, southwest China. *Palaeogeogr. Palaeoclimatol. Palaeoecol.*  
823 **276**, 80–86 (2009).
- 824 158. Y. Zheng, “Miocene pollen and spores from Xianju-Ninghai, Zhejiang” in *Selected*  
825 *papers of the 1st scientific conference of the Palynological Society of China*, The  
826 Palynological Society of China Eds. (Science Press, Beijing, 1982), pp. 71–74.
- 827 159. K. Wang, H. Jiang, Z. Zheng, Y. Zhang, W. Wang, Sporo-pollen and siliceous algae  
828 assemblages from the intercalated bed of basaltic sediments in Tiantai, Xinchang,  
829 Shengxian of Zhejiang. *J. Stratigr.* **9**, 28–36 (1985).
- 830 160. S. E. Fick, R. J. Hijmans, WorldClim 2: New 1-km spatial resolution climate  
831 surfaces for global land areas. *Int. J. Climatol.* **37**, 4302–4315 (2017).
